# Supplementary material for: From GWAS to Translational Insights: Comprehensive Genetic Analysis of Nephrotic Syndrome from Multiple Populations
Source: Research Square preprint supplement (doi:10.21203/rs.3.rs-7482306/v1), 2025-10-08
Supplement: Supplementary file 1 [file 7549de184a697c14807bf54e.xlsx]

## Sheet: Table S1a
Supplementary Table 1a. Significant (P<5e-8) GWAS results from multi-ancestry meta-analysis (GRCh38).
rsID	CHR	BP	Mapped Gene	Effect Allele	Other Allele	EAF	Beta	SE	P
rs144067518	1	167793654	MPZL1	A	G	0.0277	1.7841	0.3177	1.965e-08
rs191872995	1	185737251	HMCN1	C	G	0.9887	-4.2476	0.7408	9.823e-09
rs148739162	2	3331215	EIPR1	T	C	0.9857	-4.1466	0.7471	2.854e-08
rs116501595	2	159990831	PLA2R1	T	C	0.0137	0.8102	0.1437	1.714e-08
rs76733679	2	173306142	MAP3K20	T	G	0.0302	3.4199	0.6	1.2e-08
-	2	232851424	GIGYF2	T	C	0.0529	0.8444	0.1522	2.89e-08
-	4	142870085	USP38	A	C	0.9825	-0.9291	0.1561	2.641e-09
-	4	142882944	USP38	A	G	0.9875	-0.9851	0.1761	2.218e-08
-	4	142907271	USP38	T	G	0.0172	0.9291	0.1565	2.875e-09
-	4	142969266	USP38	A	G	0.9815	-0.9312	0.1615	8.125e-09
-	4	142990460	USP38	C	G	0.9873	-0.9576	0.1756	4.94e-08
-	4	142991252	USP38	A	T	0.0127	0.9576	0.1756	4.94e-08
rs559177455	4	143042910	USP38	A	C	0.0156	1.0021	0.1653	1.349e-09
-	4	143050488	USP38	T	C	0.9892	-1.049	0.19	3.347e-08
-	4	143090149	USP38	T	C	0.014	0.976	0.1723	1.479e-08
-	4	143093876	USP38	T	C	0.0112	1.0161	0.1852	4.129e-08
-	4	143103186	USP38	A	C	0.011	1.02	0.1851	3.564e-08
-	4	143106320	USP38	T	C	0.989	-1.02	0.1851	3.564e-08
rs200195313	6	17006793	STMND1	CAG	C	0.955	-2.2012	0.3939	2.293e-08
rs141748163	6	30386639		T	TA	0.8824	-0.3101	0.0553	1.988e-08
rs3131781	6	30969955		A	G	0.8831	-0.3213	0.0534	1.815e-09
rs3132579	6	30973212		T	C	0.8443	-0.2493	0.0451	3.319e-08
rs3094084	6	30979732		A	T	0.8457	-0.2601	0.0453	9.7e-09
rs1634714	6	30983784		T	C	0.8443	-0.247	0.0451	4.356e-08
rs1632863	6	31000992		C	G	0.8813	-0.308	0.0557	3.288e-08
rs1634716	6	31001977		A	G	0.1171	0.314	0.0534	4.041e-09
rs1634721	6	31009903		A	G	0.1172	0.3146	0.0533	3.643e-09
rs1634726	6	31018051		A	G	0.1191	0.3218	0.054	2.454e-09
rs1628680	6	31021048		A	G	0.1543	0.2533	0.0453	2.335e-08
rs2517546	6	31041278		T	C	0.1352	0.2866	0.0493	6.255e-09
rs3130574	6	31048773		A	G	0.8805	-0.3184	0.053	1.83e-09
rs3131920	6	31051131		T	G	0.8805	-0.3193	0.053	1.683e-09
rs3131788	6	31057019		A	G	0.12	0.3242	0.0528	8.261e-10
rs3131794	6	31067614		T	G	0.1225	0.3215	0.0552	5.666e-09
rs3094671	6	31076686		T	C	0.88	-0.3265	0.0529	6.618e-10
rs3095311	6	31083898		A	G	0.8802	-0.3227	0.0528	9.648e-10
rs3130544	6	31090563		A	C	0.1195	0.3266	0.053	7.27e-10
rs2535296	6	31092442		A	G	0.8443	-0.2521	0.0453	2.687e-08
rs3094087	6	31093784		T	C	0.8612	-0.288	0.0478	1.678e-09
rs3130968	6	31097294		T	C	0.1383	0.2863	0.0479	2.347e-09
rs201376697	6	31098850		G	GACA	0.1271	0.3074	0.0538	1.142e-08
rs144846110	6	31098856		A	G	0.8756	-0.3089	0.0539	9.727e-09
rs539354792	6	31104918		T	C	0.8806	-0.3214	0.0556	7.664e-09
rs3132556	6	31111032		A	T	0.8304	-0.2387	0.042	1.304e-08
rs2233980	6	31111867		A	G	0.1201	0.3284	0.0529	5.349e-10
rs2233974	6	31112239		C	G	0.8387	-0.2503	0.043	5.881e-09
rs3094222	6	31113657		A	G	0.8799	-0.3099	0.0513	1.559e-09
rs3130985	6	31117579		T	C	0.1198	0.3238	0.0524	6.317e-10
rs3130557	6	31126926		T	C	0.1198	0.32	0.0525	1.102e-09
rs3132541	6	31130957		A	C	0.8801	-0.3193	0.0525	1.15e-09
rs3130562	6	31133197		T	C	0.8801	-0.3197	0.0525	1.102e-09
rs7750641	6	31161533		T	C	0.1202	0.3301	0.0529	4.344e-10
rs1619179	6	31208169		A	C	0.8795	-0.3297	0.0528	4.242e-10
rs1639109	6	31226806		A	G	0.121	0.3343	0.0553	1.522e-09
rs1639108	6	31228777		T	C	0.8796	-0.3282	0.0526	4.554e-10
rs2524086	6	31273534		A	G	0.8506	-0.2626	0.045	5.384e-09
rs2853949	6	31273887		A	G	0.1495	0.2624	0.045	5.54e-09
rs2524078	6	31274872		A	G	0.8522	-0.2651	0.0454	5.195e-09
rs2844614	6	31275763		A	G	0.1493	0.2634	0.0451	5.083e-09
rs2844613	6	31276069		T	G	0.1482	0.2686	0.0452	2.846e-09
rs2524069	6	31277012		A	T	0.8555	-0.2971	0.046	1.091e-10
rs2853947	6	31278019		T	C	0.148	0.2732	0.0447	9.68e-10
rs2524067	6	31278044		A	G	0.852	-0.2732	0.0447	9.704e-10
rs2524065	6	31278547		A	C	0.852	-0.2735	0.0447	9.206e-10
rs2844609	6	31279613		A	G	0.1479	0.2757	0.0447	6.838e-10
rs2853945	6	31279959		T	C	0.852	-0.2739	0.0447	8.72e-10
rs2853942	6	31280392		T	C	0.148	0.2739	0.0447	8.746e-10
rs2253491	6	31281440		A	G	0.1819	0.2469	0.0403	9.262e-10
rs7748141	6	31321100		T	C	0.8858	-0.3917	0.0536	2.802e-13
rs9265645	6	31332420		A	G	0.116	0.3735	0.052	6.821e-13
rs4947307	6	31334488		A	G	0.8965	-0.406	0.0576	1.731e-12
rs1625792	6	31338643		A	G	0.1162	0.3758	0.0518	4.106e-13
rs2854019	6	31340699		A	T	0.1179	0.369	0.0544	1.141e-11
rs2854018	6	31340785		T	C	0.1133	0.3679	0.0555	3.5e-11
rs402175	6	31340940		A	G	0.1161	0.3743	0.0519	5.534e-13
rs1634776	6	31341211		T	C	0.1197	0.3735	0.0515	4.154e-13
rs3132474	6	31342008		A	G	0.1197	0.3697	0.0543	9.491e-12
rs9265831	6	31343672		A	T	0.1198	0.3662	0.0543	1.58e-11
rs2394976	6	31344135		T	G	0.1255	0.2809	0.0462	1.152e-09
rs2256747	6	31344173		T	C	0.8839	-0.3745	0.0519	5.145e-13
rs2256750	6	31344243		A	G	0.1162	0.3739	0.0519	5.576e-13
rs2844589	6	31344482		A	G	0.1161	0.3744	0.0519	5.187e-13
rs3134792	6	31344549		T	G	0.8838	-0.3741	0.0518	5.397e-13
rs2854010	6	31344715		A	G	0.8841	-0.3771	0.052	4.063e-13
rs9265857	6	31344830		C	G	0.116	0.3752	0.0519	5.075e-13
rs2394978	6	31344879		T	C	0.1161	0.3748	0.0519	5.069e-13
rs2394979	6	31344952		A	G	0.118	0.3694	0.0544	1.093e-11
rs2394980	6	31345164		T	C	0.1161	0.3751	0.0519	4.774e-13
rs2394981	6	31345252		T	G	0.1181	0.3695	0.0544	1.084e-11
rs9265886	6	31345444		A	C	0.8821	-0.3699	0.0544	1.023e-11
rs7450305	6	31345590		T	C	0.8809	-0.3672	0.0543	1.36e-11
rs9265908	6	31345900		T	C	0.1161	0.3757	0.0519	4.39e-13
rs9265910	6	31345945		T	C	0.1179	0.3698	0.0544	1.035e-11
rs7749555	6	31346497		A	G	0.8852	-0.3737	0.0552	1.261e-11
rs2507998	6	31346875		A	G	0.8839	-0.3767	0.0519	3.845e-13
rs9265937	6	31347161		T	C	0.1165	0.3764	0.0519	4.166e-13
rs9265938	6	31347228		T	C	0.1164	0.3784	0.0519	3.219e-13
rs9265939	6	31347250		A	G	0.8835	-0.3782	0.0519	3.344e-13
rs9265942	6	31347281		C	G	0.8912	-0.3747	0.057	4.831e-11
rs9265946	6	31347361		A	G	0.1161	0.3718	0.0551	1.483e-11
rs9265948	6	31347416		T	C	0.1156	0.3826	0.0523	2.631e-13
rs9265949	6	31347452		T	C	0.1142	0.3949	0.0536	1.712e-13
rs9265964	6	31347841		A	G	0.8839	-0.3768	0.0519	3.796e-13
rs9265965	6	31347852		T	C	0.8889	-0.3855	0.0561	6.36e-12
rs9265967	6	31347872		T	G	0.1148	0.3696	0.0551	1.936e-11
rs9265968	6	31347886		A	T	0.8878	-0.3749	0.0557	1.699e-11
rs9265969	6	31347929		A	G	0.1245	0.2767	0.0453	9.785e-10
rs9265971	6	31348015		T	C	0.8841	-0.3776	0.0519	3.566e-13
rs9265972	6	31348028		C	G	0.116	0.3774	0.0519	3.617e-13
rs9265973	6	31348084		A	G	0.1159	0.3776	0.0519	3.575e-13
rs9265974	6	31348102		T	G	0.8841	-0.3776	0.0519	3.569e-13
rs9265976	6	31348156		A	G	0.8847	-0.3791	0.0525	5.162e-13
rs9265979	6	31348267		T	C	0.1158	0.3781	0.0521	4.078e-13
rs9265982	6	31348303		T	C	0.1163	0.3743	0.0519	5.443e-13
rs9265985	6	31348457		A	C	0.884	-0.3754	0.0519	4.69e-13
rs9265990	6	31348671		A	T	0.115	0.3818	0.0527	4.422e-13
rs9265993	6	31348743		A	G	0.1174	0.3723	0.0546	9.331e-12
rs9265994	6	31348749		T	C	0.8906	-0.3971	0.0553	6.84e-13
rs9265998	6	31348836		A	G	0.1156	0.3823	0.0523	2.701e-13
rs9266001	6	31348918		A	C	0.1146	0.3932	0.0537	2.488e-13
rs2923008	6	31349134		T	G	0.1147	0.3931	0.0537	2.526e-13
rs3016017	6	31349286		A	G	0.8839	-0.3755	0.0519	4.499e-13
rs2923007	6	31349288		T	C	0.8839	-0.3755	0.0519	4.5e-13
rs2596510	6	31350531		T	G	0.1176	0.3704	0.0508	3.135e-13
rs2596508	6	31350655		T	C	0.8825	-0.3725	0.0509	2.455e-13
rs2854002	6	31350928		A	G	0.8548	-0.3062	0.0459	2.436e-11
rs2596505	6	31351008		T	C	0.1496	0.3019	0.0448	1.64e-11
rs2596504	6	31351252		T	C	0.1466	0.2994	0.0457	5.755e-11
rs2507995	6	31351438		C	G	0.1454	0.3066	0.0458	2.227e-11
rs2442729	6	31351449		T	C	0.1543	0.2989	0.0446	2.047e-11
rs9266066	6	31351748		T	C	0.1454	0.3079	0.0459	1.885e-11
rs9266070	6	31351841		A	T	0.1453	0.3087	0.0459	1.722e-11
rs2442727	6	31351890		A	G	0.1432	0.3123	0.0461	1.238e-11
rs36057735	6	31352146		C	G	0.8455	-0.2223	0.038	4.741e-09
rs2596500	6	31353490		A	C	0.8854	-0.3926	0.0533	1.784e-13
rs2853999	6	31358297		A	T	0.8859	-0.4007	0.0537	8.535e-14
rs2523593	6	31358926		T	C	0.8856	-0.3991	0.0535	8.39e-14
rs2523584	6	31360113		A	G	0.8857	-0.3999	0.0535	7.631e-14
rs2523573	6	31361211		C	G	0.8855	-0.4008	0.0535	6.56e-14
rs2596545	6	31361597		A	C	0.8856	-0.4035	0.0534	4.28e-14
rs2596547	6	31361865		T	C	0.1	0.3555	0.0484	2.057e-13
rs2523571	6	31361914		A	T	0.1002	0.3585	0.0485	1.383e-13
rs2523569	6	31362144		T	G	0.8145	-0.2082	0.0355	4.363e-09
rs2523568	6	31362155		A	G	0.1855	0.2075	0.0355	4.932e-09
rs2523567	6	31362238		C	G	0.8147	-0.2091	0.0355	3.754e-09
rs2250284	6	31362362		A	G	0.8145	-0.208	0.0355	4.489e-09
rs2250293	6	31362582		T	C	0.1802	0.2119	0.0359	3.689e-09
rs2523563	6	31362834		A	C	0.1803	0.2115	0.0359	3.944e-09
rs2250399	6	31363318		A	G	0.1804	0.2114	0.0359	4.041e-09
rs2523552	6	31364177		T	C	0.1802	0.2091	0.0359	5.596e-09
rs2844583	6	31364200		T	G	0.18	0.2118	0.0359	3.784e-09
rs2853997	6	31364479		A	C	0.18	0.2118	0.0359	3.777e-09
rs2523549	6	31364719		A	G	0.18	0.2117	0.0359	3.782e-09
rs2844581	6	31364926		A	C	0.8203	-0.2117	0.036	3.968e-09
rs2523546	6	31365143		A	G	0.1188	0.3808	0.0524	3.536e-13
rs2853995	6	31365242		T	C	0.6738	-0.1904	0.032	2.825e-09
rs2428490	6	31365318		A	G	0.1797	0.2115	0.036	4.073e-09
rs2523544	6	31365785		A	G	0.2497	0.1661	0.0281	3.25e-09
rs2844577	6	31366645		T	C	0.8812	-0.3784	0.0524	4.992e-13
rs2596430	6	31367654		T	C	0.8812	-0.3811	0.0524	3.437e-13
rs2922994	6	31368124		A	G	0.8638	-0.4015	0.0717	2.177e-08
rs2156874	6	31368199		C	G	0.1142	0.3977	0.0534	9.079e-14
rs2853986	6	31371067		T	C	0.8839	-0.3964	0.0531	8.239e-14
rs2523524	6	31372219		A	G	0.1208	0.3807	0.052	2.585e-13
rs2844559	6	31372298		T	C	0.1208	0.38	0.052	2.815e-13
rs2905719	6	31376613		A	G	0.8813	-0.3812	0.0524	3.448e-13
rs2442735	6	31378876		A	G	0.8812	-0.3811	0.0524	3.427e-13
rs9279179	6	31379072		CG	C	0.8794	-0.3683	0.0547	1.629e-11
rs4143332	6	31380588		A	G	0.1324	0.4047	0.0734	3.5e-08
rs4143333	6	31380742		A	G	0.8947	-0.3984	0.0565	1.798e-12
rs2844531	6	31385394		A	G	0.8858	-0.3943	0.0534	1.483e-13
rs2596565	6	31385552		A	G	0.1143	0.3942	0.0534	1.491e-13
rs2844530	6	31385658		C	G	0.8853	-0.3969	0.0536	1.36e-13
rs2523495	6	31410201		T	C	0.1137	0.4016	0.0535	6.042e-14
rs3132472	6	31418354		A	G	0.1145	0.4059	0.0537	4.103e-14
rs3132473	6	31440552		A	T	0.1141	0.402	0.0534	5.123e-14
rs3093958	6	31442744		A	G	0.8842	-0.3974	0.0544	2.893e-13
rs9267092	6	31446464		T	G	0.1145	0.4051	0.0536	4.178e-14
rs3131623	6	31451033		A	T	0.1423	0.2869	0.0474	1.476e-09
rs3093956	6	31459190		T	C	0.8538	-0.2609	0.0462	1.654e-08
rs9267123	6	31459618		C	G	0.1253	0.3719	0.0509	2.723e-13
rs146648476	6	31460969		CATAG	C	0.1415	0.2699	0.0474	1.204e-08
rs3130477	6	31461143		T	C	0.8856	-0.396	0.053	8.173e-14
rs3094228	6	31462150		T	C	0.8289	-0.2359	0.0399	3.426e-09
rs3132089	6	31462233		A	G	0.1135	0.3998	0.0533	6.631e-14
rs3099839	6	31462288		T	C	0.1135	0.3998	0.0533	6.63e-14
rs3094605	6	31462917		C	G	0.1135	0.3994	0.0533	7.081e-14
rs3099840	6	31462944		A	G	0.8289	-0.2356	0.0399	3.628e-09
rs3132090	6	31462975		A	G	0.114	0.4033	0.0536	5.536e-14
rs3130907	6	31464036		A	G	0.8865	-0.3999	0.0533	6.527e-14
rs3094014	6	31465781		A	G	0.1618	0.2499	0.0411	1.202e-09
rs3128986	6	31465916		T	C	0.8676	-0.4044	0.0731	3.107e-08
rs3131620	6	31466054		A	G	0.8384	-0.2489	0.0411	1.46e-09
rs3094604	6	31466334		A	G	0.8411	-0.3123	0.0433	5.762e-13
rs3128987	6	31466421		T	C	0.8382	-0.25	0.0411	1.202e-09
rs3131619	6	31466554		A	T	0.8864	-0.3992	0.0534	7.524e-14
rs3094013	6	31466589		A	G	0.1137	0.4026	0.0534	4.858e-14
rs3094012	6	31466743		C	G	0.118	0.3332	0.0502	3.288e-11
rs3131618	6	31466844		A	G	0.8845	-0.4026	0.0545	1.506e-13
rs3131617	6	31468961		A	T	0.8688	-0.4161	0.0689	1.544e-09
rs3131643	6	31475005		A	G	0.1385	0.3516	0.0466	4.629e-14
rs2523654	6	31477127		C	G	0.3703	0.1448	0.0251	7.976e-09
rs2516435	6	31477157		A	C	0.3703	0.1448	0.0251	7.918e-09
rs2516515	6	31477190		A	C	0.6297	-0.145	0.0251	7.52e-09
rs2844502	6	31477439		A	G	0.3704	0.1445	0.0251	8.523e-09
rs2248251	6	31477721		A	G	0.3706	0.1441	0.0251	9.353e-09
rs2395488	6	31478132		A	G	0.6295	-0.1449	0.0251	7.666e-09
rs5875322	6	31478171		G	GTCTTGCT	0.624	-0.164	0.027	1.208e-09
rs2395489	6	31478230		T	C	0.63	-0.1454	0.0251	6.903e-09
rs2248351	6	31478232		A	C	0.6242	-0.163	0.027	1.532e-09
rs2248352	6	31478241		A	G	0.6338	-0.1478	0.0252	4.293e-09
rs2905726	6	31478311		C	G	0.3702	0.1449	0.0251	7.683e-09
rs2904778	6	31478312		C	G	0.6239	-0.1624	0.027	1.717e-09
rs2904777	6	31478352		T	C	0.6296	-0.1449	0.0251	7.637e-09
rs2516425	6	31478423		A	G	0.6296	-0.1446	0.0251	8.249e-09
rs533418648	6	31478445		G	GAGA	0.3764	0.1625	0.0269	1.656e-09
rs2248459	6	31478933		A	G	0.6301	-0.1446	0.0251	8.106e-09
rs2243429	6	31479043		T	G	0.3705	0.1444	0.0251	8.477e-09
rs2596536	6	31480071		T	C	0.3708	0.1434	0.0251	1.081e-08
rs2516424	6	31480538		A	G	0.6295	-0.1443	0.0251	8.616e-09
rs2248613	6	31480655		T	G	0.3706	0.1443	0.0251	8.56e-09
rs2248617	6	31480756		T	C	0.3706	0.1442	0.0251	8.802e-09
rs3099843	6	31480787		T	G	0.1216	0.3942	0.0499	2.814e-15
rs3099844	6	31481199		A	C	0.1216	0.3939	0.0499	2.952e-15
rs2248709	6	31481269		A	G	0.6682	-0.2052	0.032	1.488e-10
rs3130908	6	31481775		T	C	0.8846	-0.3996	0.0513	6.676e-15
rs3130909	6	31481933		T	C	0.8848	-0.4032	0.0513	4.03e-15
rs3131642	6	31482860		A	G	0.1215	0.3924	0.0499	3.856e-15
rs3132470	6	31483593		A	G	0.8816	-0.3915	0.0505	9.163e-15
rs3094011	6	31484059		T	C	0.8784	-0.3942	0.05	3.019e-15
rs3094010	6	31484071		T	C	0.1216	0.3942	0.05	3.022e-15
rs28405701	6	31484313		A	G	0.3399	0.1422	0.0257	3.21e-08
rs68045865	6	31488902		T	TG	0.1433	0.4415	0.0758	5.827e-09
rs2905724	6	31491177		A	G	0.3139	0.2046	0.0328	4.316e-10
rs3130923	6	31494358		A	G	0.1158	0.392	0.0513	2.092e-14
rs3094005	6	31497270		T	G	0.1157	0.3867	0.0513	4.71e-14
rs3095233	6	31501997		A	G	0.8843	-0.3899	0.0513	2.846e-14
rs3130616	6	31505969		A	G	0.1157	0.3898	0.0513	2.892e-14
rs3134900	6	31506180		C	G	0.8812	-0.3803	0.0505	5.313e-14
rs3130614	6	31508681		A	T	0.1112	0.439	0.0537	2.869e-16
rs2246618	6	31511209		T	C	0.269	0.1518	0.0278	4.947e-08
rs3130612	6	31514320		T	G	0.888	-0.433	0.0542	1.307e-15
rs9267445	6	31515704		C	G	0.1151	0.4038	0.0515	4.43e-15
rs529792575	6	31530467		G	GC	0.8834	-0.3995	0.0548	3.01e-13
rs1055384	6	31533781		T	C	0.1576	0.2457	0.0444	3.039e-08
rs2734583	6	31537703		A	G	0.8836	-0.397	0.051	7.33e-15
rs9267488	6	31546470		A	G	0.885	-0.3959	0.0515	1.548e-14
rs1800628	6	31579073		A	G	0.111	0.4403	0.0537	2.589e-16
rs3130063	6	31590925		T	C	0.1138	0.4005	0.052	1.378e-14
rs3130631	6	31598391		C	G	0.8862	-0.3994	0.0521	1.714e-14
rs3132451	6	31614248		C	G	0.1897	0.266	0.0399	2.676e-11
rs3130621	6	31619306		T	C	0.8178	-0.2814	0.0406	4.423e-12
rs3130070	6	31624031		A	G	0.8176	-0.2827	0.0406	3.52e-12
rs3130622	6	31624747		C	G	0.182	0.2841	0.0407	2.829e-12
rs3115664	6	31624859		T	C	0.1822	0.2824	0.0406	3.705e-12
rs3132450	6	31628361		A	G	0.8926	-0.4585	0.054	2.016e-17
rs3130623	6	31629923		T	C	0.1908	0.2581	0.0399	1.039e-10
rs3130624	6	31630098		A	G	0.8168	-0.2763	0.0406	9.694e-12
rs3130626	6	31630712		A	G	0.818	-0.2814	0.0406	4.415e-12
rs2736157	6	31633043		A	G	0.8179	-0.2827	0.0406	3.463e-12
rs3130627	6	31633074		T	G	0.182	0.2798	0.0406	5.745e-12
rs3115663	6	31634066		T	C	0.8172	-0.2825	0.0405	3.02e-12
rs11229	6	31635993		A	G	0.8178	-0.2796	0.0406	5.81e-12
rs10885	6	31636814		T	C	0.182	0.279	0.0406	6.555e-12
rs3130046	6	31638621		C	G	0.818	-0.2808	0.0407	4.98e-12
rs570358423	6	31639124		CAAAG	C	0.1816	0.3188	0.0447	9.89e-13
rs554994006	6	31639319		T	TC	0.8187	-0.3215	0.047	8.214e-12
rs3130628	6	31641495		T	C	0.8148	-0.2731	0.0404	1.373e-11
rs3130047	6	31642702		T	C	0.1821	0.2801	0.0406	5.489e-12
rs3117583	6	31651799		A	G	0.8179	-0.2818	0.0406	4.036e-12
rs549786850	6	31652706		T	TC	0.1913	0.3574	0.0639	2.194e-08
rs3117582	6	31652743		T	G	0.8928	-0.4616	0.0539	1.061e-17
rs3117581	6	31657087		A	G	0.893	-0.4527	0.0536	3.108e-17
rs3132449	6	31658236		T	C	0.107	0.4534	0.0536	2.719e-17
rs3130618	6	31664357		A	C	0.1821	0.2806	0.0406	4.953e-12
rs3117579	6	31665719		T	G	0.182	0.2796	0.0406	6.047e-12
rs9267531	6	31668965		A	G	0.893	-0.4546	0.0536	2.146e-17
rs9267539	6	31698647		A	C	0.8931	-0.4575	0.0537	1.599e-17
rs9267544	6	31703780		A	C	0.1068	0.4685	0.054	4.336e-18
rs9267549	6	31709614		A	G	0.1067	0.4627	0.0537	6.852e-18
rs3131383	6	31736517		T	G	0.1069	0.4488	0.0532	3.234e-17
rs3101018	6	31738087		T	C	0.1071	0.4721	0.0539	1.914e-18
rs3131381	6	31740686		A	C	0.1068	0.4517	0.0532	1.993e-17
rs3131380	6	31742001		A	G	0.8931	-0.4512	0.0532	2.154e-17
rs3132445	6	31744419		A	G	0.1068	0.4502	0.0532	2.641e-17
rs3132443	6	31746254		A	G	0.1068	0.4592	0.0535	8.697e-18
rs3130484	6	31748105		T	C	0.8931	-0.4495	0.0532	2.911e-17
rs3117573	6	31750619		C	G	0.8931	-0.4592	0.0535	8.654e-18
rs3131379	6	31753256		A	G	0.1069	0.4508	0.0532	2.272e-17
rs3117574	6	31757453		A	G	0.1069	0.4493	0.0532	2.963e-17
rs3131378	6	31757508		A	G	0.8931	-0.4495	0.0532	2.882e-17
rs3117575	6	31758476		T	C	0.893	-0.4565	0.0535	1.369e-17
rs3117576	6	31759017		T	C	0.8931	-0.4542	0.0532	1.329e-17
rs3117577	6	31759697		A	G	0.8928	-0.471	0.0539	2.225e-18
rs3115672	6	31760120		T	C	0.1069	0.4491	0.0532	3.065e-17
rs3101017	6	31765689		T	C	0.8932	-0.4529	0.0532	1.698e-17
rs533434563	6	31766173		CAG	C	0.891	-0.4896	0.0561	2.575e-18
rs3115671	6	31766568		T	G	0.1068	0.4566	0.0532	8.719e-18
rs3130490	6	31771343		T	G	0.1068	0.4527	0.0532	1.791e-17
rs3130491	6	31777687		A	G	0.1078	0.4639	0.0554	5.242e-17
rs915652	6	31781365		A	G	0.1086	0.4738	0.0552	8.938e-18
rs915651	6	31781407		A	G	0.1057	0.4656	0.0537	4.327e-18
rs2753961	6	31787053		T	C	0.8715	-0.5416	0.0823	4.55e-11
rs2607014	6	31793436		A	G	0.1067	0.466	0.0535	2.958e-18
rs533681143	6	31798087		A	T	0.1411	0.5196	0.0797	6.941e-11
rs2736425	6	31798207		A	G	0.1067	0.4658	0.0535	3.092e-18
rs2763980	6	31798883		T	C	0.1069	0.4808	0.0539	4.725e-19
rs553331667	6	31799896		T	TA	0.8904	-0.4785	0.056	1.253e-17
rs681331	6	31801022		A	C	0.8794	-0.4912	0.0743	3.842e-11
rs625421	6	31804316		A	C	0.1067	0.4656	0.0535	3.161e-18
rs553414	6	31809415		A	G	0.8934	-0.4683	0.0535	1.944e-18
rs1265947	6	31819390		T	C	0.1066	0.4698	0.0534	1.462e-18
rs144929896	6	31830357		T	TA	0.1087	0.4907	0.0562	2.523e-18
rs3115674	6	31831299		T	G	0.885	-0.4199	0.0511	2.043e-16
rs3130476	6	31834324		T	C	0.1067	0.4686	0.0535	1.841e-18
rs3130478	6	31838136		T	C	0.1102	0.4746	0.0549	5.582e-18
rs3130679	6	31839763		A	G	0.8903	-0.4758	0.0549	4.527e-18
rs599707	6	31840659		T	C	0.1067	0.4682	0.0535	1.983e-18
rs9267574	6	31842835		T	C	0.1067	0.4684	0.0535	1.982e-18
rs9267578	6	31850331		T	C	0.1094	0.4766	0.055	4.38e-18
rs67682613	6	31858928		A	G	0.1229	0.2148	0.0387	2.835e-08
rs515688	6	31864261		A	G	0.8931	-0.4593	0.0531	5.179e-18
rs693906	6	31867387		C	G	0.1231	0.2147	0.0387	2.951e-08
rs501942	6	31872700		T	C	0.1064	0.4711	0.0535	1.348e-18
rs558702	6	31902549		A	G	0.1064	0.4676	0.0534	1.921e-18
rs519417	6	31910656		A	G	0.1062	0.4652	0.0535	3.596e-18
rs497309	6	31924707		A	C	0.8938	-0.4696	0.0535	1.63e-18
rs1265905	6	31942164		A	G	0.8812	-0.4853	0.075	1.001e-10
rs1270942	6	31951083		A	G	0.8938	-0.4726	0.0535	9.487e-19
rs389884	6	31973120		A	G	0.8934	-0.4779	0.0538	6.238e-19
-	6	32037490		T	C	0.1062	0.4811	0.0562	1.093e-17
rs433061	6	32047051		A	G	0.1088	0.4768	0.055	4.468e-18
rs367364	6	32052169		T	C	0.1286	0.4034	0.0436	2.258e-20
rs527506034	6	32052461		A	G	0.8437	-0.3995	0.0628	2.051e-10
rs394439	6	32057778		A	C	0.1285	0.4036	0.0436	2.111e-20
rs369637	6	32058086		T	C	0.1286	0.4041	0.0436	1.93e-20
rs1150758	6	32060372		C	G	0.1287	0.4031	0.0436	2.265e-20
rs1150757	6	32061428		A	G	0.1089	0.4756	0.055	4.923e-18
rs1265889	6	32065839		A	G	0.1285	0.4054	0.0436	1.416e-20
rs1150756	6	32067917		T	C	0.109	0.4739	0.0548	5.496e-18
rs1150755	6	32070773		T	C	0.1284	0.404	0.0435	1.442e-20
rs1150754	6	32082981		T	C	0.1284	0.404	0.0436	1.858e-20
rs1150753	6	32092090		A	G	0.8911	-0.4754	0.0549	5.111e-18
rs1150752	6	32096949		T	C	0.891	-0.4705	0.055	1.245e-17
rs1265888	6	32098670		A	G	0.1359	0.2593	0.0365	1.194e-12
rs572735132	6	32099726		G	GA	0.186	0.4267	0.0693	7.505e-10
rs1269852	6	32112414		C	G	0.1087	0.4704	0.055	1.201e-17
rs3130288	6	32128224		A	C	0.1264	0.4985	0.0785	2.144e-10
rs3134962	6	32140074		A	G	0.134	0.4045	0.0449	2.072e-19
rs539526798	6	32160342		G	GC	0.1932	0.263	0.0437	1.729e-09
rs3132941	6	32164195		C	G	0.1099	0.466	0.0546	1.481e-17
rs9267816	6	32165367		T	C	0.8068	-0.2648	0.0437	1.385e-09
rs3134941	6	32181760		C	G	0.832	-0.2343	0.042	2.34e-08
rs169504	6	32185629		A	C	0.1795	0.3277	0.0419	5.284e-15
rs3134942	6	32200994		T	G	0.1325	0.343	0.0472	3.688e-13
rs538082098	6	32203357		T	TA	0.8706	-0.3024	0.0407	1.025e-13
rs3131296	6	32205216		T	C	0.1327	0.3412	0.0472	4.834e-13
rs3132956	6	32211661		A	G	0.1328	0.3444	0.0472	2.945e-13
rs8192589	6	32219860		T	G	0.1274	0.3442	0.0487	1.506e-12
rs3134796	6	32222144		A	G	0.8669	-0.3551	0.0471	4.828e-14
rs3134930	6	32223843		T	C	0.2187	0.1732	0.0294	3.757e-09
rs3096690	6	32226853		C	G	0.1107	0.4617	0.0539	1.127e-17
rs3130297	6	32231204		T	C	0.1118	0.4703	0.0539	2.658e-18
rs377763	6	32231367		A	C	0.1867	0.1858	0.0312	2.621e-09
rs6918888	6	32233502		C	G	0.1437	0.3147	0.0446	1.713e-12
rs9267893	6	32234444		A	T	0.7895	-0.3508	0.0621	1.652e-08
rs138828503	6	32236099		A	G	0.843	-0.3874	0.0695	2.52e-08
rs3134925	6	32236880		A	G	0.1437	0.3144	0.0446	1.809e-12
rs3134924	6	32236907		T	G	0.1437	0.3143	0.0446	1.824e-12
rs527749768	6	32237042		CG	C	0.8541	-0.366	0.0484	3.75e-14
rs561980536	6	32237795		G	GAT	0.8432	-0.3885	0.0696	2.436e-08
rs3130303	6	32238090		A	G	0.8563	-0.3136	0.0446	2.009e-12
rs6901158	6	32238165		T	C	0.1441	0.3133	0.0445	1.935e-12
rs9267920	6	32238466		T	C	0.1548	0.3222	0.0472	8.29e-12
rs3130304	6	32239404		A	G	0.1771	0.2229	0.0326	8.518e-12
rs416352	6	32239616		T	G	0.341	0.1765	0.0258	8.421e-12
rs393481	6	32240182		T	C	0.6572	-0.1767	0.0258	7.861e-12
rs424232	6	32240547		T	C	0.2606	0.1716	0.0278	6.279e-10
rs376549	6	32240920		T	C	0.6342	-0.1421	0.0257	3.165e-08
rs394038	6	32240921		A	G	0.2825	0.1513	0.0274	3.17e-08
rs507778	6	32242084		T	C	0.3444	0.182	0.0257	1.476e-12
rs529729079	6	32250343		A	G	0.1256	0.513	0.0783	5.766e-11
rs558281186	6	32252121		A	G	0.1258	0.5171	0.0783	3.9e-11
rs9268026	6	32258704		A	G	0.8896	-0.4803	0.0544	9.986e-19
rs146576271	6	32262212		T	TG	0.1112	0.4789	0.0563	1.867e-17
rs3132971	6	32262479		T	G	0.8895	-0.4781	0.0543	1.282e-18
rs9268075	6	32265323		T	G	0.1112	0.4789	0.0563	1.869e-17
rs3115556	6	32272295		A	T	0.1105	0.476	0.0543	1.851e-18
rs9268123	6	32284355		A	G	0.8895	-0.4761	0.0543	1.806e-18
rs9268144	6	32289422		T	C	0.8895	-0.4761	0.0543	1.827e-18
-	6	32290353		G	GCAAA	0.0965	0.4411	0.0753	4.801e-09
rs7775397	6	32293475		T	G	0.8895	-0.4757	0.0543	1.944e-18
rs9268152	6	32295886		T	C	0.1106	0.4757	0.0543	1.934e-18
rs9268158	6	32301680		T	C	0.1105	0.4758	0.0543	1.918e-18
rs9268177	6	32307105		A	C	0.1105	0.4772	0.0543	1.45e-18
rs9268178	6	32307844		T	C	0.1105	0.4772	0.0543	1.452e-18
rs9268193	6	32309594		A	C	0.8702	-0.5271	0.0848	5.132e-10
rs9268208	6	32312814		T	C	0.8785	-0.5323	0.0809	4.7e-11
rs9268219	6	32316331		T	G	0.8926	-0.4636	0.0546	2.186e-17
rs116667074	6	32317585		T	C	0.1105	0.477	0.0543	1.494e-18
rs7751715	6	32321175		A	G	0.1105	0.4771	0.0543	1.476e-18
rs9268235	6	32322431		T	C	0.1119	0.4715	0.0537	1.688e-18
rs4392743	6	32327875		T	C	0.8895	-0.4759	0.0543	1.867e-18
rs541192549	6	32334326		T	TTG	0.1111	0.4783	0.0564	2.201e-17
rs1265757	6	32334605		T	C	0.1105	0.4781	0.0543	1.279e-18
rs1265754	6	32335915		A	T	0.1107	0.4735	0.0542	2.479e-18
rs926593	6	32337767		A	G	0.8895	-0.4782	0.0543	1.259e-18
rs2849018	6	32343086		T	C	0.8894	-0.4773	0.0543	1.422e-18
rs910051	6	32347734		T	G	0.8895	-0.4779	0.0543	1.312e-18
rs2395149	6	32357785		A	G	0.1105	0.4755	0.0543	1.97e-18
rs3129927	6	32366050		A	C	0.8743	-0.513	0.0783	5.644e-11
rs3117109	6	32373094		T	C	0.1071	0.4739	0.0546	3.765e-18
rs2894251	6	32375459		A	G	0.8842	-0.386	0.0504	1.809e-14
rs2395151	6	32375562		A	G	0.1158	0.386	0.0504	1.812e-14
rs3117106	6	32375592		T	C	0.8392	-0.2129	0.0346	7.406e-10
rs2894254	6	32377912		T	G	0.8897	-0.4664	0.0542	8.011e-18
rs150353632	6	32378686		A	ATTTTGTG	0.117	0.4114	0.054	2.557e-14
rs200411589	6	32379293		A	AAT	0.1107	0.475	0.0564	3.601e-17
rs3117103	6	32381780		A	T	0.884	-0.386	0.0503	1.738e-14
rs9268469	6	32385813		A	G	0.1418	0.2395	0.0376	1.816e-10
rs3129950	6	32390424		C	G	0.1101	0.4665	0.0543	8.364e-18
rs3117097	6	32390912		A	G	0.8633	-0.2371	0.0413	9.246e-09
rs1980493	6	32395438		T	C	0.8633	-0.2377	0.0412	8.192e-09
rs3129956	6	32400685		A	G	0.1251	0.4937	0.0781	2.616e-10
rs2395158	6	32406818		A	G	0.8634	-0.2358	0.0413	1.12e-08
rs3129959	6	32408019		A	T	0.8634	-0.2361	0.0413	1.077e-08
rs7773668	6	32410047		C	G	0.8707	-0.5169	0.0848	1.08e-09
rs9268510	6	32410726		A	G	0.1293	0.5168	0.0848	1.086e-09
rs3129962	6	32411606		A	G	0.1103	0.47	0.0545	6.097e-18
rs3129966	6	32413503		C	G	0.11	0.4679	0.0544	7.771e-18
rs2227138	6	32416723		T	C	0.1317	0.2873	0.0436	4.622e-11
rs3135371	6	32418922		A	G	0.8739	-0.2861	0.041	2.944e-12
rs2395160	6	32419655		A	G	0.1099	0.4654	0.0544	1.234e-17
rs3135353	6	32425100		T	C	0.1309	0.2897	0.0438	3.607e-11
rs2105902	6	32427921		A	T	0.8692	-0.2883	0.0438	4.585e-11
rs3129843	6	32427949		A	G	0.89	-0.4652	0.0544	1.25e-17
rs3129855	6	32431064		A	G	0.8751	-0.4979	0.0783	2.011e-10
rs3129856	6	32431560		T	C	0.8901	-0.4637	0.0544	1.594e-17
rs3129861	6	32433755		A	T	0.1309	0.2876	0.0438	5.084e-11
rs3135394	6	32440720		A	G	0.8898	-0.4685	0.0544	6.793e-18
rs7383481	6	32446658		T	C	0.1099	0.4711	0.0544	4.794e-18
rs574185477	6	32449206		T	G	0.1288	0.5371	0.0851	2.703e-10
rs3129897	6	32453692		A	G	0.1303	0.289	0.044	5.259e-11
rs9268813	6	32456817		T	C	0.8924	-0.4715	0.0549	9.367e-18
rs7763411	6	32457215		T	C	0.1098	0.4725	0.0545	4.188e-18
rs9269032	6	32469977		A	G	0.102	0.4927	0.0594	1.109e-16
rs564573434	6	32475738		G	GA	0.1164	0.5653	0.093	1.227e-09
rs7747236	6	32534622		T	C	0.134	0.4836	0.0859	1.818e-08
rs1894553	6	32535089		A	C	0.1395	0.473	0.0852	2.78e-08
rs115938440	6	32535643		A	C	0.1325	0.4779	0.0873	4.367e-08
rs116765893	6	32535668		A	T	0.1325	0.478	0.0873	4.355e-08
rs559469172	6	32535712		A	G	0.1341	0.4848	0.0871	2.648e-08
rs115250958	6	32542065		A	C	0.1157	0.6126	0.1022	2.046e-09
rs116105128	6	32543679		C	G	0.1191	0.548	0.0969	1.582e-08
rs11756657	6	32544514		C	G	0.8591	-0.5257	0.0899	5.006e-09
rs116312062	6	32559268		T	G	0.8658	-0.5109	0.0922	3.035e-08
rs9270475	6	32591230		A	T	0.8217	-0.2819	0.0374	4.706e-14
rs9270493	6	32591333		T	C	0.8178	-0.2574	0.0344	7.466e-14
rs7768875	6	32592975		T	C	0.2885	0.1748	0.0315	2.97e-08
rs4713552	6	32593207		T	C	0.1704	0.2534	0.0449	1.721e-08
rs9270573	6	32593237		T	G	0.829	-0.2941	0.0363	5.064e-16
rs9279765	6	32593242		A	AC	0.1488	0.271	0.0431	3.119e-10
rs9270600	6	32593916		T	C	0.2321	0.2407	0.0324	1.025e-13
rs3998182	6	32594138		T	C	0.8091	-0.2794	0.0358	5.642e-15
rs9270611	6	32597298		T	C	0.2264	0.2505	0.0325	1.332e-14
rs9270620	6	32597495		A	T	0.1726	0.2919	0.0359	4.628e-16
rs9270623	6	32597554		A	C	0.8161	-0.2519	0.0334	4.617e-14
rs9270645	6	32597996		T	C	0.801	-0.2459	0.0407	1.449e-09
rs9270662	6	32598312		T	G	0.8269	-0.2917	0.0361	6.484e-16
rs9270665	6	32598455		T	G	0.1838	0.2518	0.0333	4.263e-14
rs4599680	6	32598517		T	C	0.8161	-0.2513	0.0334	4.972e-14
rs76190048	6	32598720		A	G	0.1728	0.2899	0.0359	6.898e-16
rs590999	6	32599731		A	G	0.1793	0.2541	0.0335	3.381e-14
rs592362	6	32600018		A	G	0.7632	-0.1708	0.0289	3.546e-09
rs3998183	6	32600169		T	C	0.2326	0.1839	0.0307	2.196e-09
rs2454137	6	32602372		A	G	0.7563	-0.1834	0.0293	3.861e-10
rs678770	6	32603040		A	T	0.2292	0.1753	0.0294	2.479e-09
rs9270868	6	32603340		A	G	0.8311	-0.2942	0.0369	1.543e-15
rs674313	6	32610305		T	C	0.2503	0.1648	0.0283	5.472e-09
rs1281937	6	32610366		T	C	0.7101	-0.1629	0.0271	1.81e-09
rs2858864	6	32610452		T	C	0.2644	0.1699	0.0285	2.609e-09
rs2858863	6	32610501		T	C	0.2237	0.1837	0.0298	7.262e-10
rs9271187	6	32610537		T	C	0.7201	-0.1731	0.0291	2.536e-09
rs9271188	6	32610543		T	C	0.2799	0.1732	0.0291	2.515e-09
rs9271190	6	32610592		A	C	0.2838	0.1662	0.0272	1.029e-09
rs77064057	6	32610876		A	G	0.7165	-0.1653	0.0272	1.298e-09
rs76946723	6	32611140		A	T	0.7163	-0.1656	0.0272	1.166e-09
rs502771	6	32611193		T	C	0.7163	-0.1654	0.0272	1.242e-09
rs583177	6	32611790		A	C	0.2803	0.1717	0.029	3.329e-09
rs9271237	6	32611874		A	G	0.7192	-0.172	0.029	3.086e-09
rs9271238	6	32611925		T	C	0.3065	0.1537	0.0267	8.436e-09
rs3104421	6	32612230		A	G	0.2805	0.1721	0.029	2.99e-09
rs3104420	6	32612251		A	G	0.2804	0.1721	0.029	3.004e-09
rs80243928	6	32612794		T	C	0.2836	0.1658	0.0272	1.142e-09
rs9271262	6	32612808		A	G	0.7195	-0.172	0.029	3.02e-09
rs79838044	6	32612855		T	C	0.7197	-0.1724	0.029	2.844e-09
rs77568742	6	32613013		T	C	0.7197	-0.1719	0.029	3.236e-09
rs9271268	6	32613029		A	G	0.343	0.1568	0.0277	1.526e-08
rs9271269	6	32613043		T	G	0.3429	0.1568	0.0277	1.519e-08
rs76662008	6	32613092		C	G	0.7205	-0.1743	0.0291	2.118e-09
rs9271272	6	32613117		T	C	0.6911	-0.1535	0.0245	3.635e-10
rs9271273	6	32613125		A	G	0.342	0.1584	0.0278	1.207e-08
rs9271274	6	32613158		A	C	0.6586	-0.1592	0.0278	1.019e-08
rs9271275	6	32613184		A	T	0.6583	-0.1586	0.0279	1.309e-08
rs9271276	6	32613194		A	C	0.6583	-0.1583	0.0279	1.407e-08
rs9271277	6	32613221		T	C	0.6581	-0.1599	0.0279	9.915e-09
rs9271278	6	32613239		A	G	0.6584	-0.1611	0.0279	7.735e-09
rs9271279	6	32613241		A	G	0.6584	-0.1611	0.0279	7.74e-09
rs9271280	6	32613270		A	T	0.2789	0.1762	0.0292	1.541e-09
rs9271281	6	32613282		T	C	0.3416	0.1612	0.0278	6.935e-09
rs9271282	6	32613285		T	C	0.6588	-0.1614	0.0278	6.783e-09
rs9271283	6	32613315		A	T	0.3421	0.1585	0.0278	1.124e-08
rs9271284	6	32613413		T	C	0.6574	-0.1572	0.0277	1.36e-08
rs9271285	6	32613416		A	G	0.6574	-0.1573	0.0277	1.359e-08
rs9271288	6	32613483		A	G	0.6573	-0.1576	0.0277	1.256e-08
rs9271291	6	32613558		A	G	0.3429	0.157	0.0277	1.422e-08
rs9271294	6	32613684		A	G	0.6573	-0.1573	0.0277	1.355e-08
rs9271295	6	32613690		T	C	0.6485	-0.1432	0.026	3.495e-08
rs9271296	6	32613724		A	G	0.6573	-0.1566	0.0277	1.547e-08
rs9271299	6	32613760		C	G	0.343	0.1568	0.0277	1.462e-08
rs9271301	6	32613837		T	C	0.2821	0.1673	0.0273	9.112e-10
rs9271302	6	32613844		T	C	0.6577	-0.158	0.0277	1.231e-08
rs9271304	6	32613871		A	G	0.3419	0.158	0.0278	1.266e-08
rs9271305	6	32613872		T	C	0.3419	0.158	0.0278	1.265e-08
rs9271306	6	32613881		A	G	0.6581	-0.158	0.0278	1.265e-08
rs9271307	6	32613917		A	G	0.3425	0.1572	0.0277	1.346e-08
rs533269560	6	32614068		CG	C	0.3427	0.1571	0.0277	1.35e-08
rs567387425	6	32614173		A	AG	0.3427	0.1571	0.0277	1.343e-08
rs641685	6	32614226		A	G	0.3427	0.1572	0.0277	1.329e-08
rs642093	6	32614298		A	G	0.238	0.1772	0.0287	6.193e-10
rs5004275	6	32614413		A	G	0.3427	0.157	0.0277	1.367e-08
rs550703793	6	32614674		T	C	0.2802	0.1722	0.029	3.084e-09
rs9271324	6	32614705		C	G	0.6593	-0.1619	0.0278	5.754e-09
rs9271326	6	32614750		T	C	0.2805	0.1723	0.029	2.937e-09
rs9271327	6	32614756		C	G	0.3431	0.1569	0.0277	1.461e-08
rs3129752	6	32614850		C	G	0.4971	-0.1477	0.0263	2.089e-08
rs9271329	6	32614858		A	G	0.6569	-0.1564	0.0277	1.614e-08
rs9271330	6	32614863		A	G	0.2504	0.1461	0.0265	3.552e-08
rs9271332	6	32614897		T	C	0.6573	-0.1567	0.0277	1.484e-08
rs9271333	6	32614901		T	C	0.2833	0.166	0.0273	1.117e-09
rs9271334	6	32614934		A	C	0.7165	-0.166	0.0272	1.094e-09
rs9271336	6	32615100		A	G	0.3511	0.1542	0.0277	2.742e-08
rs9271337	6	32615104		T	C	0.3511	0.1542	0.0277	2.753e-08
rs9271338	6	32615108		T	G	0.6489	-0.1542	0.0277	2.742e-08
rs9271339	6	32615114		T	C	0.6489	-0.1542	0.0277	2.763e-08
rs540687976	6	32615161		A	AG	0.2801	0.172	0.0291	3.311e-09
rs3129754	6	32615269		A	G	0.5267	0.1495	0.0247	1.408e-09
rs35558953	6	32615279		T	C	0.4878	-0.1529	0.0265	7.44e-09
rs3129755	6	32615280		A	G	0.4527	0.1543	0.0266	6.716e-09
rs3129756	6	32615286		A	G	0.5382	0.1544	0.0253	1.063e-09
rs9271342	6	32615345		C	G	0.2397	0.175	0.0286	9.725e-10
rs4959103	6	32615348		T	C	0.5029	0.1488	0.0264	1.689e-08
rs4959106	6	32615382		T	C	0.5167	0.1445	0.0246	4.108e-09
rs6931044	6	32615417		T	G	0.4764	-0.151	0.0246	8.042e-10
rs7756741	6	32615421		A	T	0.2351	0.1912	0.0305	3.832e-10
rs28383221	6	32615435		A	G	0.4435	0.1631	0.0247	4.011e-11
rs34850435	6	32615522		T	C	0.4868	-0.1485	0.0245	1.437e-09
rs7760731	6	32615624		A	C	0.2381	0.1769	0.0287	6.729e-10
rs35128369	6	32615626		A	G	0.5022	0.1477	0.0264	2.069e-08
rs35029150	6	32615649		T	G	0.5022	0.1477	0.0264	2.075e-08
rs35928237	6	32615684		T	C	0.4973	-0.1487	0.0264	1.71e-08
rs28383223	6	32615700		T	C	0.5564	-0.1517	0.0266	1.232e-08
rs35534739	6	32615713		A	G	0.5044	0.1499	0.0264	1.365e-08
rs34341844	6	32615719		A	G	0.4966	-0.1478	0.0264	2.066e-08
rs34599306	6	32615780		C	G	0.5039	0.1471	0.0264	2.501e-08
rs28752514	6	32615799		T	C	0.4445	0.1504	0.0267	1.658e-08
rs28752515	6	32615826		A	G	0.5558	-0.1514	0.0266	1.338e-08
rs34341095	6	32615828		A	G	0.5037	0.1479	0.0264	2.081e-08
rs544840894	6	32615833		A	C	0.4908	-0.1472	0.0264	2.426e-08
rs28752516	6	32615834		A	G	0.4516	0.1529	0.0266	8.907e-09
rs28383224	6	32615876		A	G	0.444	0.1631	0.0247	4.052e-11
rs36124427	6	32615900		T	C	0.5138	0.1482	0.0245	1.59e-09
rs34136174	6	32615905		A	C	0.5035	0.1495	0.0264	1.464e-08
rs542851571	6	32616054		C	G	0.1192	0.4469	0.0535	6.258e-17
rs577142567	6	32616108		G	GATGT	0.4443	0.154	0.0267	7.731e-09
rs35542934	6	32616153		T	C	0.5026	0.1494	0.0263	1.409e-08
rs9271352	6	32616161		T	C	0.8148	-0.2622	0.0335	5.383e-15
rs34985232	6	32616238		A	G	0.5022	0.1487	0.0264	1.659e-08
rs28383230	6	32616311		T	C	0.4431	0.1532	0.0266	8.641e-09
rs28383231	6	32616322		T	C	0.5569	-0.1531	0.0266	8.679e-09
rs28383233	6	32616376		A	G	0.5557	-0.1639	0.0247	3.354e-11
rs28383236	6	32616411		T	G	0.4433	0.1533	0.0266	8.51e-09
rs34077986	6	32616414		T	C	0.4979	0.1479	0.0264	1.991e-08
rs113991537	6	32616415		CAA	C	0.5566	-0.1525	0.0266	1.019e-08
rs34537691	6	32616518		A	G	0.5026	0.1497	0.0263	1.335e-08
rs28383241	6	32616542		A	C	0.5541	-0.1542	0.0267	7.473e-09
rs28383242	6	32616548		A	G	0.4459	0.1542	0.0267	7.468e-09
rs28359884	6	32616553		A	C	0.5028	-0.1736	0.0311	2.438e-08
rs34028938	6	32616569		A	C	0.4854	-0.1498	0.0246	1.096e-09
rs35940802	6	32616578		A	G	0.503	0.1499	0.0264	1.323e-08
rs2647092	6	32616663		T	C	0.2349	0.1926	0.0305	2.85e-10
rs685244	6	32616992		A	G	0.4433	0.1537	0.0266	7.755e-09
rs28752527	6	32617151		T	C	0.5566	-0.1528	0.0266	9.486e-09
rs686250	6	32617278		A	G	0.4099	0.1569	0.027	6.196e-09
rs11751024	6	32618459		A	C	0.357	-0.1418	0.0255	2.667e-08
rs562462	6	32618660		T	C	0.8287	-0.2635	0.0456	7.35e-09
rs557048	6	32619224		T	C	0.21	0.2331	0.0329	1.496e-12
rs607998	6	32619261		A	G	0.1721	0.3001	0.0366	2.211e-16
rs28383314	6	32619436		T	C	0.3611	0.1717	0.0249	5.405e-12
rs9271402	6	32619758		T	C	0.7635	-0.1897	0.0306	5.852e-10
rs9271427	6	32620206		A	G	0.8255	-0.3	0.0365	2.088e-16
rs9271428	6	32620207		T	C	0.1745	0.3	0.0365	2.087e-16
rs9271443	6	32620486		A	C	0.8146	-0.2927	0.0362	6.561e-16
rs76351919	6	32620926		C	G	0.1737	0.3052	0.0365	6.273e-17
rs9271524	6	32622043		A	C	0.8275	-0.261	0.0455	9.802e-09
rs9271528	6	32622146		T	C	0.1803	0.2628	0.034	1.133e-14
rs9271545	6	32622376		T	C	0.1719	0.3004	0.0366	2.059e-16
rs2395224	6	32622705		C	G	0.8258	-0.2982	0.0365	3.008e-16
rs9271573	6	32622724		A	C	0.3863	0.1803	0.0252	7.753e-13
rs3129763	6	32623148		A	G	0.1805	0.2657	0.0337	2.926e-15
rs9271593	6	32623421		T	C	0.6233	-0.1769	0.0272	8.31e-11
rs144158892	6	32623536		A	ATCT	0.4117	0.1686	0.0274	7.591e-10
rs9271599	6	32623538		A	C	0.4023	0.1888	0.03	2.927e-10
rs3135003	6	32623699		T	C	0.1765	0.2679	0.0337	1.919e-15
rs373643278	6	32623754		A	AC	0.8333	-0.3133	0.0367	1.45e-17
rs9271612	6	32623877		A	G	0.8329	-0.3116	0.0367	1.971e-17
rs9271613	6	32623889		T	C	0.1754	0.2255	0.0408	3.198e-08
rs9271619	6	32623996		A	G	0.1671	0.3112	0.0367	2.112e-17
rs9271626	6	32624167		A	C	0.1735	0.268	0.0341	3.488e-15
rs9271627	6	32624172		T	C	0.1701	0.3074	0.0366	4.906e-17
rs9271633	6	32624295		T	G	0.8329	-0.3122	0.0368	2.131e-17
rs9271642	6	32624442		A	G	0.3777	0.1771	0.0273	8.433e-11
rs9271656	6	32624797		A	T	0.1643	0.2983	0.0477	4.009e-10
rs9271659	6	32624816		A	G	0.164	0.2997	0.0479	3.932e-10
rs9271666	6	32624916		T	C	0.8331	-0.3117	0.0367	1.887e-17
rs9271668	6	32624997		T	G	0.1669	0.3098	0.0366	2.536e-17
rs9271671	6	32625017		C	G	0.1789	0.3365	0.0559	1.702e-09
rs9271690	6	32625226		T	C	0.8476	-0.3141	0.0371	2.587e-17
rs4311504	6	32625572		C	G	0.8331	-0.3123	0.0367	1.901e-17
rs74291249	6	32626321		A	G	0.176	0.2644	0.034	7.053e-15
rs76045537	6	32626375		T	C	0.8077	-0.2456	0.0409	1.969e-09
rs114527826	6	32626383		T	G	0.1638	0.2787	0.0459	1.255e-09
rs77114005	6	32626565		T	C	0.7805	-0.211	0.035	1.695e-09
rs9271790	6	32626998		A	G	0.1731	0.2727	0.0348	4.803e-15
rs9271792	6	32627066		T	C	0.1691	0.2856	0.0475	1.873e-09
rs9271860	6	32627501		T	C	0.1376	0.4513	0.0778	6.71e-09
rs9271895	6	32628129		T	C	0.8257	-0.2654	0.034	6.17e-15
rs9271903	6	32628261		C	G	0.8382	-0.2751	0.046	2.191e-09
rs9271904	6	32628263		A	G	0.8382	-0.2751	0.046	2.193e-09
rs74389316	6	32629092		T	C	0.2232	0.2094	0.0342	9.384e-10
rs6929044	6	32629174		T	C	0.8322	-0.3106	0.0368	3.131e-17
rs6929398	6	32629189		A	G	0.8247	-0.2641	0.0341	9.443e-15
rs6929057	6	32629228		A	C	0.7197	0.1666	0.0293	1.306e-08
rs74927567	6	32629287		A	G	0.6131	-0.1795	0.0253	1.328e-12
rs9271958	6	32629595		A	G	0.1637	0.2793	0.0461	1.399e-09
rs9272014	6	32630485		A	G	0.2253	0.2436	0.0326	7.753e-14
rs11970000	6	32630514		A	G	0.7249	0.1647	0.0295	2.286e-08
rs7770905	6	32630701		T	C	0.83	-0.2671	0.0466	9.983e-09
rs7758465	6	32631254		A	T	0.1676	0.2675	0.0345	8.567e-15
rs7758472	6	32631262		A	G	0.1727	0.2955	0.0364	4.726e-16
rs9272052	6	32631378		A	G	0.833	-0.3137	0.0368	1.481e-17
rs9272058	6	32631420		T	C	0.8423	-0.2768	0.0361	1.652e-14
rs9272060	6	32631460		A	G	0.1702	0.2651	0.0344	1.282e-14
rs35779452	6	32631495		A	G	0.7262	0.1571	0.0275	1.101e-08
rs9272063	6	32631526		T	C	0.1833	0.2598	0.0343	3.815e-14
rs34061722	6	32631560		T	C	0.2739	-0.158	0.0275	9.096e-09
rs9272065	6	32631575		T	G	0.8272	-0.2964	0.0363	3.256e-16
rs9272066	6	32631597		A	C	0.1794	0.254	0.0338	5.333e-14
rs9272089	6	32631940		A	G	0.8482	-0.2422	0.0442	4.2e-08
rs9272101	6	32632047		T	C	0.1693	0.2673	0.0463	7.947e-09
rs138839740	6	32632060		CTCA	C	0.8306	-0.2672	0.0452	3.311e-09
rs35242582	6	32632280		A	G	0.738	0.1551	0.0283	4.417e-08
rs34180045	6	32632289		T	G	0.7291	0.1654	0.03	3.489e-08
rs34107231	6	32632297		A	G	0.7294	0.1658	0.03	3.349e-08
rs35635298	6	32632302		T	C	0.7295	0.1659	0.03	3.321e-08
rs35744886	6	32632307		A	T	0.7294	0.1654	0.03	3.616e-08
rs35828545	6	32632322		T	C	0.7286	0.1647	0.0299	3.73e-08
rs35426875	6	32632358		T	C	0.724	0.1631	0.0294	2.924e-08
rs34927613	6	32632434		A	G	0.2746	-0.1657	0.0296	2.067e-08
rs13211123	6	32632472		A	C	0.7255	0.1682	0.0295	1.231e-08
rs9272123	6	32632796		T	C	0.1726	0.2996	0.0365	2.136e-16
rs79617990	6	32632917		A	G	0.3209	0.216	0.0309	2.949e-12
rs78776954	6	32633040		T	G	0.8174	-0.2584	0.0337	1.768e-14
rs78240203	6	32633104		A	G	0.8169	-0.2575	0.0336	1.71e-14
rs9272173	6	32633491		T	C	0.806	-0.2517	0.0443	1.358e-08
rs9272176	6	32633556		T	C	0.194	0.2501	0.0442	1.526e-08
rs9272177	6	32633584		T	C	0.806	-0.251	0.0442	1.325e-08
rs9272178	6	32633650		C	G	0.806	-0.251	0.0441	1.295e-08
rs9272181	6	32633786		A	G	0.1864	0.2588	0.0445	6.232e-09
rs9272184	6	32633840		T	C	0.8134	-0.2621	0.045	5.536e-09
rs9272188	6	32633911		C	G	0.8246	-0.2964	0.0363	3.06e-16
rs2395521	6	32633923		T	C	0.191	0.3097	0.0552	2.016e-08
rs9281986	6	32633960		A	AG	0.8526	-0.3305	0.0411	8.87e-16
rs9272191	6	32633992		T	G	0.1746	0.2703	0.0456	3.078e-09
rs9272192	6	32633998		A	G	0.812	-0.2257	0.0411	3.931e-08
rs9272197	6	32634063		T	C	0.1787	0.2696	0.0457	3.72e-09
rs9272198	6	32634065		A	T	0.8213	-0.2696	0.0457	3.721e-09
rs9272199	6	32634075		A	G	0.8212	-0.2688	0.0456	3.884e-09
rs9272200	6	32634091		T	C	0.8017	-0.2516	0.0436	7.666e-09
rs9272203	6	32634109		A	G	0.7986	-0.2529	0.0432	4.999e-09
rs9272208	6	32634190		A	G	0.7998	-0.2492	0.0424	4.172e-09
rs9272213	6	32634262		A	T	0.1761	0.2674	0.0463	7.862e-09
rs531663483	6	32634281		CCTTG	C	0.8257	-0.252	0.0461	4.518e-08
rs9272216	6	32634354		A	G	0.7985	-0.2385	0.0406	4.157e-09
rs17211454	6	32634402		A	G	0.2747	-0.1683	0.0295	1.113e-08
rs17205114	6	32634419		T	G	0.7253	0.1682	0.0295	1.137e-08
rs17205128	6	32634440		C	G	0.7259	0.1685	0.0295	1.147e-08
rs17205135	6	32634445		A	G	0.7258	0.1682	0.0295	1.221e-08
rs9272219	6	32634492		T	G	0.2344	0.2154	0.0302	1.056e-12
rs9272220	6	32634529		A	G	0.1744	0.2991	0.0363	1.691e-16
rs9272222	6	32634559		A	G	0.2249	0.246	0.0326	4.667e-14
rs9272224	6	32634575		T	C	0.2251	0.2457	0.0326	4.842e-14
rs9272225	6	32634595		T	G	0.2332	0.2186	0.0304	6.166e-13
rs17211510	6	32634653		A	C	0.2732	-0.1616	0.0275	4.248e-09
rs17205177	6	32634741		A	G	0.7278	0.1625	0.0276	3.891e-09
rs9272230	6	32634825		A	C	0.1842	0.2572	0.0335	1.578e-14
rs17211545	6	32634831		T	C	0.7241	0.1669	0.0294	1.32e-08
rs9272233	6	32634909		A	G	0.1743	0.2982	0.0362	1.796e-16
rs9272234	6	32634914		A	G	0.1743	0.2983	0.0362	1.794e-16
rs2040410	6	32634921		T	C	0.109	0.3752	0.0483	8.194e-15
rs9272236	6	32634925		T	C	0.7736	-0.2454	0.0325	4.377e-14
rs17211580	6	32634977		A	G	0.2741	-0.1616	0.0275	4.479e-09
rs2040409	6	32634983		A	C	0.8909	-0.3751	0.0483	8.475e-15
rs9272238	6	32635000		T	C	0.1743	0.2979	0.0363	2.485e-16
rs9272240	6	32635002		A	G	0.1743	0.2979	0.0363	2.483e-16
rs9272241	6	32635010		A	G	0.1743	0.2983	0.0363	2.071e-16
rs17211601	6	32635040		T	G	0.7237	0.1669	0.0294	1.345e-08
rs33939413	6	32635050		G	GCAGCCCCT	0.1744	0.2992	0.0363	1.602e-16
rs9272243	6	32635080		A	G	0.8256	-0.2988	0.0363	1.748e-16
rs9272244	6	32635083		T	G	0.1744	0.2988	0.0363	1.748e-16
rs28533091	6	32635087		A	T	0.2759	-0.1671	0.0294	1.264e-08
rs9272246	6	32635126		C	G	0.1765	0.2954	0.0362	3.456e-16
rs9272247	6	32635147		A	G	0.1768	0.3035	0.0364	7.65e-17
rs9272248	6	32635164		A	G	0.1768	0.3036	0.0364	7.56e-17
rs9272249	6	32635175		A	T	0.2236	0.2501	0.0327	2.203e-14
rs9272250	6	32635181		A	T	0.7764	-0.2441	0.0326	7.263e-14
rs9272251	6	32635189		A	G	0.7764	-0.2441	0.0326	7.196e-14
rs2040406	6	32635230		A	G	0.8186	-0.2366	0.0346	7.837e-12
rs9272253	6	32635251		T	G	0.1767	0.2938	0.0362	4.412e-16
rs28694749	6	32635252		T	C	0.7241	0.167	0.0294	1.287e-08
rs9272255	6	32635356		T	C	0.2323	0.2202	0.0304	4.055e-13
rs9272256	6	32635392		T	C	0.8255	-0.2992	0.0363	1.641e-16
rs9272257	6	32635412		T	C	0.1956	0.2442	0.0414	3.517e-09
rs9272258	6	32635414		T	G	0.2247	0.2476	0.033	5.726e-14
rs9272259	6	32635415		A	G	0.7751	-0.2474	0.0329	5.698e-14
rs9272260	6	32635459		A	T	0.1745	0.301	0.0364	1.344e-16
rs9272261	6	32635465		A	G	0.2313	0.2171	0.0305	1.109e-12
rs9272262	6	32635514		A	T	0.8254	-0.2949	0.0363	4.373e-16
rs9272263	6	32635518		A	G	0.2171	0.265	0.0381	3.379e-12
rs9272264	6	32635532		A	G	0.8254	-0.2949	0.0363	4.384e-16
rs28407322	6	32635578		T	C	0.727	0.1612	0.0275	4.842e-09
rs150097334	6	32635637		T	TG	0.1742	0.2992	0.0362	1.488e-16
rs115787103	6	32635640		A	T	0.1742	0.2992	0.0362	1.488e-16
-	6	32635676		T	C	0.8609	-0.2957	0.0462	1.6e-10
-	6	32635677		A	G	0.1391	0.2957	0.0462	1.597e-10
rs115852844	6	32635679		A	G	0.1745	0.3001	0.0364	1.632e-16
rs28675927	6	32635711		A	G	0.7257	0.1609	0.0276	5.273e-09
rs9272271	6	32635749		A	T	0.7701	-0.228	0.031	1.86e-13
rs9272272	6	32635753		A	G	0.2258	0.2496	0.0331	5.03e-14
-	6	32635762		CAATCCACTGTGCTCACAG	C	0.1785	0.3506	0.061	8.924e-09
rs9272273	6	32635806		A	G	0.779	-0.2363	0.0318	1.127e-13
rs9272274	6	32635822		T	C	0.2257	0.2476	0.0331	8.07e-14
rs9272275	6	32635826		T	C	0.1734	0.2654	0.035	3.303e-14
rs9272276	6	32635857		C	G	0.2222	0.234	0.0316	1.307e-13
rs9272277	6	32635864		C	G	0.2269	0.2513	0.033	2.776e-14
rs9272278	6	32635879		C	G	0.801	-0.2858	0.0337	2.02e-17
rs9272279	6	32635881		T	C	0.8242	-0.3112	0.037	3.741e-17
rs9272283	6	32635894		A	T	0.1744	0.2881	0.0465	5.856e-10
rs9272284	6	32635899		A	G	0.8012	-0.2535	0.0416	1.123e-09
rs72232222	6	32635976		CAT	C	0.8304	-0.284	0.0477	2.6e-09
rs9272294	6	32635983		T	C	0.18	0.2635	0.0347	3.32e-14
-	6	32636033		A	T	0.8603	-0.3128	0.0485	1.155e-10
rs9272297	6	32636034		C	G	0.2231	0.2524	0.0336	5.815e-14
rs9272298	6	32636035		T	C	0.2231	0.2524	0.0336	5.814e-14
-	6	32636060		T	C	0.1591	0.2972	0.0379	4.238e-15
-	6	32636070		A	G	0.8603	-0.3142	0.0485	9.554e-11
rs9272302	6	32636077		T	C	0.2345	0.3084	0.0407	3.659e-14
-	6	32636088		A	AC	0.1397	0.3023	0.0485	4.39e-10
-	6	32636101		T	C	0.1397	0.3003	0.0485	5.739e-10
rs9272306	6	32636103		T	C	0.2138	0.2338	0.0391	2.228e-09
rs9272307	6	32636109		T	G	0.2236	0.2509	0.0338	1.064e-13
-	6	32636129		T	C	0.833	-0.2767	0.0368	5.594e-14
rs9272309	6	32636159		A	G	0.7293	-0.2035	0.0312	6.916e-11
rs9272310	6	32636162		T	G	0.3049	0.2319	0.0313	1.23e-13
rs9272311	6	32636176		A	G	0.1775	0.2597	0.0341	2.805e-14
rs9272314	6	32636260		C	G	0.8072	-0.2483	0.0419	3.065e-09
rs9272315	6	32636262		T	C	0.8072	-0.2483	0.0419	3.062e-09
rs9272321	6	32636350		T	C	0.1743	0.3039	0.0371	2.774e-16
rs9272322	6	32636351		T	G	0.8257	-0.3039	0.0371	2.77e-16
rs9272325	6	32636379		A	G	0.2238	0.2504	0.0334	6.783e-14
rs9272326	6	32636392		T	C	0.1678	0.2529	0.0356	1.231e-12
rs9272329	6	32636427		A	G	0.8101	-0.2589	0.0428	1.407e-09
rs6910310	6	32636444		A	G	0.891	-0.3965	0.0501	2.572e-15
rs9272341	6	32636515		A	C	0.1892	0.2682	0.043	4.547e-10
rs9272342	6	32636517		A	G	0.1892	0.2682	0.043	4.551e-10
rs9272343	6	32636549		A	G	0.8265	-0.2837	0.0467	1.216e-09
rs9272348	6	32636619		T	C	0.1913	0.2554	0.0425	1.803e-09
rs9272351	6	32636646		A	G	0.177	0.2698	0.0455	3.066e-09
rs9272352	6	32636677		C	G	0.7662	-0.2544	0.0331	1.534e-14
rs9272354	6	32636708		A	G	0.7897	-0.2563	0.0419	9.21e-10
-	6	32636739		T	C	0.1404	0.3158	0.0475	3.067e-11
rs9272359	6	32636767		T	C	0.3036	0.219	0.0399	4.09e-08
rs66923009	6	32636820		G	GC	0.1718	0.2698	0.0451	2.203e-09
rs9272369	6	32636866		T	C	0.1805	0.2853	0.0474	1.734e-09
rs9272371	6	32636877		T	C	0.7106	-0.2235	0.0405	3.391e-08
rs9272405	6	32637142		T	C	0.8244	-0.2739	0.0492	2.525e-08
rs9272406	6	32637152		C	G	0.1907	0.243	0.0438	2.932e-08
rs9272414	6	32637217		A	T	0.8073	-0.2174	0.0391	2.64e-08
rs9272418	6	32637314		A	G	0.805	-0.2519	0.0412	1.02e-09
rs9272419	6	32637320		T	C	0.1966	0.2494	0.041	1.21e-09
rs9272421	6	32637341		A	G	0.1966	0.2493	0.041	1.214e-09
rs9272423	6	32637387		T	G	0.8269	-0.2731	0.0453	1.635e-09
rs3207966	6	32637420		A	G	0.1734	0.2744	0.0456	1.802e-09
rs1047985	6	32637439		A	G	0.173	0.2728	0.0454	1.889e-09
rs1047993	6	32637494		T	C	0.1958	0.2413	0.0407	2.96e-09
rs9272434	6	32637548		T	C	0.1728	0.2723	0.0453	1.835e-09
rs9272436	6	32637576		A	G	0.8073	-0.2427	0.0418	6.612e-09
rs9272437	6	32637579		A	G	0.803	-0.2441	0.0411	2.75e-09
rs9272438	6	32637581		C	G	0.803	-0.2441	0.0411	2.728e-09
rs116544033	6	32637584		T	G	0.803	-0.2441	0.041	2.731e-09
rs9272445	6	32637643		T	C	0.0969	0.3644	0.0632	7.965e-09
rs9272448	6	32637662		A	T	0.8051	-0.2086	0.038	3.977e-08
rs9272449	6	32637674		A	G	0.8089	-0.243	0.0412	3.83e-09
rs9272450	6	32637701		T	C	0.2077	0.2096	0.0374	2.097e-08
rs548529094	6	32637733		T	TG	0.8042	-0.2414	0.0407	2.929e-09
rs9272455	6	32637766		A	G	0.8028	-0.2461	0.041	1.973e-09
rs7771972	6	32637780		T	C	0.1728	0.2739	0.0454	1.659e-09
rs9272459	6	32637801		A	G	0.2869	0.2156	0.0381	1.526e-08
rs9272460	6	32637806		A	G	0.4932	0.1831	0.0321	1.103e-08
rs9272464	6	32637871		A	G	0.8027	-0.2467	0.041	1.825e-09
rs9272465	6	32637878		A	G	0.1973	0.2467	0.041	1.824e-09
rs9272475	6	32637979		A	G	0.8074	-0.2514	0.043	4.972e-09
rs9272477	6	32637984		A	T	0.193	0.251	0.0429	5.036e-09
rs9272480	6	32638023		A	G	0.8273	-0.2762	0.0457	1.562e-09
rs9272487	6	32638225		T	C	0.1983	0.2325	0.0385	1.584e-09
rs9272489	6	32638253		A	T	0.8268	-0.2894	0.0467	6.019e-10
rs9272493	6	32638299		A	C	0.8054	-0.2714	0.0426	1.821e-10
rs9272495	6	32638356		A	C	0.1736	0.2748	0.0454	1.442e-09
rs9272496	6	32638367		A	G	0.8027	-0.2527	0.0413	9.001e-10
rs9272499	6	32638452		A	C	0.8062	-0.2611	0.0422	6.109e-10
rs9272500	6	32638461		T	C	0.8062	-0.2608	0.0422	6.504e-10
rs9272501	6	32638462		A	G	0.1938	0.2608	0.0422	6.504e-10
rs67321228	6	32638466		G	GC	0.1718	0.2704	0.0452	2.135e-09
rs9272530	6	32638850		T	C	0.1828	0.2827	0.0471	1.881e-09
rs9272550	6	32639193		A	G	0.16	0.28	0.0444	2.791e-10
rs9272551	6	32639199		A	G	0.1942	0.2569	0.0435	3.446e-09
rs9272557	6	32639271		T	C	0.8149	-0.2323	0.0408	1.269e-08
rs9272558	6	32639314		A	G	0.6642	-0.2193	0.0388	1.527e-08
rs9272564	6	32639383		A	C	0.1976	0.2755	0.0441	4.294e-10
rs9272575	6	32639519		A	C	0.1991	0.2509	0.0431	5.79e-09
rs543204882	6	32639530		CAT	C	0.8004	-0.2561	0.0429	2.407e-09
rs9272577	6	32639548		A	G	0.2155	0.2078	0.0376	3.192e-08
rs9272580	6	32639626		A	G	0.8255	-0.2807	0.0458	8.596e-10
rs9272582	6	32639662		C	G	0.1744	0.2778	0.0458	1.284e-09
rs9272591	6	32639766		A	C	0.7984	-0.2643	0.0427	5.957e-10
rs9272603	6	32639897		A	G	0.2017	0.2642	0.0428	6.54e-10
rs9272604	6	32639945		A	G	0.2013	0.2257	0.0391	8.035e-09
rs9272605	6	32639951		A	G	0.8346	-0.2811	0.0446	2.925e-10
rs9272610	6	32639990		T	C	0.8225	-0.2775	0.0451	7.512e-10
rs9272612	6	32640044		A	G	0.2183	0.2418	0.0408	2.966e-09
rs9272615	6	32640105		A	G	0.2092	0.2173	0.0374	6.503e-09
rs9272616	6	32640113		C	G	0.7999	-0.2636	0.0439	1.86e-09
rs9272621	6	32640200		T	G	0.8027	-0.2571	0.0421	1.025e-09
rs9272624	6	32640217		A	G	0.8202	-0.2245	0.0401	2.152e-08
rs9272630	6	32640373		A	G	0.2086	0.2135	0.0375	1.209e-08
rs9272631	6	32640375		T	C	0.798	-0.2591	0.0413	3.69e-10
rs9279904	6	32640391		CAT	C	0.7987	-0.2649	0.0418	2.343e-10
rs9272632	6	32640403		A	G	0.8165	-0.2935	0.0456	1.181e-10
rs9272638	6	32640437		T	C	0.8203	-0.2784	0.0453	8.029e-10
rs9272641	6	32640517		A	G	0.2023	0.2618	0.0423	5.896e-10
rs140779686	6	32640580		G	GA	0.8014	-0.2431	0.0408	2.499e-09
rs9272646	6	32640617		T	C	0.7978	-0.2464	0.0408	1.488e-09
rs67106675	6	32640682		T	TA	0.2194	0.2349	0.0405	6.791e-09
rs9272648	6	32640747		T	C	0.8104	-0.2248	0.0406	3.06e-08
rs9272649	6	32640773		A	C	0.7806	-0.23	0.041	2.008e-08
rs9272669	6	32641039		A	G	0.7951	-0.2499	0.0447	2.281e-08
rs9272672	6	32641072		T	C	0.5788	-0.1631	0.0294	3.04e-08
rs9272685	6	32641214		A	G	0.7991	-0.2474	0.0406	1.108e-09
rs9272686	6	32641238		T	C	0.1734	0.2765	0.0452	9.121e-10
rs9272687	6	32641280		A	G	0.2009	0.2478	0.0406	1.058e-09
rs3207984	6	32641437		T	G	0.201	0.2462	0.0406	1.367e-09
rs546754435	6	32641446		T	G	0.1996	0.2473	0.0408	1.398e-09
rs568465013	6	32641452		A	C	0.2044	0.2417	0.0407	2.996e-09
rs1048052	6	32641453		A	C	0.7956	-0.2417	0.0407	2.995e-09
rs534654325	6	32641461		A	AGGT	0.2925	0.2152	0.0383	1.886e-08
rs3188501	6	32641500		C	G	0.1721	0.286	0.0459	4.456e-10
rs9272713	6	32641568		A	C	0.1728	0.2915	0.0465	3.722e-10
rs9272714	6	32641571		A	C	0.1981	0.2739	0.0422	8.621e-11
rs9272715	6	32641580		T	C	0.802	-0.2729	0.0422	1.011e-10
rs17843560	6	32641611		T	G	0.1192	0.5254	0.0954	3.601e-08
rs9272721	6	32641624		A	C	0.1738	0.2866	0.0459	4.253e-10
rs9272724	6	32641729		C	G	0.2001	0.2489	0.0408	1.103e-09
rs9272728	6	32641816		A	G	0.827	-0.2769	0.0452	9.142e-10
rs9272741	6	32641925		T	G	0.1904	0.2811	0.0449	3.743e-10
rs9272743	6	32641949		T	C	0.1973	0.2548	0.0414	7.404e-10
rs707952	6	32642029		T	C	0.1888	0.2207	0.0403	4.377e-08
rs707949	6	32642175		T	C	0.8269	-0.2777	0.0458	1.332e-09
rs707963	6	32642192		T	G	0.8269	-0.2796	0.0458	1.067e-09
rs707962	6	32642197		T	G	0.8269	-0.2796	0.0458	1.066e-09
rs9272755	6	32642267		T	C	0.8	-0.2466	0.0406	1.272e-09
rs111625346	6	32642273		T	C	0.8	-0.2466	0.0406	1.277e-09
rs9272779	6	32642537		T	C	0.7099	-0.2166	0.038	1.173e-08
rs9272781	6	32642580		A	T	0.7999	-0.2462	0.0406	1.334e-09
rs9272782	6	32642594		A	G	0.7935	-0.21	0.037	1.42e-08
rs9272783	6	32642601		T	C	0.2037	0.211	0.0372	1.365e-08
rs9272784	6	32642602		A	T	0.2043	0.211	0.0372	1.35e-08
rs9272802	6	32642812		T	G	0.2	0.2484	0.0408	1.099e-09
rs9272840	6	32642906		T	C	0.1894	0.2113	0.0386	4.353e-08
rs547306579	6	32643004		T	C	0.2142	0.216	0.0388	2.649e-08
rs1130126	6	32643018		C	G	0.2101	0.2506	0.0413	1.304e-09
rs1130139	6	32643064		T	C	0.7882	-0.2644	0.0419	2.742e-10
rs1130142	6	32643069		C	G	0.7882	-0.2645	0.0419	2.705e-10
rs1130144	6	32643080		A	G	0.2122	0.2635	0.0419	3.178e-10
rs1130145	6	32643081		T	C	0.2122	0.2634	0.0419	3.178e-10
rs1130148	6	32643091		T	C	0.2122	0.2635	0.042	3.366e-10
rs1142414	6	32643092		C	G	0.7878	-0.2635	0.042	3.366e-10
rs1142422	6	32643120		A	C	0.2129	0.2584	0.0418	6.203e-10
rs540435913	6	32643323		A	G	0.1165	0.6129	0.1009	1.245e-09
rs707945	6	32643324		T	G	0.8835	-0.6129	0.1009	1.245e-09
-	6	32643358		A	C	0.1736	0.2644	0.0458	7.518e-09
rs1064991	6	32643399		C	G	0.2015	0.2609	0.0424	7.976e-10
-	6	32643419		A	ATGT	0.1048	0.4515	0.0729	5.944e-10
rs1065045	6	32643478		T	C	0.2338	0.2318	0.0419	3.171e-08
rs1065049	6	32643498		A	C	0.2343	0.235	0.042	2.176e-08
rs9272972	6	32643532		T	C	0.2477	0.2392	0.0338	1.54e-12
rs9272985	6	32643624		A	G	0.7825	-0.2466	0.044	2.073e-08
rs9272986	6	32643625		A	G	0.7825	-0.2466	0.044	2.075e-08
rs76804881	6	32643750		A	T	0.762	-0.2348	0.0334	1.94e-12
rs77484723	6	32643754		T	C	0.7619	-0.2355	0.0333	1.604e-12
rs9273011	6	32643834		T	C	0.773	-0.2463	0.0329	6.596e-14
rs9273012	6	32643864		A	G	0.7754	-0.2198	0.0308	9.301e-13
-	6	32643885		T	C	0.2085	0.2482	0.0341	3.384e-13
-	6	32643886		A	G	0.7965	-0.2343	0.0345	1.174e-11
rs9282045	6	32643906		T	TA	0.8083	-0.2443	0.0429	1.274e-08
rs9273019	6	32643936		C	G	0.1917	0.2495	0.0431	6.949e-09
-	6	32644037		G	GCCGATAAAAAAACAATA	0.7897	-0.245	0.0417	4.262e-09
rs368229589	6	32644073		A	AC	0.2123	0.2577	0.0416	5.938e-10
rs9273035	6	32644109		A	G	0.241	0.2423	0.0334	4.098e-13
rs9273037	6	32644135		A	G	0.2412	0.2428	0.0333	3.175e-13
rs9273039	6	32644174		T	C	0.2411	0.2361	0.0332	1.159e-12
rs9273041	6	32644186		A	T	0.2413	0.2358	0.0332	1.262e-12
rs9273047	6	32644229		T	C	0.2404	0.2391	0.0337	1.336e-12
rs9273054	6	32644302		T	C	0.7405	-0.231	0.0331	2.817e-12
rs9273055	6	32644311		T	G	0.2595	0.2309	0.0331	2.867e-12
rs9273060	6	32644337		A	G	0.6197	-0.2104	0.035	1.861e-09
rs9273064	6	32644425		A	G	0.7471	-0.2522	0.0333	3.391e-14
rs9273068	6	32644437		A	T	0.2451	0.1962	0.0319	8.149e-10
rs9273072	6	32644488		A	C	0.2549	0.2524	0.0333	3.345e-14
rs9273077	6	32644530		A	G	0.589	-0.1697	0.0275	6.674e-10
rs9273080	6	32644556		T	C	0.245	0.2561	0.0336	2.608e-14
rs68165078	6	32644727		T	TC	0.1891	0.2427	0.0421	8.429e-09
rs9273097	6	32644771		A	G	0.7518	-0.2448	0.0417	4.51e-09
rs9273116	6	32644909		A	G	0.2367	0.2479	0.0436	1.327e-08
rs9273120	6	32644924		T	G	0.2501	0.2659	0.0426	4.31e-10
rs9273126	6	32644984		T	C	0.237	0.2409	0.042	9.601e-09
rs9273145	6	32645175		A	T	0.2382	0.253	0.0332	2.57e-14
rs9273150	6	32645233		T	C	0.7755	-0.2338	0.0324	5.222e-13
rs9273151	6	32645234		A	G	0.2333	0.2425	0.0322	4.849e-14
rs9273152	6	32645248		A	C	0.749	-0.2594	0.0336	1.275e-14
rs6932167	6	32645249		A	G	0.0975	0.3972	0.0524	3.287e-14
rs9273161	6	32645329		T	G	0.2364	0.2593	0.0432	1.943e-09
rs9273173	6	32645454		A	G	0.4561	0.1719	0.0299	8.645e-09
rs9273175	6	32645496		A	G	0.2085	0.2237	0.0388	8.226e-09
rs9273183	6	32645541		T	C	0.7815	-0.2562	0.0429	2.433e-09
rs9273186	6	32645595		A	T	0.7855	-0.2755	0.045	9.389e-10
rs9273238	6	32646220		A	G	0.7936	-0.2387	0.0426	2.071e-08
-	6	32647349		A	G	0.6729	-0.3708	0.0651	1.237e-08
rs17612661	6	32648037		A	ACG	0.5238	0.286	0.0506	1.547e-08
rs2646993	6	32652712		T	G	0.2291	0.2423	0.0436	2.654e-08
-	6	32652913		A	G	0.1042	0.4489	0.0728	6.876e-10
-	6	32655325		C	G	0.5243	0.2852	0.0505	1.674e-08
rs3021302	6	32655373		T	C	0.8414	-0.2546	0.0391	7.2e-11
rs9273324	6	32655379		T	C	0.4259	0.2189	0.0388	1.642e-08
rs2395228	6	32655446		A	C	0.8668	-0.4401	0.0715	7.391e-10
rs549470361	6	32655564		CT	C	0.5242	0.2827	0.0506	2.239e-08
rs9273340	6	32655657		T	C	0.7268	-0.1975	0.0328	1.756e-09
rs9273358	6	32658242		T	C	0.3255	0.167	0.0303	3.71e-08
rs28414666	6	32658674		A	G	0.2248	-0.196	0.0307	1.634e-10
rs9273369	6	32658707		T	C	0.8798	-0.4405	0.0528	7.574e-17
rs28672722	6	32658760		T	G	0.3019	-0.1476	0.027	4.482e-08
rs28718232	6	32658973		A	G	0.7751	0.1962	0.0307	1.576e-10
rs9273399	6	32659340		A	C	0.5543	0.2403	0.0357	1.784e-11
rs9273438	6	32659746		A	G	0.4745	-0.2499	0.0354	1.657e-12
rs2854275	6	32660651		A	C	0.133	0.3977	0.0676	3.938e-09
rs9273873	6	32661873		T	C	0.802	-0.2556	0.0393	8.179e-11
-	6	32663145		A	T	0.1452	0.3733	0.0655	1.229e-08
-	6	32663151		A	C	0.1452	0.3731	0.0655	1.256e-08
rs281863466	6	32663219		T	C	0.215	0.2669	0.0436	9.062e-10
rs281863431	6	32663261		A	G	0.7857	-0.2707	0.0436	5.318e-10
-	6	32663280		T	C	0.8585	-0.3803	0.0656	6.856e-09
-	6	32663288		T	C	0.1391	0.3661	0.0647	1.518e-08
-	6	32663566		T	C	0.8571	-0.3842	0.0658	5.235e-09
-	6	32663571		A	G	0.1352	0.3601	0.0619	6.055e-09
-	6	32663612		G	GCCTACA	0.8615	-0.3796	0.0671	1.547e-08
rs281874828	6	32663641		A	G	0.8333	-0.3066	0.0446	6.154e-12
rs281874821	6	32663649		A	G	0.1691	0.2839	0.0441	1.186e-10
rs9274497	6	32666151		A	G	0.1994	0.3107	0.0436	1.064e-12
rs9274504	6	32666334		T	C	0.2808	0.192	0.0322	2.462e-09
rs9274505	6	32666349		A	G	0.1721	0.2728	0.0428	1.848e-10
rs9274514	6	32666466		A	G	0.2025	0.2509	0.0389	1.103e-10
rs3891176	6	32666541		A	C	0.1837	0.2682	0.0405	3.612e-11
rs9274522	6	32666596		T	C	0.2862	0.1796	0.0317	1.519e-08
-	6	32666625		A	AAGC	0.1419	0.3793	0.0655	7.171e-09
rs3891175	6	32666690		T	C	0.1963	0.269	0.0394	8.338e-12
-	6	32666807		C	G	0.8508	-0.4018	0.0469	1.075e-17
-	6	32666836		T	C	0.1334	0.3743	0.0625	2.098e-09
rs4988889	6	32667175		T	G	0.2007	0.2608	0.039	2.255e-11
rs9274563	6	32667234		A	G	0.2881	0.1919	0.032	1.893e-09
-	6	32667293		A	T	0.4826	0.3092	0.0499	5.832e-10
rs9274567	6	32667304		A	G	0.7139	-0.1856	0.032	6.608e-09
rs9274569	6	32667315		A	C	0.2869	0.1864	0.0319	5.448e-09
rs9274571	6	32667393		T	C	0.2702	0.1718	0.0306	2.027e-08
rs4988888	6	32667420		T	C	0.8012	-0.3118	0.0435	7.658e-13
rs9274574	6	32667442		A	G	0.2859	0.1812	0.0318	1.193e-08
rs9274576	6	32667486		T	C	0.7128	-0.1821	0.0317	9.428e-09
rs9274617	6	32668127		A	T	0.287	0.1808	0.0316	1.057e-08
rs9274620	6	32668188		T	G	0.287	0.1812	0.0316	1.001e-08
rs9274623	6	32668221		T	G	0.1928	0.2768	0.0397	3.286e-12
rs9274624	6	32668244		A	G	0.287	0.1814	0.0316	9.763e-09
rs9274627	6	32668264		T	G	0.2871	0.1814	0.0316	9.763e-09
rs9274634	6	32668346		A	C	0.713	-0.182	0.0316	8.931e-09
rs9274645	6	32668413		A	G	0.2862	0.1858	0.0318	4.906e-09
rs9274648	6	32668438		A	G	0.2865	0.1838	0.032	9.51e-09
rs9274652	6	32668458		T	C	0.2874	0.1838	0.0317	6.892e-09
rs9274653	6	32668477		T	C	0.7127	-0.1836	0.0317	7.235e-09
rs9274662	6	32668717		T	C	0.3365	-0.1647	0.0288	1.138e-08
rs9274671	6	32668825		C	G	0.1207	0.4348	0.0527	1.664e-16
rs2858302	6	32668979		T	C	0.68	-0.1596	0.0277	7.911e-09
rs2395231	6	32669525		A	G	0.1087	0.4865	0.0567	9.904e-18
-	6	32683652		CA	C	0.8991	-0.4427	0.0739	2.076e-09
rs3134978	6	32683700		A	T	0.881	-0.4266	0.0493	5.163e-18
rs3134977	6	32683864		T	G	0.1192	0.4273	0.0493	4.546e-18
rs3134971	6	32686372		A	C	0.8783	-0.4332	0.0527	1.946e-16
rs3129716	6	32689659		T	C	0.881	-0.4257	0.0493	5.791e-18
rs2856674	6	32691868		A	G	0.8805	-0.425	0.0492	5.397e-18
rs1794520	6	32694561		A	T	0.1436	0.4275	0.0753	1.343e-08
rs1794519	6	32694696		A	C	0.8783	-0.4335	0.0527	2.05e-16
rs2647019	6	32695578		C	G	0.119	0.426	0.0493	5.472e-18
rs1794283	6	32698581		T	C	0.119	0.4257	0.0493	5.882e-18
rs1794280	6	32699394		A	T	0.8808	-0.4267	0.0493	4.6e-18
rs17427599	6	32699587		T	C	0.2904	-0.1524	0.027	1.625e-08
rs1794279	6	32699818		T	G	0.1224	0.5162	0.0794	8.142e-11
rs1794277	6	32700886		A	G	0.1187	0.4279	0.0494	4.584e-18
rs1613056	6	32701169		T	C	0.1187	0.4275	0.0493	4.447e-18
rs1794511	6	32703430		T	G	0.8814	-0.4279	0.0494	4.338e-18
rs1794530	6	32704023		T	G	0.881	-0.4285	0.0493	3.768e-18
rs1794274	6	32704266		T	G	0.1401	0.4247	0.0754	1.78e-08
rs1794272	6	32704439		A	T	0.8671	-0.4156	0.0663	3.641e-10
rs1794528	6	32704662		T	C	0.867	-0.4156	0.0663	3.665e-10
rs1617322	6	32706116		A	C	0.1185	0.4279	0.0494	4.532e-18
rs9275576	6	32711549		T	C	0.1179	0.4335	0.0494	1.66e-18
rs3957147	6	32714358		T	C	0.1982	0.2853	0.0409	3.141e-12
rs9276625	6	32775967		A	G	0.1012	0.3943	0.0523	4.563e-14
rs4947258	6	32779725		A	G	0.8977	-0.4025	0.0516	5.962e-15
rs4947349	6	32780013		T	G	0.1023	0.4024	0.0516	6.058e-15
rs9276688	6	32783467		T	C	0.1023	0.4027	0.0516	5.859e-15
rs9276689	6	32784185		T	C	0.1026	0.3959	0.0515	1.475e-14
rs719655	6	32784556		T	C	0.1023	0.4027	0.0516	5.84e-15
rs9276691	6	32785067		A	G	0.8977	-0.4027	0.0516	5.815e-15
rs7762279	6	32787513		T	C	0.8977	-0.4026	0.0516	5.924e-15
rs9276700	6	32788876		T	C	0.1023	0.4027	0.0516	5.769e-15
rs9276710	6	32789325		T	C	0.8142	-0.1799	0.0321	2.085e-08
rs9280183	6	32795145		CTG	C	0.8962	-0.4534	0.0559	4.774e-16
rs9276731	6	32797808		T	G	0.1011	0.3929	0.0522	4.937e-14
rs4947350	6	32799843		T	C	0.8143	-0.1898	0.0325	4.98e-09
rs6912056	6	32806497		A	G	0.1856	0.1896	0.0324	5.084e-09
rs9276772	6	32806514		C	G	0.8977	-0.4023	0.0515	5.609e-15
rs4513843	6	32808813		C	G	0.184	0.1868	0.0325	8.925e-09
rs1054684	6	32809144		T	C	0.899	-0.4625	0.0547	2.717e-17
rs7383287	6	32815309		A	G	0.8247	-0.2057	0.0356	7.724e-09
rs60045856	6	32832068		T	G	0.8954	-0.3641	0.0509	8.272e-13
rs143970236	6	32834935		T	TTTG	0.1057	0.4068	0.0555	2.301e-13
rs114595701	6	32839713		T	C	0.0861	0.4069	0.0564	5.184e-13
rs45506201	6	32840522		A	G	0.0861	0.4056	0.0563	5.981e-13
rs116827595	6	32845991		A	G	0.0862	0.4072	0.0566	6.208e-13
rs115591082	6	32876326		A	G	0.9142	-0.3979	0.0563	1.593e-12
rs72860374	6	32895181		C	G	0.9107	-0.3675	0.0544	1.464e-11
rs56098412	6	32911694		A	G	0.9141	-0.3978	0.0565	1.888e-12
rs77318243	6	32936262		A	T	0.0789	0.3348	0.0573	5.253e-09
rs75301392	6	32936274		T	C	0.0789	0.3345	0.0573	5.412e-09
rs73396800	6	32946949		C	G	0.0764	0.3407	0.0585	5.667e-09
rs73396802	6	32948020		T	C	0.0764	0.3407	0.0585	5.686e-09
rs57651384	6	32956072		A	G	0.0765	0.339	0.0584	6.577e-09
rs116131925	6	32962166		A	T	0.9236	-0.3351	0.0585	9.838e-09
rs58173627	6	32962349		A	G	0.0765	0.339	0.0584	6.563e-09
rs59576053	6	32968343		T	C	0.0764	0.3401	0.0585	5.98e-09
rs73409626	6	32975630		A	T	0.9235	-0.3395	0.0584	6.258e-09
rs73409631	6	32977689		A	G	0.9236	-0.3419	0.0584	4.884e-09
rs73409636	6	32978734		A	G	0.0764	0.3389	0.0585	6.963e-09
rs532089382	6	32978829		CAG	C	0.8965	-0.3597	0.0575	4.004e-10
rs151013983	6	32978847		CT	C	0.9048	-0.3643	0.0606	1.785e-09
rs73409643	6	32981452		T	C	0.0764	0.3392	0.0585	6.786e-09
rs111234931	6	32982862		T	C	0.0764	0.3391	0.0585	6.818e-09
rs113070636	6	32983120		A	C	0.0764	0.3393	0.0585	6.729e-09
rs143522819	6	32983125		T	TAGC	0.0786	0.3878	0.0635	9.974e-10
rs112935194	6	32990120		T	C	0.9235	-0.3372	0.0585	8.265e-09
rs57331574	6	32993414		T	C	0.9235	-0.3391	0.058	4.922e-09
rs113913737	6	32994353		T	C	0.0765	0.3443	0.0586	4.168e-09
rs73409691	6	32996171		T	G	0.0754	0.3413	0.0594	9.44e-09
rs570941254	6	151226899	AKAP12	A	G	0.99	-1.168	0.196	2.52e-09
-	6	151266100	AKAP12	T	G	0.0101	1.2232	0.1937	2.691e-10
-	7	48852494	CDC14C	T	G	0.0121	1.0161	0.1843	3.518e-08
-	7	48856892	CDC14C	A	G	0.0121	1.0161	0.1843	3.518e-08
-	7	48871358	CDC14C	A	T	0.9881	-1.025	0.185	2.999e-08
-	7	48874439	CDC14C	T	C	0.9887	-1.1301	0.1931	4.87e-09
-	7	48876391	CDC14C	C	G	0.9866	-0.9999	0.1833	4.928e-08
rs575869806	7	82901968	PCLO	A	T	0.9536	-1.6909	0.2848	2.908e-09
rs149556312	8	125666025	TRIB1	T	C	0.0261	3.5239	0.6064	6.197e-09
rs2452216	10	2467715	PFKP	T	C	0.0242	0.8228	0.1464	1.912e-08
rs138765886	11	48494767	OR4A47	A	G	0.0197	1.2277	0.2189	2.054e-08
rs139128886	11	48555288	OR4A47	T	C	0.9808	-1.6101	0.2664	1.499e-09
rs11822616	11	74802933	RNF169	C	G	0.0257	3.7332	0.6706	2.591e-08
-	15	52682707	FAM214A	T	TC	0.0199	0.9426	0.1684	2.153e-08
rs139132726	17	57566488	MSI2	T	C	0.0102	5.1467	0.8412	9.466e-10
rs115553053	19	1082845	ARHGAP45	T	C	0.0362	1.6531	0.2858	7.275e-09
-	19	34868591	ZNF30	A	G	0.0118	0.9383	0.1699	3.314e-08
rs561270260	19	34896411	ZNF30	C	G	0.0112	0.9896	0.1714	7.692e-09
rs186728968	19	34972186	ZNF792	A	G	0.0121	0.9488	0.1691	2.007e-08
-	19	35358981	FFAR3	C	G	0.9643	-0.6718	0.1115	1.667e-09
rs148082328	19	35417556	FFAR2	T	G	0.0183	0.67	0.1096	9.82e-10
rs191952100	19	35574451	PMIS2	A	G	0.0173	0.9565	0.142	1.627e-11
rs560825510	19	35632109	RBM42	A	G	0.0165	1.0204	0.1428	8.905e-13
rs540820582	19	35656761	COX6B1	A	G	0.0179	1.0623	0.1353	4.097e-15
rs185168306	19	35717656	KMT2B	A	G	0.0329	0.4738	0.083	1.152e-08
rs576281259	19	35775168	ARHGAP33	T	C	0.0179	1.0605	0.1355	5.07e-15
rs4805141	19	35831567	NPHS1	T	C	0.0201	0.7196	0.1027	2.457e-12
rs62109662	19	35833563	NPHS1	A	G	0.02	0.7252	0.1031	1.98e-12
rs372598043	19	35945880	LRFN3	T	G	0.0181	1.1739	0.1287	7.347e-20
rs4806237	19	35948396	LRFN3	A	G	0.259	0.2039	0.0347	4.107e-09
rs150272170	19	35972253	LRFN3	A	G	0.9771	-1.0794	0.1193	1.493e-19
rs45471297	19	36115262	TBCB	C	G	0.9699	-0.575	0.0943	1.086e-09
rs17885114	19	36145689	CAPNS1	C	G	0.9685	-0.87	0.1098	2.262e-15
rs570089820	19	36443746	ZNF566	T	C	0.0294	0.8645	0.113	1.995e-14
-	19	36468247	ZNF566	A	C	0.9856	-1.3776	0.1335	5.951e-25
rs76231093	19	36679777	ZNF567	C	G	0.0251	2.6284	0.4534	6.761e-09
rs56310944	19	36696981	ZNF567	A	G	0.975	-2.669	0.4573	5.328e-09
rs34676748	19	36779669	ZNF850	A	G	0.0488	0.5542	0.0989	2.079e-08
rs12973920	19	36884943	ZNF345	C	G	0.9533	-0.5454	0.0967	1.7e-08
rs145002878	19	36893133	ZNF345	T	C	0.0338	0.7528	0.1102	8.256e-12
rs150575544	19	37567764	ZNF571	C	G	0.9575	-0.6278	0.1028	1.009e-09
rs186156954	19	37595735	ZNF540	A	G	0.0328	0.7579	0.1112	9.397e-12
rs140943205	19	37638268	ZFP30	T	C	0.033	0.7515	0.1111	1.355e-11
rs150584091	19	38003682	SIPA1L3	A	G	0.0371	0.5169	0.0837	6.567e-10
rs141765490	19	38071355	SIPA1L3	T	C	0.0283	0.8493	0.1155	1.884e-13
rs118040651	19	38157493	SIPA1L3	C	G	0.9645	-0.5129	0.0874	4.434e-09
rs116981346	19	38206937	SIPA1L3	A	G	0.9649	-0.5193	0.087	2.36e-09
rs576820096	19	38625740	EIF3K	T	C	0.024	0.8061	0.128	3.058e-10
rs143802595	19	38991531	FBXO27	T	C	0.9795	-0.773	0.1225	2.757e-10
rs533645723	19	39036433	FBXO27	T	TA	0.0206	0.8515	0.1364	4.312e-10
rs143626739	19	39099540	ACP7	A	G	0.0217	0.8262	0.1339	6.829e-10
rs35106218	19	39155161	PAK4	T	C	0.0222	0.784	0.1331	3.829e-09
rs145044453	19	43385945	TEX101	T	TCCA	0.0745	1.8544	0.3054	1.268e-09
rs200733797	19	43393039	TEX101	CAG	C	0.9247	-1.9487	0.3078	2.446e-10
rs139560968	19	43404402	TEX101	CTATAT	C	0.9256	-1.9559	0.3085	2.31e-10
rs187223381	19	43404413	TEX101	T	C	0.9256	-1.9559	0.3085	2.31e-10
rs200786642	19	43406071	TEX101	CCT	C	0.9259	-1.9647	0.3088	1.99e-10
rs56092144	19	56232671	ZSCAN5A	T	C	0.9466	-0.8187	0.1273	1.271e-10
rs60158386	22	23617401	DRICH1	T	G	0.0287	3.0874	0.518	2.518e-09
rs73885319	22	36265860	APOL1	A	G	0.7836	-0.9298	0.1196	7.378e-15
rs60910145	22	36265988	APOL1	T	G	0.7845	-0.9415	0.1201	4.467e-15
rs58384577	22	36267167	APOL1	T	C	0.7856	-0.9558	0.1225	6.08e-15
rs60295735	22	36271108	APOL1	A	G	0.2261	0.9383	0.124	3.759e-14
rs115103799	22	36279106	APOL1	A	G	0.2214	1.1453	0.196	5.112e-09
rs73405714	22	36279367	APOL1/MYH9	A	G	0.7865	-0.9201	0.1228	6.861e-14
rs58168942	22	36286688	MYH9	A	G	0.1917	0.9808	0.1276	1.538e-14
rs11912763	22	36288676	MYH9	A	G	0.1914	0.9182	0.1262	3.394e-13
rs73405727	22	36294441	MYH9	T	C	0.1919	0.9213	0.1266	3.353e-13
rs56339459	22	36297566	MYH9	T	C	0.1914	0.9045	0.1267	9.473e-13
rs55633261	22	36300669	MYH9	A	G	0.1911	0.9044	0.1272	1.148e-12
rs111957026	22	36307818	MYH9	A	G	0.2332	0.6592	0.1201	4.023e-08

## Sheet: Table S1b
Supplementary Table 1b. Significant (P<5e-8) GWAS results from meta-analysis of European ancestry individuals (GRCh38).
rsID	CHR	BP	Mapped Gene	Effect Allele	Other Allele	EAF	Beta	SE	P
rs531331056	1	183403450	NMNAT2	A	C	0.0107	2.7306	0.3469	3.518e-15
rs191872995	1	185737251	HMCN1	C	G	0.9887	-4.2476	0.7408	9.823e-09
rs148739162	2	3331215	EIPR1	T	C	0.9857	-4.1466	0.7471	2.854e-08
rs62167409	2	132451174	GPR39	T	C	0.5831	-0.4138	0.0748	3.158e-08
rs116501595	2	159990831	PLA2R1	T	C	0.0137	0.8102	0.1437	1.714e-08
rs112182949	2	232851424	GIGYF2	T	C	0.0529	0.8444	0.1522	2.89e-08
rs3131781	6	30969955		A	G	0.8812	-0.3259	0.054	1.584e-09
rs3094084	6	30979732		A	T	0.8416	-0.2558	0.0464	3.533e-08
rs1632863	6	31000992		C	G	0.8806	-0.3054	0.056	4.841e-08
rs1634716	6	31001977		A	G	0.119	0.3193	0.0539	3.217e-09
rs1634721	6	31009903		A	G	0.1191	0.3205	0.0539	2.722e-09
rs1634726	6	31018051		A	G	0.1191	0.3218	0.054	2.454e-09
rs2517546	6	31041278		T	C	0.1382	0.298	0.0501	2.801e-09
rs3130574	6	31048773		A	G	0.8784	-0.3257	0.0536	1.2e-09
rs3131920	6	31051131		T	G	0.8784	-0.3258	0.0536	1.199e-09
rs2844642	6	31052029		A	G	0.1475	0.2661	0.0486	4.23e-08
rs3131788	6	31057019		A	G	0.122	0.3309	0.0534	5.73e-10
rs3131794	6	31067614		T	G	0.1233	0.3199	0.0554	7.867e-09
rs3094671	6	31076686		T	C	0.878	-0.3327	0.0535	4.846e-10
rs3095311	6	31083898		A	G	0.8779	-0.3322	0.0535	5.16e-10
rs3130544	6	31090563		A	C	0.1215	0.3321	0.0536	5.756e-10
rs2535296	6	31092442		A	G	0.8501	-0.2698	0.0483	2.264e-08
rs3094087	6	31093784		T	C	0.8623	-0.3093	0.0505	8.796e-10
rs3130968	6	31097294		T	C	0.1371	0.3055	0.0506	1.602e-09
rs201376697	6	31098850		G	GACA	0.1265	0.3192	0.0552	7.476e-09
rs144846110	6	31098856		A	G	0.8764	-0.3209	0.0552	6.324e-09
rs539354792	6	31104918		T	C	0.8798	-0.3198	0.0559	1.052e-08
rs3132556	6	31111032		A	T	0.8297	-0.2448	0.0445	3.718e-08
rs2233980	6	31111867		A	G	0.122	0.3317	0.0535	5.509e-10
rs2233974	6	31112239		C	G	0.8356	-0.2576	0.0453	1.279e-08
rs3094222	6	31113657		A	G	0.8777	-0.3254	0.0534	1.125e-09
rs3130985	6	31117579		T	C	0.1224	0.3307	0.0533	5.328e-10
rs3130557	6	31126926		T	C	0.1226	0.3252	0.0534	1.157e-09
rs3132541	6	31130957		A	C	0.8773	-0.324	0.0534	1.264e-09
rs3130562	6	31133197		T	C	0.8774	-0.3242	0.0534	1.243e-09
rs7750641	6	31161533		T	C	0.1223	0.3319	0.0535	5.455e-10
rs1619179	6	31208169		A	C	0.8774	-0.3315	0.0534	5.269e-10
rs1639109	6	31226806		A	G	0.1219	0.3302	0.0556	2.844e-09
rs1639108	6	31228777		T	C	0.8772	-0.3322	0.0534	4.956e-10
rs1793894	6	31229085		A	G	0.1316	0.3041	0.0513	3.082e-09
rs2524086	6	31273534		A	G	0.8481	-0.2853	0.0468	1.079e-09
rs2853949	6	31273887		A	G	0.1519	0.2851	0.0468	1.108e-09
rs2524078	6	31274872		A	G	0.8499	-0.2888	0.0472	9.681e-10
rs2844614	6	31275763		A	G	0.1517	0.2871	0.0469	9.095e-10
rs2844613	6	31276069		T	G	0.1505	0.2932	0.047	4.56e-10
rs2524069	6	31277012		A	T	0.8518	-0.3053	0.0473	1.131e-10
rs2853947	6	31278019		T	C	0.1511	0.2911	0.0469	5.426e-10
rs2524067	6	31278044		A	G	0.8489	-0.2911	0.0469	5.433e-10
rs2524065	6	31278547		A	C	0.8489	-0.2914	0.0469	5.144e-10
rs2844609	6	31279613		A	G	0.151	0.2939	0.0469	3.763e-10
rs2853945	6	31279959		T	C	0.8489	-0.2918	0.0469	4.898e-10
rs2853942	6	31280392		T	C	0.1511	0.2916	0.0469	4.979e-10
rs2253491	6	31281440		A	G	0.1859	0.2542	0.0423	1.87e-09
rs7748141	6	31321100		T	C	0.8835	-0.3856	0.0544	1.348e-12
rs9265645	6	31332420		A	G	0.1191	0.3695	0.0539	7.04e-12
rs4947307	6	31334488		A	G	0.8956	-0.4042	0.0579	3.008e-12
rs1634772	6	31336302		A	G	0.8318	-0.2964	0.0481	7.149e-10
rs1631951	6	31337864		T	C	0.1683	0.2844	0.0449	2.347e-10
rs1625792	6	31338643		A	G	0.1191	0.37	0.0537	5.782e-12
rs2854019	6	31340699		A	T	0.1192	0.3643	0.0557	6.22e-11
rs2854018	6	31340785		T	C	0.1146	0.3663	0.0569	1.251e-10
rs402175	6	31340940		A	G	0.119	0.3683	0.0538	7.762e-12
rs1634776	6	31341211		T	C	0.1223	0.3725	0.0535	3.198e-12
rs3132474	6	31342008		A	G	0.1211	0.3624	0.0556	7.201e-11
rs9265831	6	31343672		A	T	0.1208	0.3642	0.0557	6.327e-11
rs2394976	6	31344135		T	G	0.1368	0.3106	0.0504	7.255e-10
rs2256747	6	31344173		T	C	0.881	-0.3686	0.0538	7.281e-12
rs2256750	6	31344243		A	G	0.1191	0.3679	0.0538	7.883e-12
rs2844589	6	31344482		A	G	0.119	0.3685	0.0538	7.353e-12
rs3134792	6	31344549		T	G	0.8809	-0.3681	0.0538	7.626e-12
rs2854010	6	31344715		A	G	0.8812	-0.3713	0.0539	5.784e-12
rs9265857	6	31344830		C	G	0.1189	0.3692	0.0539	7.264e-12
rs2394978	6	31344879		T	C	0.119	0.3687	0.0538	7.258e-12
rs2394979	6	31344952		A	G	0.1193	0.3648	0.0557	5.923e-11
rs2394980	6	31345164		T	C	0.119	0.3691	0.0538	6.873e-12
rs2394981	6	31345252		T	G	0.1194	0.365	0.0557	5.785e-11
rs9265886	6	31345444		A	C	0.8808	-0.3653	0.0557	5.586e-11
rs7450305	6	31345590		T	C	0.8795	-0.3625	0.0557	7.386e-11
rs9265908	6	31345900		T	C	0.119	0.3696	0.0538	6.416e-12
rs9265910	6	31345945		T	C	0.1192	0.3652	0.0557	5.655e-11
rs7749555	6	31346497		A	G	0.884	-0.3692	0.0566	6.879e-11
rs2507998	6	31346875		A	G	0.881	-0.3704	0.0538	5.789e-12
rs9265937	6	31347161		T	C	0.1194	0.3701	0.0538	6.291e-12
rs9265938	6	31347228		T	C	0.1193	0.3722	0.0539	4.893e-12
rs9265939	6	31347250		A	G	0.8807	-0.3719	0.0539	5.048e-12
rs9265942	6	31347281		C	G	0.8902	-0.3707	0.0585	2.358e-10
rs9265946	6	31347361		A	G	0.1174	0.3672	0.0565	8.115e-11
rs9265948	6	31347416		T	C	0.1185	0.3765	0.0543	4.063e-12
rs9265949	6	31347452		T	C	0.1165	0.3939	0.0544	4.377e-13
rs9265964	6	31347841		A	G	0.881	-0.3704	0.0538	5.837e-12
rs9265965	6	31347852		T	C	0.8879	-0.3813	0.0576	3.559e-11
rs9265967	6	31347872		T	G	0.116	0.3649	0.0565	1.059e-10
rs9265968	6	31347886		A	T	0.8868	-0.3702	0.0572	9.405e-11
rs9265969	6	31347929		A	G	0.137	0.3142	0.0502	3.997e-10
rs9265971	6	31348015		T	C	0.8812	-0.3712	0.0539	5.534e-12
rs9265972	6	31348028		C	G	0.1188	0.3709	0.0538	5.611e-12
rs9265973	6	31348084		A	G	0.1188	0.3711	0.0539	5.543e-12
rs9265974	6	31348102		T	G	0.8812	-0.3711	0.0539	5.535e-12
rs9265976	6	31348156		A	G	0.8818	-0.3726	0.0545	8.05e-12
rs9265979	6	31348267		T	C	0.1186	0.3716	0.0541	6.367e-12
rs9265982	6	31348303		T	C	0.1191	0.3675	0.0538	8.436e-12
rs9265985	6	31348457		A	C	0.8811	-0.3688	0.0538	7.295e-12
rs9265990	6	31348671		A	T	0.1179	0.3754	0.0547	7.017e-12
rs9265993	6	31348743		A	G	0.1187	0.3678	0.056	5.115e-11
rs9265994	6	31348749		T	C	0.8886	-0.3984	0.056	1.129e-12
rs9265998	6	31348836		A	G	0.1185	0.3759	0.0543	4.308e-12
rs9266001	6	31348918		A	C	0.1166	0.3895	0.0543	7.531e-13
rs2923008	6	31349134		T	G	0.1166	0.3898	0.0543	7.276e-13
rs3016017	6	31349286		A	G	0.881	-0.3687	0.0538	7.152e-12
rs2923007	6	31349288		T	C	0.881	-0.3687	0.0538	7.162e-12
rs2596510	6	31350531		T	G	0.1193	0.3639	0.0537	1.222e-11
rs2596508	6	31350655		T	C	0.8809	-0.3661	0.0538	9.763e-12
rs2854002	6	31350928		A	G	0.8513	-0.3126	0.0473	3.92e-11
rs2596505	6	31351008		T	C	0.1492	0.3135	0.0472	3.142e-11
rs2596504	6	31351252		T	C	0.1501	0.3059	0.0472	8.786e-11
rs2507995	6	31351438		C	G	0.1489	0.313	0.0473	3.59e-11
rs2442729	6	31351449		T	C	0.1506	0.3101	0.0471	4.545e-11
rs9266066	6	31351748		T	C	0.1489	0.3144	0.0473	3.006e-11
rs9266070	6	31351841		A	T	0.1488	0.3153	0.0473	2.738e-11
rs2442727	6	31351890		A	G	0.1466	0.3187	0.0476	2.062e-11
rs36057735	6	31352146		C	G	0.8173	-0.2611	0.0438	2.476e-09
rs2442722	6	31352464		A	G	0.1741	0.204	0.037	3.593e-08
rs2596500	6	31353490		A	C	0.8831	-0.3907	0.0541	5.252e-13
rs2853999	6	31358297		A	T	0.8837	-0.3951	0.0545	4.113e-13
rs2523593	6	31358926		T	C	0.8833	-0.3934	0.0542	4.051e-13
rs2523584	6	31360113		A	G	0.8835	-0.3937	0.0542	3.951e-13
rs2523573	6	31361211		C	G	0.8833	-0.3933	0.0542	4.01e-13
rs2596544	6	31361514		A	T	0.2163	0.2382	0.0407	4.965e-09
rs2596545	6	31361597		A	C	0.8833	-0.3932	0.0542	4.078e-13
rs2596547	6	31361865		T	C	0.1173	0.3865	0.054	8.278e-13
rs2523571	6	31361914		A	T	0.1173	0.3866	0.054	8.223e-13
rs2523546	6	31365143		A	G	0.1214	0.3759	0.0532	1.612e-12
rs2844577	6	31366645		T	C	0.8786	-0.3761	0.0532	1.578e-12
rs2596430	6	31367654		T	C	0.8786	-0.3761	0.0532	1.575e-12
rs2156874	6	31368199		C	G	0.1167	0.3937	0.0542	3.781e-13
rs2853986	6	31371067		T	C	0.8814	-0.3925	0.0539	3.42e-13
rs2523524	6	31372219		A	G	0.1234	0.3756	0.0529	1.208e-12
rs2844559	6	31372298		T	C	0.1234	0.3749	0.0529	1.314e-12
rs2905719	6	31376613		A	G	0.8787	-0.3762	0.0532	1.572e-12
rs2442735	6	31378876		A	G	0.8786	-0.3762	0.0532	1.561e-12
rs9279179	6	31379072		CG	C	0.8783	-0.3685	0.055	2.178e-11
rs9266639	6	31379292		T	C	0.2873	0.204	0.0363	2.001e-08
rs2596570	6	31380263		T	C	0.8564	-0.3278	0.0486	1.578e-11
rs9266669	6	31380300		A	G	0.145	0.3254	0.0484	1.7e-11
rs4143333	6	31380742		A	G	0.8925	-0.3926	0.0574	7.781e-12
rs2844531	6	31385394		A	G	0.8833	-0.3929	0.0542	4.254e-13
rs2596565	6	31385552		A	G	0.1167	0.393	0.0542	4.158e-13
rs2844530	6	31385658		C	G	0.8834	-0.3921	0.0542	4.856e-13
rs2596560	6	31387541		T	C	0.7623	-0.2387	0.0389	8.367e-10
rs2523466	6	31395249		T	G	0.23	0.2252	0.0394	1.104e-08
rs2523495	6	31410201		T	C	0.1162	0.3965	0.0544	2.983e-13
rs3132472	6	31418354		A	G	0.1164	0.3952	0.0543	3.319e-13
rs3132473	6	31440552		A	T	0.1166	0.399	0.0542	1.875e-13
rs3093958	6	31442744		A	G	0.8842	-0.3974	0.0544	2.893e-13
rs9267092	6	31446464		T	G	0.1165	0.3983	0.0542	2.103e-13
rs3131623	6	31451033		A	T	0.1463	0.2856	0.0487	4.357e-09
rs3093956	6	31459190		T	C	0.8493	-0.2757	0.048	8.945e-09
rs9267123	6	31459618		C	G	0.1279	0.3689	0.0517	9.519e-13
rs146648476	6	31460969		CATAG	C	0.1501	0.3063	0.0504	1.248e-09
rs3130477	6	31461143		T	C	0.8829	-0.3992	0.054	1.382e-13
rs3094228	6	31462150		T	C	0.8245	-0.279	0.0435	1.472e-10
rs3132089	6	31462233		A	G	0.1161	0.4041	0.0542	9.43e-14
rs3099839	6	31462288		T	C	0.1161	0.4041	0.0542	9.418e-14
rs3094605	6	31462917		C	G	0.1161	0.4037	0.0543	1.003e-13
rs3099840	6	31462944		A	G	0.8245	-0.2787	0.0436	1.572e-10
rs3132090	6	31462975		A	G	0.116	0.4029	0.0543	1.155e-13
rs3130907	6	31464036		A	G	0.8839	-0.4043	0.0543	9.178e-14
rs3094014	6	31465781		A	G	0.1659	0.3024	0.045	1.887e-11
rs3128986	6	31465916		T	C	0.8615	-0.4142	0.0754	3.948e-08
rs3131620	6	31466054		A	G	0.8344	-0.3007	0.0451	2.53e-11
rs3094604	6	31466334		A	G	0.8383	-0.3173	0.0456	3.5e-12
rs3128987	6	31466421		T	C	0.8341	-0.3019	0.045	2.063e-11
rs3131619	6	31466554		A	T	0.8839	-0.4052	0.0543	8.261e-14
rs3094013	6	31466589		A	G	0.1161	0.4049	0.0543	8.458e-14
rs3094012	6	31466743		C	G	0.1199	0.379	0.0532	1.042e-12
rs3131618	6	31466844		A	G	0.8845	-0.4026	0.0545	1.506e-13
rs3131643	6	31475005		A	G	0.14	0.343	0.0489	2.337e-12
rs2523654	6	31477127		C	G	0.3339	0.2185	0.034	1.346e-10
rs2516435	6	31477157		A	C	0.3339	0.2186	0.034	1.34e-10
rs2516515	6	31477190		A	C	0.6661	-0.2189	0.034	1.246e-10
rs2844502	6	31477439		A	G	0.334	0.218	0.034	1.482e-10
rs2248251	6	31477721		A	G	0.3341	0.2184	0.034	1.358e-10
rs2395488	6	31478132		A	G	0.6658	-0.2187	0.034	1.302e-10
rs5875322	6	31478171		G	GTCTTGCT	0.6685	-0.2601	0.0378	5.635e-12
rs2395489	6	31478230		T	C	0.6665	-0.2197	0.034	1.094e-10
rs2248351	6	31478232		A	C	0.6682	-0.2583	0.0377	7.672e-12
rs2248352	6	31478241		A	G	0.6737	-0.2245	0.0342	5.245e-11
rs2905726	6	31478311		C	G	0.334	0.2187	0.034	1.288e-10
rs2904778	6	31478312		C	G	0.6677	-0.2569	0.0377	9.164e-12
rs2904777	6	31478352		T	C	0.666	-0.2186	0.034	1.307e-10
rs2516425	6	31478423		A	G	0.666	-0.218	0.034	1.467e-10
rs533418648	6	31478445		G	GAGA	0.3324	0.2571	0.0377	8.819e-12
rs2248459	6	31478933		A	G	0.6666	-0.2201	0.034	9.646e-11
rs2243429	6	31479043		T	G	0.334	0.218	0.034	1.462e-10
rs2596536	6	31480071		T	C	0.3341	0.2177	0.034	1.549e-10
rs2516424	6	31480538		A	G	0.666	-0.2181	0.034	1.428e-10
rs2248613	6	31480655		T	G	0.334	0.218	0.034	1.455e-10
rs2248617	6	31480756		T	C	0.334	0.218	0.034	1.473e-10
rs3099843	6	31480787		T	G	0.1193	0.3818	0.0532	6.962e-13
rs3099844	6	31481199		A	C	0.1193	0.3813	0.0532	7.298e-13
rs2248709	6	31481269		A	G	0.666	-0.2186	0.034	1.317e-10
rs3130908	6	31481775		T	C	0.8832	-0.4025	0.0539	8.062e-14
rs3130909	6	31481933		T	C	0.8832	-0.4027	0.0539	7.954e-14
rs2516510	6	31482137		T	C	0.6994	-0.2109	0.035	1.738e-09
rs2516508	6	31482563		T	C	0.6993	-0.2108	0.035	1.755e-09
rs3131642	6	31482860		A	G	0.1193	0.3792	0.0532	1.009e-12
rs2860233	6	31482925		A	G	0.3008	0.2111	0.035	1.682e-09
rs2905751	6	31482961		C	G	0.3007	0.2112	0.035	1.632e-09
rs2523708	6	31483502		T	C	0.3006	0.2131	0.035	1.204e-09
rs3132470	6	31483593		A	G	0.8809	-0.3831	0.0533	6.324e-13
rs2523707	6	31483755		A	G	0.6982	-0.2126	0.035	1.316e-09
rs2523706	6	31483790		T	C	0.6993	-0.2111	0.035	1.676e-09
rs3094011	6	31484059		T	C	0.8807	-0.3825	0.0532	6.457e-13
rs3094010	6	31484071		T	C	0.1193	0.3825	0.0532	6.45e-13
rs2904601	6	31484146		A	T	0.3007	0.2111	0.035	1.666e-09
rs28405701	6	31484313		A	G	0.292	0.2278	0.0355	1.43e-10
rs2516506	6	31484490		C	G	0.6993	-0.2111	0.035	1.678e-09
rs2516505	6	31484666		C	G	0.6993	-0.2112	0.035	1.65e-09
rs2516504	6	31484698		A	C	0.3009	0.2106	0.035	1.83e-09
rs2516419	6	31484896		T	C	0.3007	0.2111	0.035	1.659e-09
rs2523701	6	31485182		T	C	0.6994	-0.2116	0.035	1.529e-09
rs2523700	6	31485252		C	G	0.3044	0.2087	0.035	2.457e-09
	6	31485800		T	C	0.7109	-0.2948	0.0531	2.798e-08
rs2516500	6	31485863		T	C	0.3024	0.2042	0.0348	4.336e-09
rs3091286	6	31489256		A	T	0.6835	-0.2446	0.0383	1.737e-10
rs2507964	6	31490380		T	C	0.3188	0.2078	0.0346	1.894e-09
rs2428499	6	31490516		A	G	0.3187	0.208	0.0346	1.827e-09
rs2428498	6	31490683		A	G	0.3188	0.2078	0.0346	1.878e-09
rs9267294	6	31490737		A	G	0.6811	-0.2085	0.0346	1.662e-09
rs562490619	6	31490855		T	C	0.3168	0.2455	0.0383	1.465e-10
rs532758278	6	31490857		T	C	0.6831	-0.2454	0.0383	1.495e-10
rs2905724	6	31491177		A	G	0.3186	0.2151	0.0346	5.32e-10
rs2516417	6	31491859		C	G	0.6814	-0.2075	0.0346	1.994e-09
rs2516415	6	31491965		A	G	0.3186	0.2074	0.0346	1.999e-09
rs2395039	6	31492741		T	C	0.3186	0.2082	0.0346	1.765e-09
rs2516413	6	31493732		T	G	0.3167	0.2091	0.0347	1.644e-09
rs2534687	6	31493831		T	C	0.3151	0.2111	0.0348	1.281e-09
rs2253040	6	31494001		T	G	0.3209	0.2086	0.0345	1.541e-09
rs2253042	6	31494137		T	C	0.321	0.2088	0.0345	1.459e-09
rs2253052	6	31494254		T	C	0.3212	0.21	0.0345	1.145e-09
rs3130923	6	31494358		A	G	0.1165	0.4049	0.054	6.309e-14
rs2534685	6	31494468		T	C	0.3025	0.2216	0.035	2.454e-10
rs2516412	6	31494544		T	G	0.3027	0.222	0.035	2.215e-10
rs2534684	6	31494895		A	C	0.6973	-0.222	0.035	2.241e-10
rs2516499	6	31495548		A	G	0.6973	-0.222	0.035	2.221e-10
rs2516408	6	31495714		A	G	0.3017	0.2202	0.035	3.29e-10
rs534660224	6	31495756		A	ACTCGC	0.6995	-0.2547	0.0387	4.666e-11
rs2534680	6	31495800		T	C	0.6973	-0.222	0.035	2.225e-10
rs2534679	6	31496013		T	C	0.6973	-0.222	0.035	2.226e-10
rs2844501	6	31496588		C	G	0.3027	0.2225	0.035	2.029e-10
rs2534675	6	31497021		T	C	0.3027	0.2221	0.035	2.176e-10
rs3094005	6	31497270		T	G	0.1164	0.4002	0.054	1.274e-13
rs2534673	6	31497713		C	G	0.3027	0.222	0.035	2.231e-10
rs2534672	6	31497781		C	G	0.3027	0.2221	0.035	2.169e-10
rs575758508	6	31498054		CCT	C	0.6993	-0.255	0.0387	4.357e-11
rs2855816	6	31499102		A	G	0.3027	0.2223	0.035	2.121e-10
rs2855817	6	31499108		A	G	0.3026	0.2205	0.035	2.951e-10
rs2855802	6	31499334		T	G	0.3027	0.2223	0.035	2.112e-10
rs2855803	6	31499393		A	G	0.3027	0.2223	0.035	2.103e-10
rs2855804	6	31499588		T	C	0.3027	0.2223	0.035	2.102e-10
rs2855808	6	31501891		T	C	0.3027	0.2223	0.035	2.094e-10
rs3095233	6	31501997		A	G	0.8837	-0.4037	0.054	7.578e-14
rs2516427	6	31503677		T	C	0.6974	-0.2226	0.035	2.012e-10
rs2855812	6	31504943		T	G	0.2474	0.2426	0.0376	1.17e-10
rs1065075	6	31505784		A	G	0.6974	-0.2227	0.035	1.944e-10
rs3130616	6	31505969		A	G	0.1163	0.4036	0.054	7.643e-14
rs3134900	6	31506180		C	G	0.8814	-0.3881	0.0534	3.566e-13
rs1051788	6	31506223		A	G	0.3026	0.2227	0.035	1.958e-10
rs2844499	6	31508136		A	T	0.6954	-0.2245	0.0349	1.283e-10
rs3130614	6	31508681		A	T	0.1138	0.4252	0.0547	7.383e-15
rs2246618	6	31511209		T	C	0.3022	0.2265	0.035	9.365e-11
rs2516400	6	31513328		A	G	0.3041	0.2257	0.0349	1.026e-10
rs3130612	6	31514320		T	G	0.8864	-0.4297	0.0547	3.915e-15
rs9267445	6	31515704		C	G	0.1159	0.4141	0.0542	2.096e-14
rs529792575	6	31530467		G	GC	0.8833	-0.4144	0.0561	1.47e-13
rs2734583	6	31537703		A	G	0.8832	-0.4052	0.0538	4.852e-14
rs9267488	6	31546470		A	G	0.8841	-0.4079	0.0541	4.706e-14
rs1800629	6	31575254		A	G	0.1661	0.2513	0.0454	3.196e-08
rs1800628	6	31579073		A	G	0.1134	0.4297	0.0547	3.812e-15
rs3130063	6	31590925		T	C	0.1158	0.417	0.0542	1.355e-14
rs3130631	6	31598391		C	G	0.8842	-0.4187	0.0542	1.065e-14
rs2857595	6	31600692		A	G	0.2036	0.2286	0.0415	3.492e-08
rs3132451	6	31614248		C	G	0.1901	0.2766	0.0423	6.432e-11
rs3130621	6	31619306		T	C	0.8179	-0.2929	0.0432	1.183e-11
rs3130070	6	31624031		A	G	0.8177	-0.2937	0.0432	1.05e-11
rs3130622	6	31624747		C	G	0.1819	0.2954	0.0432	8.287e-12
rs3115664	6	31624859		T	C	0.1821	0.2933	0.0432	1.105e-11
rs3132450	6	31628361		A	G	0.89	-0.4546	0.055	1.395e-16
rs3130623	6	31629923		T	C	0.1901	0.2741	0.0425	1.147e-10
rs3130624	6	31630098		A	G	0.818	-0.2952	0.0432	8.407e-12
rs34834988	6	31630324		A	AT	0.5964	-0.2151	0.038	1.521e-08
rs3130626	6	31630712		A	G	0.8182	-0.2935	0.0432	1.097e-11
rs2736157	6	31633043		A	G	0.818	-0.2954	0.0432	8.177e-12
rs3130627	6	31633074		T	G	0.1818	0.2919	0.0432	1.414e-11
rs3115663	6	31634066		T	C	0.8179	-0.2919	0.0432	1.403e-11
rs11229	6	31635993		A	G	0.8179	-0.2917	0.0432	1.434e-11
rs10885	6	31636814		T	C	0.1819	0.2913	0.0432	1.537e-11
rs3130046	6	31638621		C	G	0.8181	-0.2939	0.0432	1.028e-11
rs570358423	6	31639124		CAAAG	C	0.1827	0.3134	0.0462	1.219e-11
rs554994006	6	31639319		T	TC	0.8173	-0.3264	0.0476	6.711e-12
rs3130628	6	31641495		T	C	0.8178	-0.2913	0.0432	1.468e-11
rs3130047	6	31642702		T	C	0.182	0.2936	0.0432	1.053e-11
rs3117583	6	31651799		A	G	0.818	-0.2957	0.0432	7.575e-12
rs3117582	6	31652743		T	G	0.8901	-0.4575	0.0549	8.414e-17
rs3117581	6	31657087		A	G	0.8901	-0.4558	0.055	1.105e-16
rs3132449	6	31658236		T	C	0.1099	0.4565	0.0549	9.659e-17
rs3130618	6	31664357		A	C	0.182	0.2943	0.0432	9.395e-12
rs3117579	6	31665719		T	G	0.1819	0.2951	0.0432	8.481e-12
rs9267531	6	31668965		A	G	0.8901	-0.4572	0.055	8.829e-17
rs9267539	6	31698647		A	C	0.8903	-0.4619	0.055	4.611e-17
rs9267544	6	31703780		A	C	0.1094	0.4647	0.0551	3.429e-17
rs9267549	6	31709614		A	G	0.1096	0.4666	0.055	2.313e-17
rs3131383	6	31736517		T	G	0.1099	0.4643	0.0549	2.706e-17
rs3101018	6	31738087		T	C	0.1097	0.4674	0.0549	1.748e-17
rs3131381	6	31740686		A	C	0.1097	0.4675	0.0549	1.637e-17
rs3131380	6	31742001		A	G	0.8902	-0.4669	0.0549	1.772e-17
rs3132445	6	31744419		A	G	0.1097	0.4658	0.0549	2.18e-17
rs3132443	6	31746254		A	G	0.1097	0.4677	0.0549	1.581e-17
rs3130484	6	31748105		T	C	0.8902	-0.4651	0.0549	2.405e-17
rs3117573	6	31750619		C	G	0.8903	-0.4677	0.0549	1.575e-17
rs3131379	6	31753256		A	G	0.1098	0.4665	0.0549	1.864e-17
rs3117574	6	31757453		A	G	0.1098	0.465	0.0549	2.443e-17
rs3131378	6	31757508		A	G	0.8902	-0.4652	0.0549	2.375e-17
rs3117575	6	31758476		T	C	0.8901	-0.4649	0.0549	2.503e-17
rs3117576	6	31759017		T	C	0.8902	-0.4661	0.0549	2.026e-17
rs3117577	6	31759697		A	G	0.8902	-0.4664	0.0549	2.018e-17
rs3115672	6	31760120		T	C	0.1098	0.4648	0.0549	2.527e-17
rs3101017	6	31765689		T	C	0.8903	-0.4688	0.0549	1.366e-17
rs533434563	6	31766173		CAG	C	0.8898	-0.4851	0.0569	1.449e-17
rs3115671	6	31766568		T	G	0.1097	0.4708	0.0549	9.551e-18
rs3130490	6	31771343		T	G	0.1097	0.4693	0.0549	1.312e-17
rs3130491	6	31777687		A	G	0.1078	0.4639	0.0554	5.242e-17
rs915652	6	31781365		A	G	0.1086	0.4738	0.0552	8.938e-18
rs915651	6	31781407		A	G	0.1086	0.4735	0.0552	9.593e-18
rs2753961	6	31787053		T	C	0.8677	-0.5431	0.0844	1.248e-10
rs2607014	6	31793436		A	G	0.1096	0.4741	0.055	6.343e-18
rs533681143	6	31798087		A	T	0.1447	0.513	0.0824	4.829e-10
rs2736425	6	31798207		A	G	0.1095	0.4739	0.055	6.535e-18
rs2763980	6	31798883		T	C	0.1095	0.4747	0.055	5.909e-18
rs553331667	6	31799896		T	TA	0.8892	-0.4764	0.0567	4.326e-17
rs681331	6	31801022		A	C	0.8719	-0.5108	0.0784	7.379e-11
rs625421	6	31804316		A	C	0.1095	0.4739	0.055	6.572e-18
rs553414	6	31809415		A	G	0.8905	-0.4764	0.0549	4.182e-18
rs1265947	6	31819390		T	C	0.1094	0.4788	0.0549	2.807e-18
rs144929896	6	31830357		T	TA	0.11	0.4897	0.0569	7.234e-18
rs3115674	6	31831299		T	G	0.8823	-0.4376	0.053	1.437e-16
rs3130476	6	31834324		T	C	0.1095	0.4764	0.0549	4.118e-18
rs3130478	6	31838136		T	C	0.1102	0.4746	0.0549	5.582e-18
rs3130679	6	31839763		A	G	0.8903	-0.4758	0.0549	4.527e-18
rs599707	6	31840659		T	C	0.1095	0.4761	0.0549	4.247e-18
rs9267574	6	31842835		T	C	0.1095	0.4764	0.0549	4.091e-18
rs9267578	6	31850331		T	C	0.1094	0.4766	0.055	4.38e-18
rs566020978	6	31856684		A	AT	0.6411	-0.3189	0.0558	1.121e-08
rs67682613	6	31858928		A	G	0.1395	0.3833	0.0482	1.73e-15
rs515688	6	31864261		A	G	0.8906	-0.4768	0.055	4.084e-18
rs693906	6	31867387		C	G	0.1388	0.3863	0.0483	1.288e-15
rs501942	6	31872700		T	C	0.1092	0.4836	0.0549	1.297e-18
rs558702	6	31902549		A	G	0.1092	0.4843	0.0549	1.159e-18
rs519417	6	31910656		A	G	0.109	0.4832	0.055	1.51e-18
rs532086	6	31913532		T	C	0.8357	-0.2959	0.0464	1.827e-10
rs497309	6	31924707		A	C	0.891	-0.4852	0.0549	9.441e-19
rs1265905	6	31942164		A	G	0.874	-0.5191	0.079	5.104e-11
rs1270942	6	31951083		A	G	0.891	-0.4882	0.0548	5.576e-19
rs389884	6	31973120		A	G	0.8909	-0.4811	0.0548	1.636e-18
	6	32037490		T	C	0.1073	0.4827	0.0566	1.468e-17
rs397948	6	32043937		A	G	0.6211	0.2221	0.038	5.032e-09
rs433061	6	32047051		A	G	0.1088	0.4768	0.055	4.468e-18
rs367364	6	32052169		T	C	0.1456	0.4114	0.0473	3.578e-18
rs527506034	6	32052461		A	G	0.8357	-0.4217	0.0654	1.128e-10
rs394439	6	32057778		A	C	0.1456	0.4109	0.0473	3.892e-18
rs369637	6	32058086		T	C	0.1456	0.4109	0.0473	3.892e-18
rs1150758	6	32060372		C	G	0.1457	0.4096	0.0473	4.792e-18
rs1150757	6	32061428		A	G	0.1089	0.4756	0.055	4.923e-18
rs1265889	6	32065839		A	G	0.1456	0.4105	0.0473	4.148e-18
rs1150756	6	32067917		T	C	0.109	0.4739	0.0548	5.496e-18
rs1150755	6	32070773		T	C	0.1456	0.4057	0.0473	1.029e-17
rs1150754	6	32082981		T	C	0.1456	0.4084	0.0473	6.323e-18
rs1150753	6	32092090		A	G	0.8911	-0.4754	0.0549	5.111e-18
rs1150752	6	32096949		T	C	0.891	-0.4705	0.055	1.245e-17
rs1265888	6	32098670		A	G	0.1466	0.397	0.0471	3.51e-17
rs572735132	6	32099726		G	GA	0.1894	0.439	0.0717	9.454e-10
rs1269852	6	32112414		C	G	0.1087	0.4704	0.055	1.201e-17
rs3130288	6	32128224		A	C	0.1264	0.4985	0.0785	2.144e-10
rs3134962	6	32140074		A	G	0.1463	0.4023	0.0473	1.725e-17
rs3130277	6	32142806		C	G	0.1969	0.2273	0.0416	4.563e-08
rs539526798	6	32160342		G	GC	0.1943	0.2737	0.0452	1.449e-09
rs3132941	6	32164195		C	G	0.1099	0.466	0.0546	1.481e-17
rs9267816	6	32165367		T	C	0.8057	-0.2754	0.0453	1.18e-09
rs3130349	6	32179919		A	G	0.1727	0.2558	0.0438	5.396e-09
rs1062070	6	32180254		A	G	0.8273	-0.254	0.0439	6.968e-09
rs8365	6	32180626		C	G	0.1728	0.2513	0.0439	1.033e-08
rs3134941	6	32181760		C	G	0.8274	-0.2561	0.0439	5.55e-09
rs3134940	6	32182039		T	C	0.827	-0.253	0.0438	7.955e-09
rs3131300	6	32184157		A	G	0.8273	-0.2549	0.0439	6.171e-09
rs1800625	6	32184665		A	G	0.8269	-0.2552	0.0438	5.831e-09
rs169504	6	32185629		A	C	0.1622	0.3784	0.0456	1.042e-16
rs3134605	6	32192179		T	C	0.8059	-0.2457	0.0417	3.675e-09
rs204991	6	32193589		T	C	0.8134	-0.2406	0.0423	1.274e-08
rs204990	6	32193653		A	C	0.1866	0.2388	0.0423	1.651e-08
rs204989	6	32194075		A	G	0.1865	0.2381	0.0423	1.83e-08
rs2071278	6	32197667		A	G	0.8469	-0.3085	0.0462	2.446e-11
rs3134942	6	32200994		T	G	0.1355	0.3658	0.0488	6.927e-14
rs3132935	6	32203298		A	G	0.806	-0.2422	0.0417	6.325e-09
rs538082098	6	32203357		T	TA	0.8464	-0.3507	0.0494	1.264e-12
rs3131296	6	32205216		T	C	0.1356	0.364	0.0488	8.982e-14
rs3130291	6	32207554		A	G	0.194	0.2416	0.0417	6.964e-09
rs3130292	6	32208431		C	G	0.1939	0.243	0.0417	5.478e-09
rs3132947	6	32209005		T	G	0.1938	0.2422	0.0417	6.379e-09
rs3132956	6	32211661		A	G	0.1357	0.3637	0.0488	9.397e-14
rs8192589	6	32219860		T	G	0.1299	0.3668	0.0504	3.511e-13
rs3134796	6	32222144		A	G	0.864	-0.3654	0.0488	6.689e-14
rs3134930	6	32223843		T	C	0.2226	0.2326	0.0393	3.33e-09
rs3130295	6	32225442		T	C	0.2105	0.2308	0.0401	8.719e-09
rs3096690	6	32226853		C	G	0.1114	0.4594	0.0542	2.198e-17
rs3130297	6	32231204		T	C	0.1118	0.4703	0.0539	2.658e-18
rs377763	6	32231367		A	C	0.1953	0.276	0.0413	2.401e-11
rs6918888	6	32233502		C	G	0.1472	0.349	0.0467	7.917e-14
rs3096692	6	32233749		A	G	0.8376	-0.425	0.0741	9.507e-09
rs138828503	6	32236099		A	G	0.8376	-0.4283	0.0741	7.499e-09
rs3134925	6	32236880		A	G	0.1472	0.3494	0.0467	7.394e-14
rs3134924	6	32236907		T	G	0.1472	0.3494	0.0467	7.417e-14
rs527749768	6	32237042		CG	C	0.8524	-0.3833	0.0498	1.431e-14
rs561980536	6	32237795		G	GAT	0.8379	-0.4302	0.0743	6.884e-09
rs3130303	6	32238090		A	G	0.8528	-0.3493	0.0467	7.501e-14
rs6901158	6	32238165		T	C	0.1475	0.349	0.0466	7.033e-14
rs9267920	6	32238466		T	C	0.1517	0.3589	0.0493	3.336e-13
rs564872200	6	32238597		T	TA	0.8365	-0.4181	0.0746	2.067e-08
rs9267922	6	32238688		A	G	0.2223	0.2397	0.0401	2.199e-09
rs3130304	6	32239404		A	G	0.203	0.2719	0.0406	2.215e-11
rs416352	6	32239616		T	G	0.296	0.2041	0.036	1.495e-08
rs393481	6	32240182		T	C	0.7037	-0.2071	0.036	9.205e-09
rs424232	6	32240547		T	C	0.2518	0.2465	0.038	8.504e-11
rs394038	6	32240921		A	G	0.2622	0.2274	0.0375	1.313e-09
rs507778	6	32242084		T	C	0.3069	0.2039	0.0357	1.106e-08
rs529729079	6	32250343		A	G	0.1256	0.513	0.0783	5.766e-11
rs558281186	6	32252121		A	G	0.1258	0.5171	0.0783	3.9e-11
rs9268026	6	32258704		A	G	0.8896	-0.4803	0.0544	9.986e-19
rs146576271	6	32262212		T	TG	0.1112	0.4789	0.0563	1.867e-17
rs3132971	6	32262479		T	G	0.8895	-0.4781	0.0543	1.282e-18
rs9268075	6	32265323		T	G	0.1112	0.4789	0.0563	1.869e-17
rs3115556	6	32272295		A	T	0.1105	0.476	0.0543	1.851e-18
rs9268123	6	32284355		A	G	0.8895	-0.4761	0.0543	1.806e-18
rs9268144	6	32289422		T	C	0.8895	-0.4761	0.0543	1.827e-18
	6	32290353		G	GCAAA	0.0965	0.4411	0.0753	4.801e-09
rs7775397	6	32293475		T	G	0.8895	-0.4757	0.0543	1.944e-18
rs9268152	6	32295886		T	C	0.1106	0.4757	0.0543	1.934e-18
rs9268158	6	32301680		T	C	0.1105	0.4758	0.0543	1.918e-18
rs9268177	6	32307105		A	C	0.1105	0.4772	0.0543	1.45e-18
rs9268178	6	32307844		T	C	0.1105	0.4772	0.0543	1.452e-18
rs9268193	6	32309594		A	C	0.8702	-0.5271	0.0848	5.132e-10
rs9268208	6	32312814		T	C	0.8785	-0.5323	0.0809	4.7e-11
rs9268219	6	32316331		T	G	0.8926	-0.4636	0.0546	2.186e-17
rs116667074	6	32317585		T	C	0.1105	0.477	0.0543	1.494e-18
rs7751715	6	32321175		A	G	0.1105	0.4771	0.0543	1.476e-18
rs9268235	6	32322431		T	C	0.1119	0.4715	0.0537	1.688e-18
rs113826589	6	32327654		CT	C	0.1977	0.3916	0.0699	2.099e-08
rs4392743	6	32327875		T	C	0.8895	-0.4759	0.0543	1.867e-18
rs5875357	6	32331747		CA	C	0.8194	-0.2638	0.0469	1.893e-08
rs541192549	6	32334326		T	TTG	0.1111	0.4783	0.0564	2.201e-17
rs1265757	6	32334605		T	C	0.1105	0.4781	0.0543	1.279e-18
rs1265754	6	32335915		A	T	0.1107	0.4735	0.0542	2.479e-18
rs926593	6	32337767		A	G	0.8895	-0.4782	0.0543	1.259e-18
rs2849018	6	32343086		T	C	0.8894	-0.4773	0.0543	1.422e-18
rs910051	6	32347734		T	G	0.8895	-0.4779	0.0543	1.312e-18
rs529018699	6	32349446		CATCTT	C	0.8193	-0.2636	0.0469	1.939e-08
rs2395149	6	32357785		A	G	0.1105	0.4755	0.0543	1.97e-18
rs3129927	6	32366050		A	C	0.8743	-0.513	0.0783	5.644e-11
rs1980496	6	32372293		T	C	0.3666	0.1876	0.0335	2.091e-08
rs3117109	6	32373094		T	C	0.1079	0.4672	0.0548	1.541e-17
rs2894251	6	32375459		A	G	0.8829	-0.4177	0.0526	1.988e-15
rs2395151	6	32375562		A	G	0.1171	0.4177	0.0526	1.991e-15
rs3117106	6	32375592		T	C	0.8666	-0.3603	0.0487	1.418e-13
rs2894254	6	32377912		T	G	0.8897	-0.4664	0.0542	8.011e-18
rs150353632	6	32378686		A	ATTTTGTG	0.1176	0.4223	0.055	1.672e-14
rs200411589	6	32379293		A	AAT	0.1107	0.475	0.0564	3.601e-17
rs3117103	6	32381780		A	T	0.8827	-0.4179	0.0526	1.862e-15
rs9268469	6	32385813		A	G	0.1254	0.4321	0.0536	7.559e-16
rs3129950	6	32390424		C	G	0.1101	0.4665	0.0543	8.364e-18
rs3117097	6	32390912		A	G	0.8439	-0.3069	0.0462	3.033e-11
rs3129953	6	32394044		T	C	0.1537	0.2394	0.0423	1.515e-08
rs1980493	6	32395438		T	C	0.8438	-0.3071	0.0461	2.841e-11
rs3129956	6	32400685		A	G	0.1251	0.4937	0.0781	2.616e-10
rs2395158	6	32406818		A	G	0.8437	-0.3091	0.0461	2.099e-11
rs3129959	6	32408019		A	T	0.8437	-0.3094	0.0461	2.025e-11
rs7773668	6	32410047		C	G	0.8707	-0.5169	0.0848	1.08e-09
rs9268510	6	32410726		A	G	0.1293	0.5168	0.0848	1.086e-09
rs3129962	6	32411606		A	G	0.1103	0.47	0.0545	6.097e-18
rs3129966	6	32413503		C	G	0.11	0.4679	0.0544	7.771e-18
rs2227138	6	32416723		T	C	0.1498	0.3363	0.0473	1.123e-12
rs3135371	6	32418922		A	G	0.8501	-0.3389	0.0472	7.258e-13
rs2395160	6	32419655		A	G	0.1099	0.4654	0.0544	1.234e-17
rs2894255	6	32422555		T	C	0.1532	0.3889	0.0674	8.029e-09
rs3135353	6	32425100		T	C	0.1489	0.3386	0.0474	9.177e-13
rs2105902	6	32427921		A	T	0.8512	-0.3368	0.0474	1.25e-12
rs3129843	6	32427949		A	G	0.89	-0.4652	0.0544	1.25e-17
rs3129855	6	32431064		A	G	0.8751	-0.4979	0.0783	2.011e-10
rs3129856	6	32431560		T	C	0.8901	-0.4637	0.0544	1.594e-17
rs3129861	6	32433755		A	T	0.1489	0.3359	0.0474	1.421e-12
rs3135394	6	32440720		A	G	0.8898	-0.4685	0.0544	6.793e-18
rs7383481	6	32446658		T	C	0.1099	0.4711	0.0544	4.794e-18
rs3039353	6	32448000		CAT	C	0.795	-0.2505	0.0453	3.161e-08
rs574185477	6	32449206		T	G	0.1288	0.5371	0.0851	2.703e-10
rs3129897	6	32453692		A	G	0.1481	0.3421	0.0477	7.155e-13
rs9279685	6	32455751		T	TC	0.1894	0.3868	0.0695	2.665e-08
rs9268813	6	32456817		T	C	0.8924	-0.4715	0.0549	9.367e-18
rs7763411	6	32457215		T	C	0.1098	0.4725	0.0545	4.188e-18
rs9269032	6	32469977		A	G	0.102	0.4927	0.0594	1.109e-16
rs9269075	6	32473018		C	G	0.8884	-0.5877	0.0946	5.257e-10
rs564573434	6	32475738		G	GA	0.1164	0.5653	0.093	1.227e-09
rs7747236	6	32534622		T	C	0.1376	0.5162	0.0884	5.157e-09
rs1894553	6	32535089		A	C	0.1433	0.5046	0.0876	8.496e-09
rs115938440	6	32535643		A	C	0.136	0.5104	0.0898	1.313e-08
rs116765893	6	32535668		A	T	0.136	0.5105	0.0898	1.309e-08
rs559469172	6	32535712		A	G	0.1378	0.5215	0.0899	6.673e-09
rs115250958	6	32542065		A	C	0.1157	0.6126	0.1022	2.046e-09
rs116105128	6	32543679		C	G	0.1198	0.599	0.1007	2.708e-09
rs11756657	6	32544514		C	G	0.8591	-0.5257	0.0899	5.006e-09
rs116312062	6	32559268		T	G	0.8658	-0.5109	0.0922	3.035e-08
rs16822820	6	32584283		A	T	0.7764	-0.4149	0.0756	4.03e-08
rs9270475	6	32591230		A	T	0.7945	-0.3414	0.0447	2.228e-14
rs9270493	6	32591333		T	C	0.7981	-0.2985	0.0414	5.747e-13
rs4713552	6	32593207		T	C	0.2239	0.3572	0.0655	4.898e-08
rs9270573	6	32593237		T	G	0.8035	-0.3631	0.0448	4.929e-16
rs9279765	6	32593242		A	AC	0.1768	0.3573	0.0584	9.546e-10
rs9270600	6	32593916		T	C	0.2353	0.2807	0.0401	2.547e-12
rs3998182	6	32594138		T	C	0.7772	-0.3356	0.044	2.4e-14
rs9270604	6	32597023		T	C	0.6771	-0.2225	0.0388	9.849e-09
rs9270606	6	32597092		T	C	0.3419	0.219	0.0386	1.36e-08
rs9270609	6	32597274		A	T	0.6792	-0.2273	0.0388	4.559e-09
rs576725097	6	32597291		G	GT	0.3207	0.227	0.0388	4.823e-09
rs9270611	6	32597298		T	C	0.2616	0.2819	0.041	6.051e-12
rs9270612	6	32597329		T	C	0.678	-0.2247	0.0388	6.9e-09
rs9270614	6	32597338		A	C	0.3229	0.1951	0.0356	4.271e-08
rs9270616	6	32597377		C	G	0.6706	-0.2221	0.0388	1.029e-08
rs9270620	6	32597495		A	T	0.1975	0.362	0.0445	3.87e-16
rs9270621	6	32597506		A	G	0.3224	0.2263	0.0388	5.324e-09
rs9270623	6	32597554		A	C	0.7964	-0.2982	0.041	3.443e-13
rs9270626	6	32597666		T	G	0.3224	0.2276	0.0388	4.514e-09
rs9270647	6	32598028		A	C	0.6798	-0.2284	0.0388	3.962e-09
rs9270654	6	32598169		T	G	0.6779	-0.2262	0.0388	5.524e-09
rs9270655	6	32598189		A	T	0.679	-0.226	0.0388	5.508e-09
rs9270659	6	32598299		T	C	0.3148	0.2308	0.0391	3.517e-09
rs9270660	6	32598300		A	G	0.6852	-0.2308	0.0391	3.517e-09
rs9270661	6	32598310		A	G	0.6852	-0.2308	0.0391	3.506e-09
rs9270662	6	32598312		T	G	0.8017	-0.359	0.0444	6.644e-16
rs9270665	6	32598455		T	G	0.2037	0.2981	0.041	3.442e-13
rs4599680	6	32598517		T	C	0.7961	-0.2976	0.041	3.849e-13
rs9270667	6	32598529		T	C	0.675	-0.225	0.0389	7.03e-09
rs76190048	6	32598720		A	G	0.1983	0.3592	0.0445	6.437e-16
rs2858875	6	32598872		T	C	0.6783	-0.2293	0.0388	3.461e-09
	6	32599006		T	TAACA	0.1045	0.4451	0.0728	9.688e-10
	6	32599010		A	ATTTTTTT	0.8955	-0.4451	0.0728	9.688e-10
rs590999	6	32599731		A	G	0.1996	0.3008	0.0411	2.653e-13
rs592362	6	32600018		A	G	0.7714	-0.2633	0.0395	2.629e-11
rs3998183	6	32600169		T	C	0.2259	0.3085	0.0428	5.701e-13
rs9270789	6	32601431		A	G	0.2454	0.3482	0.0634	3.905e-08
rs2454137	6	32602372		A	G	0.7557	-0.2844	0.0394	5.381e-13
rs678770	6	32603040		A	T	0.2158	0.2773	0.0407	9.032e-12
rs9270868	6	32603340		A	G	0.8062	-0.3675	0.045	3.288e-16
rs9270910	6	32604403		C	G	0.4993	0.2484	0.0365	9.872e-12
rs9270911	6	32604425		T	C	0.5265	0.2	0.032	4.222e-10
rs74812635	6	32605762		C	G	0.2043	0.3006	0.0407	1.54e-13
rs75324027	6	32605852		A	G	0.7702	-0.2658	0.0392	1.173e-11
rs566861	6	32608761		T	C	0.7104	-0.2154	0.0364	3.416e-09
rs647467	6	32608949		T	C	0.2657	0.2396	0.0384	4.487e-10
rs535777	6	32609856		C	G	0.1364	0.4546	0.0734	5.805e-10
rs674313	6	32610305		T	C	0.2374	0.2577	0.0387	2.748e-11
rs1281937	6	32610366		T	C	0.7363	-0.2397	0.0376	1.736e-10
rs2858864	6	32610452		T	C	0.2249	0.2704	0.0408	3.234e-11
rs2858863	6	32610501		T	C	0.2084	0.2849	0.0415	6.324e-12
rs9271187	6	32610537		T	C	0.7504	-0.2829	0.0416	1.01e-11
rs9271188	6	32610543		T	C	0.2496	0.283	0.0416	9.942e-12
rs9271190	6	32610592		A	C	0.256	0.2496	0.0378	4.203e-11
rs77064057	6	32610876		A	G	0.7442	-0.2489	0.0379	4.966e-11
rs75639337	6	32610879		T	C	0.3235	0.258	0.0384	1.719e-11
rs76946723	6	32611140		A	T	0.7442	-0.2484	0.0378	5.157e-11
rs502771	6	32611193		T	C	0.7441	-0.248	0.0378	5.58e-11
rs111354037	6	32611508		A	C	0.7348	-0.3359	0.0607	3.194e-08
rs583177	6	32611790		A	C	0.2497	0.2814	0.0416	1.29e-11
rs9271237	6	32611874		A	G	0.7496	-0.2808	0.0415	1.323e-11
rs9271238	6	32611925		T	C	0.2791	0.2496	0.0378	3.948e-11
rs3104421	6	32612230		A	G	0.25	0.2818	0.0415	1.125e-11
rs3104420	6	32612251		A	G	0.25	0.2818	0.0415	1.129e-11
rs2858862	6	32612544		T	C	0.2665	0.3352	0.0604	2.927e-08
rs2647094	6	32612545		A	G	0.7335	-0.3352	0.0604	2.927e-08
rs80243928	6	32612794		T	C	0.2558	0.2487	0.0379	5.049e-11
rs9271262	6	32612808		A	G	0.75	-0.2817	0.0415	1.14e-11
rs79838044	6	32612855		T	C	0.7502	-0.2826	0.0415	1.02e-11
rs77568742	6	32613013		T	C	0.7496	-0.2811	0.0415	1.291e-11
rs9271268	6	32613029		A	G	0.359	0.2238	0.038	3.939e-09
rs9271269	6	32613043		T	G	0.359	0.2238	0.038	3.932e-09
rs76662008	6	32613092		C	G	0.7498	-0.2831	0.0416	9.793e-12
rs9271272	6	32613117		T	C	0.6887	-0.2211	0.033	2.209e-11
rs9271273	6	32613125		A	G	0.3584	0.2251	0.0381	3.551e-09
rs9271274	6	32613158		A	C	0.6425	-0.2271	0.0382	2.637e-09
rs9271275	6	32613184		A	T	0.643	-0.2252	0.0383	4.12e-09
rs9271276	6	32613194		A	C	0.6431	-0.2249	0.0383	4.41e-09
rs9271277	6	32613221		T	C	0.6425	-0.2253	0.0382	3.783e-09
rs9271278	6	32613239		A	G	0.6422	-0.2248	0.0382	3.868e-09
rs9271279	6	32613241		A	G	0.6422	-0.2248	0.0382	3.868e-09
rs9271280	6	32613270		A	T	0.25	0.2819	0.0416	1.294e-11
rs9271281	6	32613282		T	C	0.3583	0.2253	0.0381	3.378e-09
rs9271282	6	32613285		T	C	0.642	-0.2253	0.0381	3.483e-09
rs9271283	6	32613315		A	T	0.3581	0.225	0.0381	3.372e-09
rs9271284	6	32613413		T	C	0.6419	-0.2246	0.038	3.438e-09
rs9271285	6	32613416		A	G	0.6419	-0.2246	0.038	3.438e-09
rs9271286	6	32613444		A	G	0.3691	0.1926	0.0346	2.587e-08
rs9271287	6	32613476		A	G	0.6331	-0.1946	0.0347	1.993e-08
rs9271288	6	32613483		A	G	0.6418	-0.2252	0.038	3.106e-09
rs9271289	6	32613528		T	C	0.368	0.1949	0.0346	1.849e-08
rs9271291	6	32613558		A	G	0.3586	0.2242	0.038	3.589e-09
rs9271292	6	32613573		T	C	0.6299	-0.1917	0.0346	2.903e-08
rs9271294	6	32613684		A	G	0.6417	-0.2252	0.038	3.114e-09
rs9271295	6	32613690		T	C	0.6352	-0.1993	0.0347	9.714e-09
rs9271296	6	32613724		A	G	0.6417	-0.2238	0.038	3.855e-09
rs9271299	6	32613760		C	G	0.3587	0.2242	0.038	3.557e-09
rs9271301	6	32613837		T	C	0.2551	0.249	0.0379	5.027e-11
rs9271302	6	32613844		T	C	0.6411	-0.2242	0.038	3.746e-09
rs9271304	6	32613871		A	G	0.3584	0.224	0.038	3.912e-09
rs9271305	6	32613872		T	C	0.3584	0.224	0.038	3.912e-09
rs9271306	6	32613881		A	G	0.6416	-0.224	0.038	3.911e-09
rs9271307	6	32613917		A	G	0.358	0.2248	0.038	3.236e-09
rs533269560	6	32614068		CG	C	0.3581	0.2246	0.0379	3.253e-09
rs567387425	6	32614173		A	AG	0.3581	0.2247	0.038	3.201e-09
rs521512	6	32614205		T	C	0.6299	-0.1924	0.0346	2.573e-08
rs641685	6	32614226		A	G	0.3581	0.2248	0.038	3.176e-09
rs642093	6	32614298		A	G	0.2289	0.2654	0.0392	1.205e-11
rs5004275	6	32614413		A	G	0.3582	0.2245	0.0379	3.322e-09
rs2858859	6	32614498		A	G	0.3701	0.1923	0.0346	2.614e-08
rs5004276	6	32614555		A	G	0.37	0.1924	0.0346	2.575e-08
rs5004277	6	32614577		T	C	0.3699	0.1915	0.0346	3.09e-08
rs7451962	6	32614658		A	G	0.3697	0.1908	0.0346	3.483e-08
rs550703793	6	32614674		T	C	0.2496	0.2819	0.0416	1.196e-11
rs9271324	6	32614705		C	G	0.6425	-0.2256	0.038	2.995e-09
rs9271326	6	32614750		T	C	0.2503	0.2817	0.0415	1.136e-11
rs9271327	6	32614756		C	G	0.3589	0.2243	0.038	3.591e-09
rs9271329	6	32614858		A	G	0.641	-0.2235	0.038	4.074e-09
rs9271330	6	32614863		A	G	0.2195	0.2347	0.0366	1.411e-10
rs9271331	6	32614895		T	C	0.3683	0.1929	0.0347	2.626e-08
rs9271332	6	32614897		T	C	0.6418	-0.2239	0.038	3.696e-09
rs9271333	6	32614901		T	C	0.2556	0.2481	0.0379	5.704e-11
rs9271334	6	32614934		A	C	0.7441	-0.248	0.0378	5.569e-11
rs9271336	6	32615100		A	G	0.3742	0.2194	0.0381	8.324e-09
rs9271337	6	32615104		T	C	0.3741	0.2194	0.0381	8.372e-09
rs9271338	6	32615108		T	G	0.6259	-0.2194	0.0381	8.321e-09
rs9271339	6	32615114		T	C	0.6259	-0.2195	0.0381	8.35e-09
rs540687976	6	32615161		A	AG	0.2493	0.2818	0.0416	1.3e-11
rs6917212	6	32615228		C	G	0.6211	-0.1986	0.0344	8.073e-09
rs9271342	6	32615345		C	G	0.2307	0.2624	0.0391	1.863e-11
rs7756741	6	32615421		A	T	0.2258	0.3121	0.0428	2.959e-13
rs7760731	6	32615624		A	C	0.2291	0.2649	0.0391	1.303e-11
rs542851571	6	32616054		C	G	0.1203	0.4731	0.0548	5.595e-18
rs9271352	6	32616161		T	C	0.7955	-0.3012	0.0406	1.113e-13
rs2647092	6	32616663		T	C	0.2256	0.3126	0.0428	2.708e-13
rs3129758	6	32616848		A	G	0.4072	-0.1963	0.0342	9.149e-09
rs3129761	6	32617727		C	G	0.4656	0.1984	0.033	1.795e-09
rs3104412	6	32618190		A	G	0.5374	-0.1976	0.0325	1.283e-09
rs562462	6	32618660		T	C	0.7754	-0.3574	0.0648	3.488e-08
rs9271364	6	32619010		A	G	0.5247	-0.2098	0.0327	1.319e-10
rs9271365	6	32619017		T	G	0.5992	-0.218	0.033	4.082e-11
rs557048	6	32619224		T	C	0.2299	0.3049	0.0427	9.195e-13
rs607998	6	32619261		A	G	0.1976	0.3622	0.0445	4.008e-16
rs9271379	6	32619556		T	C	0.2437	0.2834	0.0418	1.174e-11
rs9271401	6	32619748		A	G	0.7542	-0.2994	0.0416	6.515e-13
rs9271402	6	32619758		T	C	0.771	-0.3073	0.0428	6.791e-13
rs9271405	6	32619807		T	C	0.7645	-0.302	0.042	6.325e-13
rs9271407	6	32619828		T	C	0.2354	0.3019	0.042	6.369e-13
rs9271410	6	32619868		A	G	0.7653	-0.3022	0.0421	6.974e-13
rs9271412	6	32619908		T	C	0.2348	0.3032	0.042	5.245e-13
rs9271417	6	32620041		T	C	0.7655	-0.3037	0.042	4.992e-13
rs9271420	6	32620075		A	G	0.4696	-0.2431	0.0366	3.036e-11
rs9271424	6	32620145		T	C	0.7573	-0.2528	0.0383	3.975e-11
rs9271425	6	32620146		A	G	0.7574	-0.2521	0.0383	4.504e-11
rs9271427	6	32620206		A	G	0.7997	-0.3587	0.0444	6.406e-16
rs9271428	6	32620207		T	C	0.2003	0.3587	0.0444	6.406e-16
rs9271437	6	32620389		A	G	0.2433	0.252	0.0383	4.453e-11
rs9271439	6	32620457		A	G	0.7468	-0.2949	0.0418	1.686e-12
rs9271441	6	32620468		T	C	0.4703	-0.2446	0.0366	2.301e-11
rs9271443	6	32620486		A	C	0.7844	-0.3489	0.0438	1.706e-15
rs9271450	6	32620604		A	T	0.7401	-0.2767	0.0421	4.728e-11
rs9271451	6	32620605		A	T	0.7413	-0.2759	0.0421	5.467e-11
rs9271460	6	32620686		A	G	0.2599	0.2834	0.0421	1.66e-11
rs9271462	6	32620724		T	C	0.7592	-0.2998	0.0422	1.191e-12
rs9271471	6	32620888		C	G	0.7628	-0.3109	0.042	1.297e-13
rs76351919	6	32620926		C	G	0.1998	0.3698	0.0444	8.2e-17
rs9271484	6	32621128		T	G	0.2351	0.3025	0.042	5.742e-13
rs9271524	6	32622043		A	C	0.7741	-0.3562	0.0647	3.635e-08
rs9271528	6	32622146		T	C	0.2007	0.3042	0.0409	1.066e-13
rs9271538	6	32622206		A	G	0.2357	0.3015	0.042	6.653e-13
rs9271545	6	32622376		T	C	0.1972	0.3625	0.0445	3.655e-16
rs28362367	6	32622587		T	C	0.147	0.5003	0.0798	3.629e-10
rs9271562	6	32622634		A	G	0.2459	0.2496	0.0382	6.457e-11
rs2395224	6	32622705		C	G	0.8014	-0.359	0.0445	6.755e-16
rs3129763	6	32623148		A	G	0.2039	0.3033	0.0406	7.617e-14
rs3135003	6	32623699		T	C	0.2033	0.3022	0.0406	9.98e-14
rs373643278	6	32623754		A	AC	0.8039	-0.3646	0.0446	3.034e-16
rs9271612	6	32623877		A	G	0.8034	-0.364	0.0445	3.005e-16
rs9271619	6	32623996		A	G	0.1966	0.3637	0.0445	3.157e-16
rs9271626	6	32624167		A	C	0.2005	0.301	0.0409	1.857e-13
rs9271627	6	32624172		T	C	0.2007	0.3588	0.0444	6.768e-16
rs9271633	6	32624295		T	G	0.8033	-0.3643	0.0446	2.951e-16
rs9271656	6	32624797		A	T	0.221	0.3594	0.0652	3.547e-08
rs9271659	6	32624816		A	G	0.2205	0.365	0.0654	2.422e-08
rs9271666	6	32624916		T	C	0.8037	-0.3632	0.0445	3.46e-16
rs9271668	6	32624997		T	G	0.1964	0.3626	0.0445	3.821e-16
rs9271671	6	32625017		C	G	0.1783	0.3546	0.0578	8.675e-10
rs9271690	6	32625226		T	C	0.8215	-0.3645	0.0448	3.808e-16
rs4311504	6	32625572		C	G	0.8038	-0.3637	0.0446	3.368e-16
rs74291249	6	32626321		A	G	0.2031	0.2962	0.0409	4.471e-13
rs114527826	6	32626383		T	G	0.2228	0.3606	0.065	2.889e-08
rs9271790	6	32626998		A	G	0.1989	0.2977	0.0412	4.648e-13
rs9271860	6	32627501		T	C	0.142	0.5077	0.082	5.873e-10
rs9271895	6	32628129		T	C	0.7987	-0.3011	0.041	1.985e-13
rs9271903	6	32628261		C	G	0.7788	-0.3597	0.0655	3.896e-08
rs9271904	6	32628263		A	G	0.7788	-0.3597	0.0655	3.896e-08
rs74389316	6	32629092		T	C	0.2672	0.2247	0.0409	4.078e-08
rs6929044	6	32629174		T	C	0.8027	-0.3676	0.0445	1.512e-16
rs6929398	6	32629189		A	G	0.7978	-0.3007	0.0409	1.999e-13
rs9271958	6	32629595		A	G	0.2222	0.3606	0.065	2.895e-08
rs9272014	6	32630485		A	G	0.2658	0.2719	0.0408	2.587e-11
rs7758465	6	32631254		A	T	0.1943	0.304	0.0415	2.269e-13
rs7758472	6	32631262		A	G	0.2033	0.3424	0.0441	8.158e-15
rs9272052	6	32631378		A	G	0.8037	-0.3642	0.0446	3.02e-16
rs9272058	6	32631420		T	C	0.8157	-0.319	0.043	1.11e-13
rs9272060	6	32631460		A	G	0.1969	0.301	0.0412	2.662e-13
rs9272063	6	32631526		T	C	0.2099	0.2872	0.0405	1.276e-12
rs9272065	6	32631575		T	G	0.7964	-0.3422	0.0441	8.355e-15
rs9272066	6	32631597		A	C	0.2076	0.2882	0.0406	1.264e-12
rs9272123	6	32632796		T	C	0.2032	0.3461	0.0441	4.357e-15
rs79617990	6	32632917		A	G	0.3305	0.262	0.0382	6.726e-12
rs9272139	6	32632988		A	G	0.1463	0.499	0.0798	4.092e-10
rs78776954	6	32633040		T	G	0.7891	-0.2921	0.0405	5.191e-13
rs78240203	6	32633104		A	G	0.7884	-0.2919	0.0404	4.968e-13
rs9272188	6	32633911		C	G	0.7926	-0.3435	0.0441	6.303e-15
rs2395521	6	32633923		T	C	0.1869	0.3309	0.0575	8.737e-09
rs9281986	6	32633960		A	AG	0.8259	-0.4025	0.048	5.32e-17
rs9272202	6	32634108		T	C	0.153	0.4801	0.0789	1.139e-09
rs9272209	6	32634200		A	C	0.852	-0.4899	0.0794	6.992e-10
rs9272219	6	32634492		T	G	0.2697	0.2277	0.0374	1.142e-09
rs9272220	6	32634529		A	G	0.2056	0.3479	0.0439	2.457e-15
rs9272222	6	32634559		A	G	0.2657	0.2788	0.0407	7.625e-12
rs9272224	6	32634575		T	C	0.2658	0.2792	0.0407	7.026e-12
rs9272225	6	32634595		T	G	0.2689	0.2299	0.0375	8.384e-10
rs9272230	6	32634825		A	C	0.213	0.2933	0.0403	3.291e-13
rs9272233	6	32634909		A	G	0.2057	0.3473	0.0439	2.679e-15
rs9272234	6	32634914		A	G	0.2057	0.3473	0.0439	2.679e-15
rs2040410	6	32634921		T	C	0.1235	0.4687	0.0537	2.714e-18
rs9272236	6	32634925		T	C	0.7323	-0.2768	0.0407	9.979e-12
rs2040409	6	32634983		A	C	0.8765	-0.4686	0.0537	2.734e-18
rs9272238	6	32635000		T	C	0.2054	0.3463	0.044	3.399e-15
rs9272240	6	32635002		A	G	0.2054	0.3463	0.044	3.399e-15
rs9272241	6	32635010		A	G	0.2055	0.3464	0.044	3.274e-15
rs33939413	6	32635050		G	GCAGCCCCT	0.2056	0.3481	0.0439	2.362e-15
rs9272243	6	32635080		A	G	0.7943	-0.3474	0.0439	2.638e-15
rs9272244	6	32635083		T	G	0.2057	0.3474	0.0439	2.638e-15
rs9272246	6	32635126		C	G	0.2085	0.3438	0.0439	4.586e-15
rs9272247	6	32635147		A	G	0.2085	0.3435	0.0439	4.798e-15
rs9272248	6	32635164		A	G	0.2085	0.3436	0.0439	4.782e-15
rs9272249	6	32635175		A	T	0.2639	0.2791	0.0408	7.462e-12
rs9272250	6	32635181		A	T	0.7361	-0.2793	0.0408	7.288e-12
rs9272251	6	32635189		A	G	0.7361	-0.2793	0.0408	7.291e-12
rs2040406	6	32635230		A	G	0.792	-0.2714	0.0425	1.635e-10
rs9272253	6	32635251		T	G	0.2087	0.342	0.0438	6.032e-15
rs9272255	6	32635356		T	C	0.2681	0.2305	0.0375	7.857e-10
rs9272256	6	32635392		T	C	0.7945	-0.3483	0.044	2.298e-15
rs9272258	6	32635414		T	G	0.2656	0.2797	0.0408	7.225e-12
rs9272259	6	32635415		A	G	0.7343	-0.2795	0.0408	7.322e-12
rs9272260	6	32635459		A	T	0.2053	0.3489	0.044	2.134e-15
rs9272261	6	32635465		A	G	0.2664	0.2301	0.0376	9.29e-10
rs9272262	6	32635514		A	T	0.7942	-0.3467	0.0439	2.889e-15
rs9272263	6	32635518		A	G	0.2169	0.2894	0.0402	5.845e-13
rs9272264	6	32635532		A	G	0.7942	-0.3467	0.0439	2.902e-15
rs150097334	6	32635637		T	TG	0.2056	0.3491	0.044	2.115e-15
rs115787103	6	32635640		A	T	0.2056	0.3491	0.044	2.115e-15
	6	32635676		T	C	0.8216	-0.3517	0.0609	7.778e-09
	6	32635677		A	G	0.1784	0.3517	0.0609	7.778e-09
rs115852844	6	32635679		A	G	0.2055	0.3489	0.044	2.164e-15
rs3104367	6	32635710		T	C	0.4371	-0.2424	0.0368	4.663e-11
rs9272271	6	32635749		A	T	0.7345	-0.2327	0.0377	6.971e-10
rs9272272	6	32635753		A	G	0.2664	0.2729	0.0408	2.28e-11
	6	32635762		CAATCCACTGTGCTCACAG	C	0.1785	0.3506	0.061	8.924e-09
rs9272273	6	32635806		A	G	0.7435	-0.2429	0.0386	3.164e-10
rs9272274	6	32635822		T	C	0.266	0.2732	0.0408	2.161e-11
rs9272275	6	32635826		T	C	0.2001	0.2912	0.0414	2.111e-12
rs9272276	6	32635857		C	G	0.2581	0.2409	0.0386	4.527e-10
rs9272277	6	32635864		C	G	0.2674	0.2739	0.0407	1.654e-11
rs9272278	6	32635879		C	G	0.768	-0.3109	0.0421	1.576e-13
rs9272279	6	32635881		T	C	0.7945	-0.3465	0.044	3.171e-15
rs9272293	6	32635965		A	G	0.4683	-0.2154	0.0339	2.171e-10
rs9272294	6	32635983		T	C	0.2067	0.2917	0.0407	8.037e-13
	6	32636033		A	T	0.8214	-0.3499	0.0608	8.851e-09
rs9272297	6	32636034		C	G	0.2633	0.2794	0.0411	1.1e-11
rs9272298	6	32636035		T	C	0.2633	0.2794	0.0411	1.1e-11
	6	32636060		T	C	0.1875	0.3278	0.0437	6.391e-14
	6	32636070		A	G	0.8215	-0.3505	0.0608	8.397e-09
rs9272302	6	32636077		T	C	0.234	0.3026	0.0423	8.633e-13
	6	32636088		A	AC	0.1784	0.3508	0.0609	8.271e-09
	6	32636101		T	C	0.1785	0.3503	0.0609	8.557e-09
rs9272307	6	32636109		T	G	0.2634	0.2807	0.0411	8.382e-12
	6	32636129		T	C	0.806	-0.3053	0.043	1.326e-12
rs9272309	6	32636159		A	G	0.6894	-0.2232	0.0361	6.695e-10
rs9272310	6	32636162		T	G	0.3638	0.2392	0.0376	2.066e-10
rs9272311	6	32636176		A	G	0.2052	0.2946	0.0407	4.59e-13
rs3104364	6	32636191		A	G	0.4378	-0.2422	0.0369	5.284e-11
rs3104363	6	32636223		T	G	0.5626	0.242	0.0369	5.327e-11
rs9272320	6	32636347		A	G	0.5006	0.2481	0.0366	1.253e-11
rs9272321	6	32636350		T	C	0.204	0.3445	0.0443	7.238e-15
rs9272322	6	32636351		T	G	0.796	-0.3445	0.0443	7.217e-15
rs9272324	6	32636375		A	G	0.4981	-0.1985	0.0329	1.681e-09
rs9272325	6	32636379		A	G	0.2638	0.2775	0.0411	1.476e-11
rs9272326	6	32636392		T	C	0.1934	0.2854	0.0422	1.427e-11
rs9272330	6	32636436		A	C	0.5976	0.2267	0.0376	1.568e-09
rs6910310	6	32636444		A	G	0.8784	-0.4733	0.055	7.937e-18
rs9272339	6	32636497		A	G	0.286	-0.2309	0.0415	2.662e-08
rs9272343	6	32636549		A	G	0.7675	-0.351	0.0641	4.374e-08
rs9272352	6	32636677		C	G	0.7227	-0.2731	0.0405	1.496e-11
	6	32636739		T	C	0.1783	0.3517	0.061	8.186e-09
rs6933289	6	32636774		T	C	0.1803	0.4153	0.0741	2.106e-08
rs9272405	6	32637142		T	C	0.7688	-0.3578	0.0645	2.882e-08
rs9272423	6	32637387		T	G	0.7638	-0.3506	0.0637	3.719e-08
rs3207966	6	32637420		A	G	0.236	0.3497	0.0637	4.11e-08
rs1047985	6	32637439		A	G	0.2359	0.3517	0.0638	3.452e-08
rs9272434	6	32637548		T	C	0.2361	0.351	0.0637	3.648e-08
rs9272445	6	32637643		T	C	0.1326	0.5169	0.0909	1.278e-08
rs7771972	6	32637780		T	C	0.2357	0.3516	0.0637	3.47e-08
rs9272480	6	32638023		A	G	0.7644	-0.3523	0.0638	3.299e-08
rs2187668	6	32638107		T	C	0.1428	0.452	0.0714	2.484e-10
rs78045276	6	32638158		T	G	0.146	0.4922	0.0796	6.159e-10
rs9272495	6	32638356		A	C	0.2363	0.3496	0.0638	4.157e-08
rs7763805	6	32639477		A	G	0.1485	0.4857	0.0798	1.14e-09
rs2284189	6	32639619		T	C	0.8515	-0.4944	0.0796	5.189e-10
rs9272632	6	32640403		A	G	0.7536	-0.3477	0.0633	3.954e-08
rs17843560	6	32641611		T	G	0.1218	0.5625	0.097	6.625e-09
rs9272729	6	32641817		A	G	0.149	0.4936	0.0794	5.136e-10
rs9272770	6	32642449		A	G	0.1703	0.407	0.0738	3.47e-08
rs201117812	6	32642509		A	G	0.1567	0.4189	0.0758	3.22e-08
rs1048381	6	32642668		A	G	0.171	0.4091	0.0736	2.753e-08
rs540435913	6	32643323		A	G	0.1165	0.6129	0.1009	1.245e-09
rs707945	6	32643324		T	G	0.8835	-0.6129	0.1009	1.245e-09
	6	32643419		A	ATGT	0.1048	0.4515	0.0729	5.944e-10
rs9272972	6	32643532		T	C	0.2955	0.2495	0.0406	8.096e-10
rs149654721	6	32643732		T	C	0.4403	-0.2424	0.0369	5.337e-11
rs116685323	6	32643733		C	G	0.5603	0.2427	0.037	5.117e-11
rs76804881	6	32643750		A	T	0.7171	-0.2536	0.0405	3.761e-10
rs77484723	6	32643754		T	C	0.7171	-0.2536	0.0405	3.737e-10
rs9273011	6	32643834		T	C	0.732	-0.2741	0.0407	1.555e-11
rs9273012	6	32643864		A	G	0.7399	-0.2314	0.0382	1.394e-09
rs9273013	6	32643872		T	C	0.5621	0.2414	0.0369	6.109e-11
	6	32643885		T	C	0.249	0.2727	0.0415	4.977e-11
	6	32643886		A	G	0.7565	-0.2547	0.0422	1.597e-09
rs9273020	6	32643946		T	G	0.5609	0.2423	0.0369	5.308e-11
rs9273021	6	32643948		A	G	0.4388	-0.242	0.0369	5.477e-11
rs9273024	6	32643980		T	C	0.4397	-0.2429	0.037	5.246e-11
rs9273027	6	32644006		A	G	0.4388	-0.2438	0.037	4.199e-11
rs9273030	6	32644028		A	T	0.5613	0.2431	0.0369	4.744e-11
rs9273033	6	32644096		T	C	0.4388	-0.244	0.0369	3.804e-11
rs9273034	6	32644097		T	G	0.5613	0.2441	0.0369	3.723e-11
rs9273035	6	32644109		A	G	0.2866	0.2551	0.0405	3.126e-10
rs9273037	6	32644135		A	G	0.2868	0.2553	0.0405	2.887e-10
rs9273038	6	32644154		A	T	0.4381	-0.2432	0.0369	4.464e-11
rs9273039	6	32644174		T	C	0.2871	0.2557	0.0405	2.835e-10
rs9273041	6	32644186		A	T	0.2874	0.2552	0.0406	3.114e-10
rs9273043	6	32644191		T	G	0.5614	0.2432	0.0369	4.605e-11
rs9273046	6	32644226		T	C	0.5594	0.2444	0.0371	4.341e-11
rs9273047	6	32644229		T	C	0.2875	0.2569	0.0409	3.36e-10
rs9273053	6	32644273		A	T	0.4405	-0.2442	0.0371	4.366e-11
rs9273054	6	32644302		T	C	0.6857	-0.2421	0.0405	2.187e-09
rs9273055	6	32644311		T	G	0.3143	0.242	0.0405	2.227e-09
rs9273056	6	32644320		T	G	0.4401	-0.2439	0.037	4.597e-11
rs9273060	6	32644337		A	G	0.6217	-0.2259	0.0367	7.596e-10
rs9273064	6	32644425		A	G	0.6979	-0.2681	0.0406	4.092e-11
rs9273065	6	32644428		T	G	0.4399	-0.2436	0.0371	5.069e-11
rs9273066	6	32644431		A	G	0.56	0.2436	0.0371	5.14e-11
rs9273069	6	32644456		T	C	0.5589	0.2445	0.0371	4.358e-11
rs9273072	6	32644488		A	C	0.3045	0.267	0.0406	4.759e-11
rs9273074	6	32644510		A	G	0.4411	-0.2446	0.0371	4.302e-11
rs9273075	6	32644511		A	G	0.4411	-0.2446	0.0371	4.302e-11
rs9273077	6	32644530		A	G	0.5767	-0.1909	0.0343	2.562e-08
rs9273080	6	32644556		T	C	0.2904	0.2719	0.041	3.475e-11
rs9273081	6	32644559		A	G	0.5127	0.2109	0.0358	3.64e-09
rs9273083	6	32644566		T	C	0.5003	-0.2488	0.0355	2.568e-12
rs9273145	6	32645175		A	T	0.2823	0.2833	0.0413	7.231e-12
rs9273146	6	32645202		A	T	0.439	-0.2441	0.0371	4.888e-11
rs9273147	6	32645204		A	G	0.439	-0.2441	0.0371	4.874e-11
rs9273150	6	32645233		T	C	0.7394	-0.2552	0.0394	9.279e-11
rs9273151	6	32645234		A	G	0.2719	0.258	0.039	3.878e-11
rs9273152	6	32645248		A	C	0.7005	-0.2768	0.041	1.426e-11
rs6932167	6	32645249		A	G	0.1111	0.4971	0.0579	9.455e-18
rs9273156	6	32645273		A	G	0.5601	0.2446	0.0372	4.659e-11
rs9273158	6	32645285		C	G	0.5601	0.2448	0.0372	4.433e-11
	6	32647349		A	G	0.6723	-0.3779	0.0677	2.333e-08
rs17612555	6	32647589		A	G	0.5615	0.2538	0.0384	3.768e-11
rs17843573	6	32647623		T	C	0.559	0.2158	0.0358	1.597e-09
rs7745002	6	32647644		A	G	0.5419	-0.2009	0.0347	6.828e-09
rs17843575	6	32647650		T	C	0.5458	0.221	0.0359	7.409e-10
rs17843576	6	32647654		A	G	0.5609	0.2529	0.0382	3.78e-11
rs17612576	6	32647681		A	G	0.5421	0.2154	0.0366	3.843e-09
rs17843577	6	32647733		T	C	0.5504	0.2209	0.0359	7.91e-10
rs17843578	6	32647743		A	G	0.5615	0.2532	0.0383	3.883e-11
rs17843579	6	32647750		T	G	0.4489	-0.213	0.0348	9.377e-10
rs17843580	6	32647774		A	G	0.5119	-0.2067	0.0299	4.435e-12
rs17612590	6	32647801		A	G	0.5316	0.2111	0.0364	6.86e-09
rs17612597	6	32647805		A	C	0.4388	-0.2524	0.0383	4.242e-11
rs17612604	6	32647820		A	C	0.4389	-0.2527	0.0383	4.098e-11
rs17612610	6	32647834		A	T	0.4393	-0.2528	0.0383	3.864e-11
rs17612617	6	32647836		T	G	0.5607	0.2528	0.0383	3.864e-11
rs17843581	6	32647861		A	C	0.4391	-0.253	0.0382	3.683e-11
rs17843582	6	32647874		A	G	0.5609	0.2528	0.0382	3.806e-11
rs17843583	6	32647875		A	C	0.4579	-0.2045	0.0364	1.955e-08
rs17843584	6	32647891		T	G	0.5613	0.2537	0.0383	3.558e-11
rs17612625	6	32647925		A	C	0.4387	-0.2144	0.0357	1.889e-09
rs17612633	6	32647933		C	G	0.5615	0.2141	0.0357	1.998e-09
rs17612640	6	32647977		A	G	0.5613	0.2532	0.0383	3.931e-11
	6	32648016		G	GAACA	0.4766	-0.2848	0.0506	1.835e-08
rs17843586	6	32648024		A	G	0.4392	-0.2519	0.0384	5.131e-11
rs17843587	6	32648025		T	C	0.5609	0.2515	0.0384	5.434e-11
	6	32648035		T	TTG	0.4773	-0.2865	0.0507	1.559e-08
rs17612661	6	32648037		A	ACG	0.5238	0.286	0.0506	1.547e-08
rs17843604	6	32652506		T	C	0.4921	0.2239	0.0348	1.23e-10
rs12527758	6	32652509		T	C	0.514	-0.2196	0.035	3.576e-10
rs17612781	6	32652534		T	C	0.3994	-0.1867	0.0327	1.099e-08
rs17612788	6	32652567		A	G	0.55	0.2006	0.035	9.771e-09
	6	32652570		CT	C	0.5238	0.2842	0.0506	1.942e-08
	6	32652572		A	T	0.4764	-0.2847	0.0506	1.853e-08
rs17612802	6	32652582		T	C	0.5501	0.1986	0.035	1.386e-08
	6	32652913		A	G	0.1042	0.4489	0.0728	6.876e-10
rs9273320	6	32655295		A	G	0.4415	-0.2385	0.0371	1.252e-10
rs9273321	6	32655319		A	G	0.4416	-0.2383	0.0371	1.291e-10
	6	32655323		CTCT	C	0.5243	0.2852	0.0505	1.674e-08
	6	32655325		C	G	0.5243	0.2852	0.0505	1.674e-08
rs3021302	6	32655373		T	C	0.8176	-0.3019	0.0443	9.549e-12
rs9273324	6	32655379		T	C	0.4206	0.2229	0.0404	3.449e-08
rs9273326	6	32655442		T	C	0.4376	-0.1988	0.0341	5.82e-09
rs2395228	6	32655446		A	C	0.862	-0.4672	0.075	4.601e-10
rs9273328	6	32655456		A	G	0.5626	0.2422	0.0368	4.85e-11
rs9273329	6	32655465		A	G	0.5621	0.1994	0.0342	5.245e-09
rs9273330	6	32655523		T	C	0.5493	0.2073	0.0347	2.351e-09
rs9273331	6	32655530		T	C	0.5599	0.2384	0.037	1.142e-10
rs9273332	6	32655540		A	T	0.4401	-0.2392	0.037	9.956e-11
rs9273333	6	32655548		T	C	0.4404	-0.2376	0.037	1.341e-10
rs549470361	6	32655564		CT	C	0.5242	0.2827	0.0506	2.239e-08
	6	32655565		G	GA	0.4758	-0.2827	0.0506	2.239e-08
rs9273335	6	32655571		A	G	0.4954	-0.2332	0.0354	4.594e-11
rs9273337	6	32655600		T	C	0.5589	0.2369	0.037	1.593e-10
rs9273338	6	32655616		A	T	0.516	-0.2475	0.0358	4.883e-12
rs9273339	6	32655653		A	G	0.5382	0.2012	0.0348	7.383e-09
rs9273343	6	32655668		T	C	0.4907	-0.1924	0.0352	4.548e-08
rs727939	6	32655686		A	G	0.5828	-0.2566	0.0373	6.107e-12
rs9273363	6	32658495		A	C	0.2855	0.2935	0.036	3.593e-16
rs9273364	6	32658525		T	G	0.7145	-0.2937	0.036	3.473e-16
rs9273367	6	32658661		A	T	0.7106	-0.3208	0.0392	2.549e-16
rs9273368	6	32658698		A	G	0.2855	0.2931	0.036	4.114e-16
rs9273369	6	32658707		T	C	0.8786	-0.4684	0.0542	5.821e-18
rs9273370	6	32658715		A	G	0.5439	0.205	0.0371	3.34e-08
rs9273372	6	32658813		C	G	0.4374	-0.2431	0.0368	4.095e-11
rs9273373	6	32658824		A	G	0.4374	-0.2431	0.0368	4.092e-11
rs9273374	6	32658837		A	G	0.4374	-0.2428	0.0368	4.337e-11
rs9273396	6	32659328		A	T	0.5593	0.2408	0.037	7.712e-11
rs9273397	6	32659332		A	G	0.4405	-0.2427	0.037	5.414e-11
rs9273398	6	32659338		T	G	0.5595	0.2426	0.037	5.491e-11
rs9273399	6	32659340		A	C	0.5593	0.2435	0.037	4.734e-11
rs9273400	6	32659351		T	C	0.4585	0.2178	0.0353	6.471e-10
rs9273418	6	32659585		A	C	0.4394	-0.2435	0.0369	4.366e-11
rs1130457	6	32659590		T	C	0.2527	-0.2455	0.0434	1.592e-08
rs1130456	6	32659602		T	C	0.2527	-0.2452	0.0434	1.665e-08
rs9273423	6	32659613		T	C	0.2499	-0.2455	0.0436	1.786e-08
rs9273425	6	32659619		T	C	0.5612	0.2429	0.0369	4.717e-11
rs9273427	6	32659664		A	C	0.4384	-0.2432	0.0369	4.207e-11
rs9273429	6	32659679		A	G	0.6861	0.2288	0.0405	1.59e-08
rs1064173	6	32659703		A	G	0.2657	0.3539	0.054	5.661e-11
rs9273436	6	32659740		T	G	0.4992	-0.225	0.0354	1.995e-10
rs9273438	6	32659746		A	G	0.4723	-0.2553	0.0367	3.405e-12
rs28724234	6	32659758		T	G	0.5591	0.2397	0.037	9.059e-11
rs9273441	6	32659796		C	G	0.4388	-0.2434	0.0369	4.232e-11
rs9273442	6	32659805		T	G	0.2496	-0.2468	0.0435	1.419e-08
rs9273443	6	32659823		T	G	0.562	0.243	0.0369	4.286e-11
rs9273444	6	32659858		T	G	0.4377	-0.2433	0.0368	4.027e-11
rs9273445	6	32659869		A	G	0.4377	-0.2434	0.0368	3.907e-11
rs1063355	6	32659937		T	G	0.4324	-0.1888	0.0337	2.025e-08
rs9273453	6	32660035		C	G	0.8695	-0.463	0.0796	5.867e-09
rs9273495	6	32660496		A	G	0.4254	0.294	0.0529	2.669e-08
rs2854275	6	32660651		A	C	0.1398	0.4421	0.0724	1.049e-09
rs9273736	6	32661594		A	G	0.7795	-0.3802	0.0684	2.713e-08
rs531218774	6	32661595		A	G	0.2205	0.3802	0.0684	2.707e-08
rs9273873	6	32661873		T	C	0.8017	-0.2904	0.0417	3.255e-12
	6	32663145		A	T	0.1452	0.3733	0.0655	1.229e-08
	6	32663151		A	C	0.1452	0.3731	0.0655	1.256e-08
rs281863466	6	32663219		T	C	0.2156	0.2891	0.0451	1.464e-10
rs281863431	6	32663261		A	G	0.785	-0.2927	0.0451	8.707e-11
rs281863430	6	32663262		A	G	0.2495	-0.2455	0.0435	1.718e-08
	6	32663280		T	C	0.8585	-0.3803	0.0656	6.856e-09
	6	32663288		T	C	0.1415	0.3809	0.0656	6.536e-09
rs58770498	6	32663309		A	G	0.1377	0.3298	0.059	2.213e-08
	6	32663566		T	C	0.8571	-0.3842	0.0658	5.235e-09
	6	32663571		A	G	0.1368	0.3651	0.0626	5.398e-09
	6	32663612		G	GCCTACA	0.8615	-0.3796	0.0671	1.547e-08
rs281874828	6	32663641		A	G	0.8297	-0.3296	0.0459	6.659e-13
rs281874821	6	32663649		A	G	0.1729	0.3119	0.0454	6.657e-12
rs9274497	6	32666151		A	G	0.1986	0.3326	0.0453	2.011e-13
rs9274498	6	32666164		A	G	0.5931	-0.2151	0.0356	1.564e-09
rs9274503	6	32666326		T	C	0.4365	-0.2418	0.037	6.363e-11
rs9274504	6	32666334		T	C	0.338	0.2126	0.0389	4.512e-08
rs9274505	6	32666349		A	G	0.1757	0.3096	0.0448	4.699e-12
rs9274506	6	32666364		T	C	0.431	-0.2425	0.0366	3.317e-11
rs9274510	6	32666407		A	G	0.4368	-0.2385	0.037	1.194e-10
rs9274514	6	32666466		A	G	0.2022	0.2847	0.0413	5.414e-12
	6	32666529		A	T	0.4754	-0.2838	0.0506	1.991e-08
rs3891176	6	32666541		A	C	0.1863	0.3089	0.0426	4.172e-13
rs1049057	6	32666573		T	C	0.4345	-0.2409	0.0369	6.963e-11
	6	32666625		A	AAGC	0.1419	0.3793	0.0655	7.171e-09
rs3891175	6	32666690		T	C	0.1975	0.3009	0.0417	5.089e-13
rs9274526	6	32666708		A	C	0.2487	-0.2441	0.0437	2.321e-08
rs9274528	6	32666731		T	C	0.7789	0.2196	0.0381	8.583e-09
rs9274529	6	32666737		A	G	0.4383	-0.2423	0.0369	5.182e-11
	6	32666807		C	G	0.8485	-0.4141	0.0484	1.193e-17
	6	32666836		T	C	0.1348	0.3812	0.0629	1.347e-09
rs4403294	6	32667145		A	G	0.2485	-0.2449	0.0437	2.046e-08
rs4988889	6	32667175		T	G	0.2003	0.296	0.0414	8.669e-13
rs9274561	6	32667176		A	G	0.4344	-0.242	0.0369	5.631e-11
rs9274564	6	32667271		A	G	0.5645	0.2399	0.037	8.572e-11
rs9274565	6	32667290		A	T	0.5605	0.2428	0.0369	4.723e-11
	6	32667293		A	T	0.4826	0.3092	0.0499	5.832e-10
rs4311549	6	32667314		T	G	0.2489	-0.2431	0.0437	2.566e-08
rs4988888	6	32667420		T	C	0.8017	-0.3333	0.0451	1.411e-13
rs9274573	6	32667428		T	C	0.5636	0.2418	0.0369	5.754e-11
rs9274575	6	32667449		T	G	0.4363	-0.2423	0.0369	5.129e-11
rs77296290	6	32667519		T	C	0.1848	0.373	0.0625	2.396e-09
rs3828790	6	32668032		T	C	0.4347	-0.1911	0.0338	1.622e-08
rs3828791	6	32668036		A	G	0.4369	-0.2421	0.0368	4.746e-11
rs9274623	6	32668221		T	G	0.1949	0.3105	0.042	1.452e-13
rs3828798	6	32668261		A	T	0.437	-0.2425	0.0368	4.425e-11
rs9274626	6	32668263		T	C	0.2881	-0.2231	0.0385	7.082e-09
rs3828806	6	32668353		T	C	0.5653	0.2423	0.0368	4.849e-11
rs3828807	6	32668354		C	G	0.5653	0.2423	0.0368	4.849e-11
rs9274637	6	32668360		A	G	0.2496	-0.2481	0.0434	1.102e-08
rs3828811	6	32668444		T	G	0.4339	-0.2419	0.0369	5.461e-11
rs9274660	6	32668657		A	G	0.4323	-0.191	0.0337	1.387e-08
rs9274662	6	32668717		T	C	0.4088	-0.2517	0.0374	1.628e-11
rs9274669	6	32668814		A	G	0.4261	-0.2501	0.037	1.39e-11
rs9274671	6	32668825		C	G	0.1218	0.4656	0.0543	9.378e-18
rs3134998	6	32668980		T	C	0.4047	-0.2192	0.0342	1.539e-10
rs3134996	6	32669089		A	T	0.4009	-0.2123	0.0341	5.017e-10
rs2395231	6	32669525		A	G	0.1092	0.4899	0.0569	7.293e-18
rs3134993	6	32670001		A	G	0.5661	0.2418	0.0369	5.587e-11
rs3129782	6	32680942		A	G	0.715	0.225	0.0385	5.235e-09
rs3134979	6	32682401		A	T	0.2491	-0.2481	0.0435	1.16e-08
	6	32683652		CA	C	0.8991	-0.4427	0.0739	2.076e-09
rs3134978	6	32683700		A	T	0.8785	-0.4459	0.0515	4.675e-18
rs3134977	6	32683864		T	G	0.1217	0.447	0.0515	3.869e-18
rs3134971	6	32686372		A	C	0.8771	-0.4621	0.0542	1.444e-17
rs3134970	6	32686425		T	C	0.2489	-0.2488	0.0435	1.09e-08
rs3129716	6	32689659		T	C	0.8785	-0.4457	0.0515	4.757e-18
rs3129717	6	32691531		T	C	0.2483	-0.2551	0.0437	5.481e-09
rs3134967	6	32691538		A	G	0.2482	-0.2549	0.0438	5.749e-09
rs2647004	6	32691832		T	C	0.652	-0.224	0.0379	3.304e-09
rs2856674	6	32691868		A	G	0.878	-0.4458	0.0514	3.949e-18
rs1794520	6	32694561		A	T	0.1488	0.4882	0.0799	9.705e-10
rs1794519	6	32694696		A	C	0.8771	-0.4644	0.0542	1.12e-17
rs2647019	6	32695578		C	G	0.1214	0.446	0.0515	4.546e-18
rs1794283	6	32698581		T	C	0.1215	0.446	0.0515	4.64e-18
rs1794282	6	32698749		T	C	0.1416	0.2922	0.0523	2.233e-08
rs1794280	6	32699394		A	T	0.8783	-0.4455	0.0515	4.843e-18
rs1794279	6	32699818		T	G	0.1224	0.5162	0.0794	8.142e-11
rs1794277	6	32700886		A	G	0.1211	0.4473	0.0516	4.528e-18
rs1613056	6	32701169		T	C	0.1212	0.4469	0.0516	4.381e-18
rs1794511	6	32703430		T	G	0.8789	-0.4473	0.0516	4.287e-18
rs1794530	6	32704023		T	G	0.8786	-0.448	0.0516	3.642e-18
rs1794274	6	32704266		T	G	0.145	0.4915	0.0801	8.367e-10
rs1794272	6	32704439		A	T	0.8599	-0.4514	0.072	3.652e-10
rs1794528	6	32704662		T	C	0.8598	-0.4514	0.072	3.648e-10
rs1617322	6	32706116		A	C	0.1209	0.4475	0.0516	4.247e-18
rs1794269	6	32706117		T	C	0.4543	0.2288	0.0367	4.378e-10
rs3134969	6	32706250		C	G	0.2157	-0.2787	0.0463	1.741e-09
rs3134968	6	32706282		A	G	0.2304	-0.2695	0.0453	2.717e-09
rs3134966	6	32706521		T	C	0.2456	-0.2511	0.044	1.187e-08
rs9275576	6	32711549		T	C	0.1203	0.4535	0.0516	1.487e-18
rs3957147	6	32714358		T	C	0.2048	0.2863	0.0423	1.248e-11
rs9275601	6	32714887		T	C	0.3996	0.1942	0.0334	6.039e-09
rs1383264	6	32772190		A	T	0.4066	0.1941	0.033	3.951e-09
rs9276625	6	32775967		A	G	0.1036	0.4353	0.0539	6.778e-16
rs4947258	6	32779725		A	G	0.8963	-0.4354	0.0538	5.802e-16
rs4947349	6	32780013		T	G	0.1037	0.4353	0.0538	5.871e-16
rs9276688	6	32783467		T	C	0.1037	0.4354	0.0538	5.809e-16
rs9276689	6	32784185		T	C	0.1041	0.4294	0.0537	1.237e-15
rs719655	6	32784556		T	C	0.1037	0.4354	0.0538	5.83e-16
rs9276691	6	32785067		A	G	0.8963	-0.4354	0.0538	5.819e-16
rs7762279	6	32787513		T	C	0.8963	-0.4352	0.0538	5.979e-16
rs9276700	6	32788876		T	C	0.1037	0.4354	0.0538	5.835e-16
rs9276710	6	32789325		T	C	0.7992	-0.2395	0.0408	4.396e-09
rs9280183	6	32795145		CTG	C	0.8956	-0.4715	0.057	1.281e-16
rs9276731	6	32797808		T	G	0.1036	0.4325	0.0538	9.429e-16
rs4947350	6	32799843		T	C	0.7985	-0.2448	0.0407	1.74e-09
rs6912056	6	32806497		A	G	0.2014	0.2448	0.0407	1.762e-09
rs9276772	6	32806514		C	G	0.8963	-0.4348	0.0538	6.175e-16
rs4513843	6	32808813		C	G	0.2013	0.2434	0.0407	2.17e-09
rs1054684	6	32809144		T	C	0.899	-0.4625	0.0547	2.717e-17
rs11244	6	32812947		A	G	0.2751	0.2031	0.036	1.637e-08
rs7383287	6	32815309		A	G	0.8021	-0.2268	0.0401	1.589e-08
rs60045856	6	32832068		T	G	0.8947	-0.4128	0.0531	8.012e-15
rs62397687	6	32834232		T	C	0.2005	0.2735	0.0405	1.463e-11
rs143970236	6	32834935		T	TTTG	0.1059	0.4424	0.0567	6.029e-15
rs114595701	6	32839713		T	C	0.0882	0.435	0.0576	4.437e-14
rs45506201	6	32840522		A	G	0.0882	0.4344	0.0576	4.668e-14
rs116827595	6	32845991		A	G	0.0882	0.4314	0.0576	7.021e-14
rs115591082	6	32876326		A	G	0.9121	-0.4267	0.0576	1.311e-13
rs72860374	6	32895181		C	G	0.9117	-0.4254	0.0574	1.245e-13
rs56098412	6	32911694		A	G	0.9121	-0.424	0.0576	1.744e-13
rs77318243	6	32936262		A	T	0.0808	0.3405	0.0589	7.356e-09
rs75301392	6	32936274		T	C	0.0808	0.3404	0.0589	7.395e-09
rs1480380	6	32945469		T	C	0.0872	0.3405	0.0566	1.797e-09
rs73396800	6	32946949		C	G	0.0782	0.3547	0.0596	2.595e-09
rs73396802	6	32948020		T	C	0.0782	0.3547	0.0596	2.607e-09
rs57651384	6	32956072		A	G	0.0783	0.3528	0.0595	3.078e-09
rs9276931	6	32961207		A	G	0.9053	-0.3379	0.0547	6.326e-10
rs116131925	6	32962166		A	T	0.9218	-0.3488	0.0595	4.676e-09
rs58173627	6	32962349		A	G	0.0783	0.3529	0.0595	3.056e-09
rs9276933	6	32963018		T	C	0.8982	-0.3043	0.0529	8.994e-09
rs59576053	6	32968343		T	C	0.0782	0.3546	0.0596	2.603e-09
rs73409626	6	32975630		A	T	0.9217	-0.3537	0.0595	2.818e-09
rs73409631	6	32977689		A	G	0.9218	-0.3562	0.0595	2.172e-09
rs76088152	6	32978545		A	G	0.0842	0.3224	0.0581	2.913e-08
rs73409636	6	32978734		A	G	0.0782	0.3532	0.0596	3.127e-09
rs532089382	6	32978829		CAG	C	0.9065	-0.3743	0.0601	4.82e-10
rs151013983	6	32978847		CT	C	0.917	-0.3814	0.0636	2.044e-09
rs73409643	6	32981452		T	C	0.0782	0.3534	0.0596	3.06e-09
rs111234931	6	32982862		T	C	0.0782	0.3533	0.0596	3.074e-09
rs113070636	6	32983120		A	C	0.0782	0.3534	0.0596	3.057e-09
rs143522819	6	32983125		T	TAGC	0.0794	0.3944	0.064	7.217e-10
rs112935194	6	32990120		T	C	0.9217	-0.3511	0.0596	3.871e-09
rs57331574	6	32993414		T	C	0.9218	-0.3538	0.0596	2.883e-09
rs113913737	6	32994353		T	C	0.0781	0.3542	0.0596	2.827e-09
rs73409691	6	32996171		T	G	0.0771	0.3502	0.0605	7.069e-09
-	8	1229690	DLGAP2	C	G	0.9863	-0.7872	0.1408	2.25e-08
-	8	1231714	DLGAP2	A	G	0.0137	0.7844	0.1408	2.519e-08
-	8	1232190	DLGAP2	A	G	0.0137	0.7844	0.1408	2.537e-08
-	8	1233110	DLGAP2	C	G	0.0136	0.7829	0.1411	2.888e-08
-	8	1233501	DLGAP2	A	G	0.0135	0.789	0.1412	2.316e-08
-	8	1233555	DLGAP2	T	C	0.0135	0.789	0.1412	2.316e-08
-	8	1235439	DLGAP2	T	G	0.9864	-0.7774	0.1409	3.443e-08
-	8	1236478	DLGAP2	T	C	0.9864	-0.7778	0.1408	3.343e-08
-	8	1237099	DLGAP2	C	G	0.0131	0.8005	0.1439	2.638e-08
-	8	1237670	DLGAP2	T	C	0.9846	-0.7257	0.1329	4.752e-08
-	8	1238477	DLGAP2	T	C	0.9851	-0.7883	0.1363	7.322e-09
-	8	1238842	DLGAP2	A	C	0.9837	-0.7294	0.1299	1.987e-08
-	8	1239342	DLGAP2	A	G	0.9837	-0.729	0.1299	1.996e-08
-	8	1239617	DLGAP2	A	G	0.0163	0.7294	0.1299	1.987e-08
-	8	1239637	DLGAP2	T	C	0.0163	0.7296	0.1299	1.962e-08
-	8	1239638	DLGAP2	A	G	0.9837	-0.7296	0.1299	1.942e-08
rs187354747	8	123216467	FAM83A/C8orf76	A	T	0.9888	-3.3933	0.6095	2.592e-08
-	10	122232187	TACC2	A	G	0.0879	0.3783	0.0687	3.579e-08
rs138765886	11	48494767	OR4A47	A	G	0.0197	1.2277	0.2189	2.054e-08
rs139128886	11	48555288	OR4A47	T	C	0.9808	-1.6101	0.2664	1.499e-09
rs139132726	17	57566488	MSI2	T	C	0.0102	5.1467	0.8412	9.466e-10
rs4024168	19	22718775	ZNF99	A	G	0.9853	-4.9455	0.7432	2.841e-11
	19	34868591		A	G	0.0118	0.9383	0.1699	3.314e-08
rs561270260	19	34896411	ZNF30	C	G	0.0112	0.9896	0.1714	7.692e-09
rs186728968	19	34972186	ZNF792	A	G	0.0121	0.9488	0.1691	2.007e-08
rs4806131	19	35349139		C	G	0.9858	-1.1294	0.1461	1.057e-14
rs76815147	19	35352801		T	C	0.9858	-1.137	0.1463	7.582e-15
	19	35358981		C	G	0.9643	-0.6718	0.1115	1.667e-09
rs148082328	19	35417556	FFAR2	T	G	0.0183	0.67	0.1096	9.82e-10
rs191952100	19	35574451	PMIS2	A	G	0.0173	0.9565	0.142	1.627e-11
rs560825510	19	35632109	RBM42	A	G	0.0165	1.0204	0.1428	8.905e-13
rs540820582	19	35656761	COX6B1	A	G	0.0179	1.0623	0.1353	4.097e-15
rs185168306	19	35717656	KMT2B	A	G	0.0329	0.4738	0.083	1.152e-08
rs576281259	19	35775168	ARHGAP33	T	C	0.0179	1.0605	0.1355	5.07e-15
rs4805141	19	35831567	NPHS1	T	C	0.0201	0.7196	0.1027	2.457e-12
rs62109662	19	35833563	NPHS1	A	G	0.02	0.7252	0.1031	1.98e-12
rs372598043	19	35945880	LRFN3	T	G	0.0181	1.1739	0.1287	7.347e-20
rs4806237	19	35948396	LRFN3	A	G	0.2648	0.2074	0.0356	5.399e-09
rs150272170	19	35972253	LRFN3	A	G	0.9771	-1.0794	0.1193	1.493e-19
rs45471297	19	36115262	TBCB	C	G	0.9699	-0.575	0.0943	1.086e-09
rs17885114	19	36145689	CAPNS1	C	G	0.9685	-0.87	0.1098	2.262e-15
rs570089820	19	36443746	ZNF566	T	C	0.0294	0.8645	0.113	1.995e-14
rs1043138044	19	36468247	ZNF566	A	C	0.9856	-1.3776	0.1335	5.951e-25
rs34676748	19	36779669	ZNF850	A	G	0.0488	0.5542	0.0989	2.079e-08
rs12973920	19	36884943	ZNF345	C	G	0.9533	-0.5454	0.0967	1.7e-08
rs145002878	19	36893133	ZNF345	T	C	0.0338	0.7528	0.1102	8.256e-12
rs150575544	19	37567764	ZNF571	C	G	0.9575	-0.6278	0.1028	1.009e-09
rs186156954	19	37595735	ZNF540	A	G	0.0328	0.7579	0.1112	9.397e-12
rs140943205	19	37638268	ZFP30	T	C	0.033	0.7515	0.1111	1.355e-11
rs150584091	19	38003682	SIPA1L3	A	G	0.0371	0.5169	0.0837	6.567e-10
rs141765490	19	38071355	SIPA1L3	T	C	0.0283	0.8493	0.1155	1.884e-13
rs118040651	19	38157493	SIPA1L3	C	G	0.9645	-0.5129	0.0874	4.434e-09
rs116981346	19	38206937	SIPA1L3	A	G	0.9649	-0.5193	0.087	2.36e-09
rs576820096	19	38625740	EIF3K	T	C	0.024	0.8061	0.128	3.058e-10
rs143802595	19	38991531	FBXO27	T	C	0.9795	-0.773	0.1225	2.757e-10
rs533645723	19	39036433	FBXO27	T	TA	0.0206	0.8515	0.1364	4.312e-10
rs143626739	19	39099540	ACP7	A	G	0.0217	0.8262	0.1339	6.829e-10
rs35106218	19	39155161	PAK4	T	C	0.0222	0.784	0.1331	3.829e-09
rs8102166	19	53583782	ZNF331	A	C	0.8263	-0.7126	0.1247	1.094e-08
rs56092144	19	56232671	ZSCAN5A	T	C	0.9499	-1.1466	0.1598	7.236e-13

## Sheet: Table S1c
Supplementary Table 1c. Significant (P<5e-8) GWAS results from meta-analysis of African ancestry indviduals (GRCh38).
rsID	CHR	BP	Mapped Gene	Effect Allele	Other Allele	EAF	Beta	SE	P
rs1299376	1	186384083	ORD4	T	C	0.9103	-1.0458	0.1892	3.259e-08
rs76733679	2	173306142	MAP3K20	T	G	0.0302	3.4199	0.6	1.2e-08
rs10930613	2	173676966		A	G	0.9644	-2.9035	0.5179	2.065e-08
rs7669591	4	97911328	STPG2	A	G	0.9671	-1.8536	0.3326	2.51e-08
rs200195313	6	17006793	STMND1	CAG	C	0.955	-2.2012	0.3939	2.293e-08
rs9352469	6	63054509		A	G	0.0325	3.8685	0.7035	3.813e-08
rs575869806	7	82901968	PCLO	A	T	0.9536	-1.6909	0.2848	2.908e-09
rs151022480	11	118190749	JAML	A	G	0.9668	-1.7079	0.3078	2.874e-08
rs78762921	12	63118812	AVPR1A	T	C	0.9596	-1.4021	0.2537	3.262e-08
rs28419307	15	46299504		A	T	0.0397	2.236	0.4095	4.735e-08
-	16	948197	LMF1	A	G	0.0831	1.7395	0.3157	3.573e-08
rs115553053	19	1082845	ARHGAP45	T	C	0.0362	1.6531	0.2858	7.275e-09
rs7247276	19	43196857	PSG4	A	C	0.8699	-1.8983	0.3402	2.402e-08
rs71350666	19	43355924	CD177	T	C	0.2101	1.2211	0.2167	1.743e-08
rs145044453	19	43385945	TEX101	T	TCCA	0.0745	1.8544	0.3054	1.268e-09
rs200733797	19	43393039	TEX101	CAG	C	0.9247	-1.9487	0.3078	2.446e-10
rs139560968	19	43404402	TEX101	CTATAT	C	0.9256	-1.9559	0.3085	2.31e-10
rs187223381	19	43404413	TEX101	T	C	0.9256	-1.9559	0.3085	2.31e-10
rs200786642	19	43406071	TEX101	CCT	C	0.9259	-1.9647	0.3088	1.99e-10
rs73885319	22	36265860	APOL1	A	G	0.7836	-0.9298	0.1196	7.378e-15
rs60910145	22	36265988	APOL1	T	G	0.7845	-0.9415	0.1201	4.467e-15
rs58384577	22	36267167	APOL1	T	C	0.7856	-0.9558	0.1225	6.08e-15
rs60295735	22	36271108	APOL1	A	G	0.2261	0.9383	0.124	3.759e-14
rs56277602	22	36272714	APOL1/MYH9	T	G	0.2643	0.7015	0.1174	2.296e-09
rs73885325	22	36274637	APOL1/MYH9	A	T	0.7279	-0.6796	0.1155	3.992e-09
rs151132501	22	36275208	APOL1/MYH9	A	AAAGG	0.6072	-0.9715	0.1772	4.205e-08
rs115103799	22	36279106	APOL1/MYH9	A	G	0.2214	1.1453	0.196	5.112e-09
rs73405714	22	36279367	APOL1/MYH9	A	G	0.7865	-0.9201	0.1228	6.861e-14
rs58168942	22	36286688	MYH9	A	G	0.1917	0.9808	0.1276	1.538e-14
rs11912763	22	36288676	MYH9	A	G	0.1914	0.9182	0.1262	3.394e-13
rs73405726	22	36292660	MYH9	C	G	0.2632	0.7686	0.1145	1.92e-11
rs56020676	22	36294074	MYH9	T	C	0.7365	-0.7666	0.1145	2.118e-11
rs73405727	22	36294441	MYH9	T	C	0.1919	0.9213	0.1266	3.353e-13
rs73885341	22	36295432	MYH9	A	G	0.2637	0.7642	0.1146	2.543e-11
rs16996648	22	36296706	MYH9	T	C	0.7361	-0.7644	0.1145	2.497e-11
rs56339459	22	36297566	MYH9	T	C	0.1914	0.9045	0.1267	9.473e-13
rs58088830	22	36298345	MYH9	A	C	0.2638	0.7683	0.1148	2.158e-11
rs55633261	22	36300669	MYH9	A	G	0.1911	0.9044	0.1272	1.148e-12
rs111957026	22	36307818	MYH9	A	G	0.2332	0.6592	0.1201	4.023e-08

## Sheet: Table S1d
Supplementary Table 1d. Significant (P<5e-8) GWAS results from meta-analysis of East Asian ancestry individuals (GRCh38).
rsID	CHR	BP	Mapped Gene	Effect Allele	Other Allele	EAF	Beta	SE	P
rs1391373	6	32635883	HLA-DRA	T	C	0.3973	0.2233	0.0404	3.359e-08
rs9269027	6	32469689	HLA-DRB5	A	T	0.1833	0.3189	0.0529	1.619e-09
rs28599891	6	32484693	HLA-DRB5	C	G	0.3937	0.2266	0.0415	4.609e-08
rs9269202	6	32481746	HLA-DQA1	T	C	0.1924	0.345	0.0555	5.124e-10
rs9272460	6	32637806	HLA-DQA1	A	G	0.3985	0.2207	0.0403	4.459e-08

## Sheet: Table S2a
Supplementary Table 2a. Independent Significant (P<5e-8) GWAS Results from GCTA-COJO Analysis of Multi-Ancestry Individuals (GRCh38).
rsID	CHR	BP	Mapped Gene	Effect Allele	EAF	Beta	SE	P
rs191872995	1	185737251	HMCN1	C	0.9887	-4.2476	0.7408	9.82044e-09
rs76733679	2	173306142	MAP3K20	T	0.0302	3.4199	0.6	1.19925e-08
rs1265889	6	32065839	TNXB	A	0.1285	0.4054	0.0436	1.4289e-20
rs9269032	6	32469977	HLA-DRB9	A	0.102	0.4927	0.0594	1.08939e-16
rs9273438	6	32659746	HLA-DQB1	A	0.4745	-0.2499	0.0354	1.67317e-12
rs575869806	7	82901968	PCLO	A	0.9536	-1.6909	0.2848	2.90021e-09
rs149556312	8	125666025	TRIB1	T	0.0261	3.5239	0.6064	6.20337e-09
rs139128886	11	48555288	OR4A47	T	0.9808	-1.6101	0.2664	1.50415e-09
rs139132726	17	57566488	MSI2	T	0.0102	5.1467	0.8412	9.45887e-10
rs186728968	19	34972186	ZNF792	A	0.0121	0.9488	0.1691	2.01299e-08
rs372598043	19	35945880	LRFN3	T	0.0181	1.1739	0.1287	7.42887e-20
rs150272170	19	35972253	LRFN3	A	0.9771	-1.0794	0.1193	1.45906e-19
rs576820096	19	38625740	EIF3K	T	0.024	0.8061	0.128	3.0218e-10
rs143802595	19	38991531	FBXO27	T	0.9795	-0.773	0.1225	2.78668e-10
rs56092144	19	56232671	ZSCAN5A	T	0.9466	-0.8187	0.1273	1.26547e-10
rs58168942	22	36286688	MYH9	A	0.1917	0.9808	0.1276	1.51191e-14

## Sheet: Table S2b
Supplementary Table 2b. Independent Significant (P<5e-8) GWAS Results from GCTA-COJO Analysis of European Ancestry Individuals (GRCh38).
rsID	CHR	BP	Mapped Gene	Effect Allele	EAF	Beta	SE	P
rs116501595	2	159990831	PLA2R1	T	0.0137	0.8102	0.1437	1.71902e-08
rs1270942	6	31951083	CFB	A	0.891	-0.4882	0.0548	5.16069e-19
rs6932167	6	32645249	HLA-DQA1	A	0.1111	0.4971	0.0579	9.04483e-18
rs138765886	11	48494767	OR4A47	A	0.0197	1.2277	0.2189	2.04091e-08
rs148082328	19	35417556	FFAR2	T	0.0183	0.67	0.1096	9.76904e-10
rs62109662	19	35833563	NPHS1	A	0.02	0.7252	0.1031	2.00771e-12
rs4806237	19	35948396	LRFN3	A	0.2648	0.2074	0.0356	5.68251e-09
rs150584091	19	38003682	SIPA1L3	A	0.0371	0.5169	0.0837	6.59013e-10
rs143802595	19	38991531	FBXO27	T	0.9795	-0.773	0.1225	2.78668e-10
rs8102166	19	53583782	ZNF331	A	0.8263	-0.7126	0.1247	1.10017e-08

## Sheet: Table S2c
Supplementary Table 2c. Independent Significant (P<5e-8) GWAS Results from GCTA-COJO Analysis of African Ancestry Individuals (GRCh38).
rsID	CHR	BP	Mapped Gene	Effect Allele	EAF	Beta	SE	P
rs1299376	1	186384083	ORD4	T	0.9103	-1.0458	0.1892	3.24856e-08
rs76733679	2	173306142	MAP3K20	T	0.0302	3.4199	0.6	1.19925e-08
rs10930613	2	173676966		A	0.9644	-2.9035	0.5179	2.06704e-08
rs7669591	4	97911328	STPG2	A	0.9671	-1.8536	0.3326	2.50302e-08
rs200195313	6	17006793	STMND1	CAG	0.955	-2.2012	0.3939	2.29408e-08
rs9352469	6	63054509		A	0.0325	3.8685	0.7035	3.82094e-08
rs575869806	7	82901968	PCLO	A	0.9536	-1.6909	0.2848	2.90021e-09
rs151022480	11	118190749	JAML	A	0.9668	-1.7079	0.3078	2.87747e-08
rs78762921	12	63118812	AVPR1A	T	0.9596	-1.4021	0.2537	3.26485e-08
rs28419307	15	46299504		A	0.0397	2.236	0.4095	4.75284e-08
rs115553053	19	1082845	ARHGAP45	T	0.0362	1.6531	0.2858	7.28952e-09
rs200786642	19	43406071	TEX101	CCT	0.9259	-1.9647	0.3088	1.98664e-10
rs60910145	22	36265988	APOL1	T	0.7845	-0.9415	0.1201	4.53063e-15

## Sheet: Table S2d
Supplementary Table 2d. Independent Significant (P<5e-8) GWAS Results from GCTA-COJO Analysis of East Asian Ancestry Individuals (GRCh38).
rsID	CHR	BP	Mapped Gene	Effect Allele	EAF	Beta	SE	P
rs9269202	6	32481746	HLA-DRB5	T	0.1924	0.345	0.0555	5.09286e-10

## Sheet: Table S3
Supplementary Table 3. Replication of previously-reported NS genetic loci (GRCh38).
Previous studies as reported in the GWAS catalog										Multi-Ancestry						Non-Hispanic European Ancestry						Non-Hispanic African Ancestry						East Asian Ancestry
PUBMEDID	DISEASE/TRAIT	REPORTED/MAPPED GENE(S)	STRONGEST SNP-RISK ALLELE	CHR	POS	P-VALUE	OR	Beta	95% CI (TEXT)	A1	A2	Freq1	Beta	StdErr	P	A1	A2	Freq1	Beta	StdErr	P	A1	A2	Freq1	Beta	StdErr	P	A1	A2	Freq1	Beta	StdErr	P
21441931	Nephrotic syndrome (acquired)	GPC5	rs16946160-A	13	91551559	3e-07	1.39		[1.22-1.57]	A	G	0.0996	0.0689	0.0556	0.2157	A	G	0.0689	0.1045	0.0635	0.09952	A	G	0.214	-0.0075	0.1213	0.9508	A	G	0.1698	0.0571	0.0514	0.2666
21441931	Nephrotic syndrome (acquired)	LINC03079 - LINC00494	rs11086243-T	20	48150492	3e-06	1.37		[1.20-1.57]	T	C	0.4829	0.0185	0.0303	0.5412	T	C	0.499	-0.0234	0.032	0.4649	T	C	0.3285	0.148	0.1064	0.164	T	C	0.2262	-0.0872	0.0464	0.06039
29903748	Childhood steroid-sensitive nephrotic syndrome	HLA-DQB1-AS1, HLA-DQB1	rs1063348-?	6	32660146	1e-08	2.96		[2.04-4.29]	A	G	0.4255	0.1041	0.0418	0.01279	A	G	0.4095	-0.1255	0.0458	0.006187	A	G	0.5047	0.0573	0.1173	0.6255	A	G	0.4557	-0.0068	0.0388	0.8606
29903748	Childhood steroid-sensitive nephrotic syndrome	HLA-DRB1 - HLA-DQA1	rs28366266-?	6	32591976	6e-06	2.25		[1.59-3.2]	T	C	0.8656	0.0521	0.0464	0.261	T	C	0.8664	0.0474	0.0493	0.3368	T	C	0.8686	0.1783	0.1573	0.2572	T	C	0.8496	0.0149	0.0543	0.7835
29903748	Childhood steroid-sensitive nephrotic syndrome	HLA-DQB1-AS1, HLA-DQB1	rs1063348-?	6	32660146	3e-07	3.24		[1.93-5.45]	A	G	0.4255	0.1041	0.0418	0.01279	A	G	0.4095	-0.1255	0.0458	0.006187	A	G	0.5047	0.0573	0.1173	0.6255	A	G	0.4557	-0.0068	0.0388	0.8606
29903748	Childhood steroid-sensitive nephrotic syndrome	TSBP1-AS1, BTNL2	rs2076523-?	6	32403058	2e-09	4.8		[2.9-7.9]	T	C	0.6386	0.0652	0.0318	0.0405	T	C	0.6355	0.0654	0.0338	0.05275	T	C	0.6793	0.1395	0.1076	0.1946	T	C	0.5097	0.0149	0.0385	0.6985
37547536	Pediatric steroid sensitive nephrotic syndrome	HLA-DRB1 - HLA-DQA1	rs9271602-G	6	32623606	1e-27	2.75		[2.29-3.3]	T	G	0.6519	0.0477	0.0378	0.2064	T	G	0.6479	-0.0508	0.039	0.193							T	G	0.5598	0.0476	0.0394	0.2267
37547536	Pediatric steroid sensitive nephrotic syndrome	HLA-DQB1 - MTCO3P1	rs2856665-G	6	32697820	2e-68	4.06		[3.47-4.75]	A	G	0.9098	0.0337	0.0556	0.5449	A	G	0.9115	-0.0024	0.0601	0.968	A	G	0.9002	0.2799	0.1631	0.08605
38560502	Steroid-sensitive nephrotic syndrome without relapse	ALPG	rs117962550-A	2	232407021	7e-10	4.134		[2.632-6.492]
38560502	Steroid-sensitive nephrotic syndrome without relapse	ANKRD36	rs1464545187-A	2	97909692	3e-08	2.617		[1.86-3.682]
38560502	Steroid-sensitive nephrotic syndrome without relapse	SLC9C2	rs746236012-A	1	173600254	1e-07	4.395		[2.548-7.58]
38560502	Steroid-dependent/frequent relapse nephrotic syndrome	HLA-DQA1	rs1047989-A	6	32637480	2e-12	0.389		[0.299-0.506]	A	C	0.5474	0.093	0.0415	0.02482	A	C	0.5728	0.1388	0.0456	0.002364	A	C	0.4134	-0.1765	0.113	0.1184	A	C	0.5031	-0.0153	0.0387	0.6929
38560502	Steroid-dependent/frequent relapse nephrotic syndrome		chr2:171713702-T			1e-08	5.704		[3.127-10.4]
38560502	Steroid-dependent/frequent relapse nephrotic syndrome	MUC16	rs774409792-A	19	8886823	1e-07	4.147		[2.444-7.035]
38560502	Steroid-dependent/frequent relapse nephrotic syndrome	APOL4	rs117014418-A	22	36191356	2e-07	3.122		[2.04-4.777]
38560502	Steroid-dependent/frequent relapse nephrotic syndrome	HLA-DQB1	rs1063322-G	6	32662158	3e-07	0.496		[0.379-0.65]
38560502	Steroid-dependent/frequent relapse nephrotic syndrome	HLA-DQB1-AS1, HLA-DQB1	rs1770-G	6	32660056	2e-07	1.924		[1.503-2.463]	A	G	0.5169	0.0268	0.0379	0.4799	A	G	0.5382	0.0596	0.0488	0.2219	A	G	0.4845	-0.0231	0.0601	0.7011
38560502	Steroid-dependent/frequent relapse nephrotic syndrome	HLA-DQA1	rs28383345-A	6	32637457	3e-07	3.246		[2.071-5.087]	A	G	0.1423	0.0235	0.0693	0.7346	A	G	0.1442	-0.0467	0.0739	0.5274	A	G	0.0989	0.0961	0.2847	0.7358
38560502	Steroid-dependent/frequent relapse nephrotic syndrome	HLA-DQA1	rs28383346-G	6	32637549	3e-07	3.225		[2.058-5.054]	A	G	0.8575	0.0247	0.0693	0.7217	A	G	0.8556	0.048	0.0739	0.5159	A	G	0.9011	-0.096	0.2849	0.7361
38560502	Steroid-dependent/frequent relapse nephrotic syndrome	TNXA	rs6457477-T	6	32009614	4e-07	2.148		[1.598-2.888]
38560502	Steroid-dependent/frequent relapse nephrotic syndrome	HLA-DQB1-AS1, HLA-DQB1	rs9273471-A	6	32660253	4e-07	1.899		[1.481-2.434]	A	G	0.2968	0.0218	0.0688	0.7516	A	G	0.3072	0.0166	0.0817	0.8386	A	G	0.2713	0.0344	0.1278	0.7878
38560502	Steroid-dependent/frequent relapse nephrotic syndrome	FRG1JP	rs139880713-C	9	63837834	2e-07	4.794		[2.646-8.685]
29903748	Childhood steroid-sensitive nephrotic syndrome	HLA-DQB1-AS1, HLA-DQB1	rs1063348-G	6	32660146	9e-23	3.33		[2.62-4.23]	A	G	0.4255	0.1041	0.0418	0.01279	A	G	0.4095	-0.1255	0.0458	0.006187	A	G	0.5047	0.0573	0.1173	0.6255	A	G	0.4557	-0.0068	0.0388	0.8606
29903748	Childhood steroid-sensitive nephrotic syndrome	BTC	rs59882675-?	4	74763902	6e-08				A	G	0.8156	0.0326	0.0423	0.4405	A	G	0.8631	-0.0515	0.047	0.2732	A	G	0.5864	0.0793	0.106	0.4548	A	G	0.9287	-0.0661	0.093	0.4775
29903748	Childhood steroid-sensitive nephrotic syndrome	DSE - CBX3P9	rs2858829-?	6	116447754	7e-08				A	G	0.6016	0.0597	0.0315	0.05822	A	G	0.5863	0.0659	0.0326	0.0429	A	G	0.8587	0.0218	0.1479	0.8826	A	G	0.5914	-0.0505	0.0394	0.2002
29903748	Childhood steroid-sensitive nephrotic syndrome	HLA-DRB1 - HLA-DQA1	rs28366266-C	6	32591976	4e-20	3.03		[2.40-3.85]	T	C	0.8656	0.0521	0.0464	0.261	T	C	0.8664	0.0474	0.0493	0.3368	T	C	0.8686	0.1783	0.1573	0.2572	T	C	0.8496	0.0149	0.0543	0.7835
29903748	Childhood steroid-sensitive nephrotic syndrome	TSBP1-AS1	rs9348883-T	6	32390772	9e-07	3.5		[2.13-5.83]	A	T	0.0592	0.0224	0.0657	0.733	A	T	0.0536	-0.0557	0.0715	0.4366	A	T	0.0609	0.099	0.2057	0.6302	A	T	0.0947	-0.1602	0.0655	0.01449
29903748	Childhood steroid-sensitive nephrotic syndrome	HLA-DRB1 - HLA-DQA1	rs28383254-?	6	32617861	3e-08	5.7		[3.1-10.6]	A	C	0.8792	0.051	0.0494	0.3013	A	C	0.8785	0.0393	0.0526	0.4555	A	C	0.8992	0.2502	0.1653	0.1302
31263063	Childhood steroid-sensitive nephrotic syndrome		HLA-DQB1*03:03			1e-08																						A	C	0.7833	-0.0659	0.0483	0.1722
31263063	Childhood steroid-sensitive nephrotic syndrome		HLA-DQB1*03			2e-08
31263063	Childhood steroid-sensitive nephrotic syndrome	HLA-DQB1 - MTCO3P1	rs2858317-?	6	32694503	4e-31				A	C	0.5846	0.0559	0.0519	0.2811	A	C	0.5796	-0.0889	0.0555	0.1091	A	C	0.5991	0.1851	0.1984	0.351	T	C	0.5957	-0.0647	0.0396	0.1025
31263063	Childhood steroid-sensitive nephrotic syndrome		HLA-DQA1*02:01			1e-32	3.42		[2.80-4.16]																			A	G	0.0488	0.0759	0.0896	0.3973
31263063	Childhood steroid-sensitive nephrotic syndrome		HLA-DQA1*01			2e-31
31263063	Childhood steroid-sensitive nephrotic syndrome	HLA-DQB1	rs9273542-T	6	32661035	2e-43	3.39		[2.86-4.03]	T	C	0.2763	0.191	0.0564	0.0007149	T	C	0.2849	0.2162	0.0605	0.0003494	T	C	0.2156	-0.0389	0.2045	0.8493	T	C	0.1067	0.0047	0.0668	0.9435
31263063	Childhood steroid-sensitive nephrotic syndrome	CALHM6 - TRAPPC3L	rs2637678-?	6	116466215	1e-17	1.96078		[1.67-2.27]	T	C	0.5962	0.0587	0.0309	0.05763	T	C	0.5817	0.0698	0.0325	0.03162	T	C	0.7415	0.0075	0.1144	0.9477	T	C	0.9168	0.0283	0.0755	0.7083
31263063	Childhood steroid-sensitive nephrotic syndrome	PARM1	rs10518133-A	4	75025495	3e-08	1.96		[1.57-2.45]	A	G	0.0798	0.0321	0.0604	0.5945	A	G	0.0607	0.0338	0.0678	0.6184	A	G	0.1642	0.0343	0.1403	0.8068	T	C	0.1931	-0.0387	0.0495	0.434
31263063	Childhood steroid-sensitive nephrotic syndrome	PTPRC	rs113752715-?	1	198738388	2e-06	2.12766		[1.52-3.03]	T	G	0.9297	0.1923	0.0623	0.00201	T	G	0.9281	0.1985	0.0651	0.002292	T	G	0.9626	-0.0418	0.2645	0.8745	C	G	0.3865	0.0004	0.0399	0.9914
31263063	Childhood steroid-sensitive nephrotic syndrome	KALRN	rs530462-?	3	124510192	3e-06	1.5873		[1.3-1.92]	T	C	0.2319	0.0012	0.0382	0.9757	T	C	0.1859	0.0022	0.042	0.9576	T	C	0.4816	-0.0067	0.1004	0.9467
31263063	Childhood steroid-sensitive nephrotic syndrome	TSC22D2	rs6763024-C	3	150452068	9e-06	1.41		[1.21-1.63]	T	C	0.7401	0.0069	0.0345	0.8423	T	C	0.7416	0.0051	0.0367	0.8898	T	C	0.7185	-0.0545	0.1123	0.6273
31263063	Childhood steroid-sensitive nephrotic syndrome	BCL6 - LINC01991	rs487575-?	3	187880609	1e-06	1.5873		[1.3-1.92]	T	C	0.2679	0.0011	0.0346	0.9752	T	C	0.274	0.013	0.0363	0.7209	T	C	0.202	-0.0824	0.1279	0.5194
31263063	Childhood steroid-sensitive nephrotic syndrome	NWD2	rs6531527-G	4	37351175	7e-06	1.38		[1.20-1.58]	C	G	0.5807	0.0628	0.031	0.04252	C	G	0.5691	-0.0577	0.0326	0.07643	C	G	0.7227	-0.1142	0.1152	0.3216
31263063	Childhood steroid-sensitive nephrotic syndrome	LINC02531 - U3	rs2674382-?	6	92777658	9e-06	2.17391		[1.47-3.12]	A	T	0.9331	0.0821	0.062	0.1855	A	T	0.9314	-0.0944	0.0634	0.1368	A	T	0.9689	0.1773	0.2909	0.5422
31263063	Childhood steroid-sensitive nephrotic syndrome	AHI1	rs2746419-A	6	135332717	1e-06	1.42		[1.23-1.63]	A	C	0.4661	0.0102	0.0308	0.7405	A	C	0.4445	-0.0241	0.0323	0.4555	A	C	0.7547	0.1737	0.1197	0.1467	A	C	0.3123	0.0777	0.0418	0.06323
31263063	Childhood steroid-sensitive nephrotic syndrome	ELMO1	rs111796602-C	7	37362887	3e-06	1.63		[1.34-1.99]	T	C	0.8939	0.0804	0.0497	0.1058	T	C	0.8907	-0.077	0.0514	0.1342	T	C	0.9542	-0.1081	0.2361	0.6472
31263063	Childhood steroid-sensitive nephrotic syndrome	HNRNPA1P32 - RN7SL63P	rs201899638-?	10	30541663	5e-07	9.09091		[2.5-33.33]	T	C	0.9768	0.1684	0.0882	0.05617	T	C	0.9759	0.175	0.0926	0.05865	T	C	0.9855	-0.0289	0.3095	0.9256
31263063	Childhood steroid-sensitive nephrotic syndrome	ZNF438 - LINC02664	rs1891621-G	10	31101198	4e-06	1.39		[1.21-1.60]	A	G	0.543	0.008	0.0304	0.7934	A	G	0.5387	0.0073	0.0322	0.822	A	G	0.5952	0.0613	0.1019	0.5471	A	G	0.4914	0.0266	0.039	0.4943
31263063	Childhood steroid-sensitive nephrotic syndrome	ZNF345	rs34217742-A	19	36885928	8e-06	1.56		[1.29-1.88]	A	T	0.1293	0.0535	0.046	0.2448	A	T	0.1317	0.0545	0.0466	0.2424
30012571	Childhood steroid-sensitive nephrotic syndrome	HLA-DQB1 - MTCO3P1	rs4642516-T	6	32689766	7e-13	3.0303		[2.44-3.85]	T	G	0.4652	0.0023	0.0315	0.9422	T	G	0.462	0.0098	0.0334	0.7698	T	G	0.4716	-0.124	0.1071	0.2469	T	G	0.7389	-0.003	0.0441	0.9463
34594039	Nephrotic syndrome	TNXB	rs1265889-A	6	32065839	2e-16		0.52 unit increase	[0.4-0.65]	A	G	0.142	0.4013	0.0463	466000000	A	G	0.1456	0.4105	0.0473	4.15e-18	A	G	0.0591	0.1883	0.2274	0.4077
34594039	Nephrotic syndrome	MIR3672 - TPT1P13	rs751611955-A	X	121613268	2e-08		19.59 unit increase	[12.74-26.45]
34594039	Nephrotic syndrome	HLA-DRB9 - HLA-DRB5	rs9269202-C	6	32481746	5e-10		0.36 unit increase	[0.24-0.47]	T	C	0.2992	0.0328	0.0438	0.454	T	C	0.2798	-0.037	0.049	0.4502	T	C	0.3672	0.3441	0.1093	0.001646	T	C	0.1924	0.345	0.0555	5.12e-10
32554042	Childhood steroid-sensitive nephrotic syndrome	NPHS1	rs2285450-A	19	35851365	7e-28	1.88		[1.68-2.11]	A	G	0.1144	0.2692	0.1595	0.09149							A	G	0.1144	-0.2692	0.1595	0.09149
32554042	Childhood steroid-sensitive nephrotic syndrome	TNFSF15	rs4979462-T	9	114804733	5e-11	1.33		[1.22-1.44]	T	C	0.1848	0.0668	0.0685	0.3295							T	C	0.3237	-0.0312	0.1059	0.7683	T	C	0.4682	0.0317	0.0392	0.4194
37120605	Pediatric steroid sensitive nephrotic syndrome	CLIC4 - RUNX3	rs4649032-T	1	24871095	1e-06	1.2		[1.12-1.3]	T	C	0.4775	0.0552	0.0305	0.06974	T	C	0.4874	0.0409	0.0321	0.2037	T	C	0.3912	0.2021	0.1068	0.05851	T	C	0.4519	0.0839	0.0393	0.03281
37120605	Pediatric steroid sensitive nephrotic syndrome	ADGRF4 - OPN5	rs62397901-G	6	47778410	2e-06	1.5		[1.27-1.78]	T	G	0.9465	0.0026	0.0716	0.9706	T	G	0.9483	-0.0204	0.0751	0.7857
37120605	Pediatric steroid sensitive nephrotic syndrome	KC6	rs16975006-T	18	41580919	6e-08	1.68		[1.39-2.02]	T	G	0.1769	0.093	0.0948	0.3267	T	G	0.0153	-0.1073	0.168	0.5232	T	G	0.2524	-0.0864	0.1149	0.4522
37120605	Pediatric steroid sensitive nephrotic syndrome	LINC02188 - LINC02181	rs7197567-T	16	86946438	4e-07	1.31		[1.18-1.45]	T	C	0.1944	0.1107	0.0621	0.07488	T	C	0.0465	0.15	0.0781	0.05488	T	C	0.4729	0.0459	0.1056	0.6637	T	C	0.1849	0.0527	0.0537	0.3263
37120605	Pediatric steroid sensitive nephrotic syndrome	RPL12P5 - COCH	rs12431424-A	14	30848973	4e-06	0.78		[0.7-0.87]	A	T	0.1356	0.0347	0.0463	0.4531	A	T	0.128	-0.0015	0.0498	0.9755	A	T	0.1929	-0.247	0.1375	0.0724	A	T	0.178	-0.002	0.0519	0.97
37120605	Pediatric steroid sensitive nephrotic syndrome	RRP12	rs6584128-G	10	97412169	2e-07	1.21		[1.13-1.3]	T	G	0.6286	0.0109	0.0316	0.7311	T	G	0.652	0.0094	0.0337	0.7794	T	G	0.4186	0.0066	0.1016	0.9481	T	G	0.6823	-0.0179	0.0416	0.6674
37120605	Pediatric steroid sensitive nephrotic syndrome	CCDC66	rs190705792-T	3	56578571	3e-07	2.47		[1.74-3.49]	T	G	0.0179	0.0309	0.1239	0.8029	T	G	0.0156	-0.0666	0.1357	0.6234	T	G	0.0295	0.5183	0.3033	0.08751
37120605	Pediatric steroid sensitive nephrotic syndrome	CCDC162P	rs76615866-C	6	109297161	7e-07	2.08		[1.56-2.78]	C	G	0.2006	0.1255	0.1186	0.29							C	G	0.2083	-0.1062	0.121	0.38
37120605	Pediatric steroid sensitive nephrotic syndrome	HLA-DQA1 - HLA-DQB1	rs9273344-?	6	32655681	3e-06	0.18		[0.09-0.37]	T	C	0.6107	0.0752	0.0317	0.01772	T	C	0.5747	-0.1077	0.0354	0.002351
37120605	Pediatric steroid sensitive nephrotic syndrome	HLA-DQB1 - MTCO3P1	rs2856696-T	6	32684091	2e-68	2.8			A	T	0.9094	0.0348	0.0556	0.5316	A	T	0.9111	-0.0015	0.06	0.9802	A	T	0.8993	0.2834	0.1629	0.08187
37120605	Pediatric steroid sensitive nephrotic syndrome		HLA_DQA1*02-T			3e-59	2.49
37120605	Pediatric steroid sensitive nephrotic syndrome	HLA-DQB1, HLA-DQB1-AS1	rs9273479-T	6	32660316	1e-33	0.49			T	C	0.398	0.1922	0.0502	0.0001302	T	C	0.3918	-0.1893	0.0541	0.000471	T	C	0.4948	-0.2031	0.1743	0.2438	T	C	0.2835	0.0052	0.0433	0.9045
37120605	Pediatric steroid sensitive nephrotic syndrome		HLA_DQA1*01-T			4e-29	0.53
37120605	Pediatric steroid sensitive nephrotic syndrome	HLA-DQB1, HLA-DQB1-AS1	rs1063355-T	6	32659937	5e-81	0.46		[0.42-0.5]	T	G	0.4375	0.1666	0.0318	1.69e-07	T	G	0.4324	-0.1888	0.0337	2.03e-08	T	G	0.4766	0.0749	0.1125	0.5057	T	G	0.4534	-0.0075	0.0387	0.8455
37120605	Pediatric steroid sensitive nephrotic syndrome	NPHS1	rs412175-C	19	35851201	4e-22	1.65		[1.49-1.83]	T	C	0.819	0.0052	0.0647	0.9361	T	C	0.9606	0.0049	0.0823	0.9521	T	C	0.5907	0.0056	0.1046	0.9574
37120605	Pediatric steroid sensitive nephrotic syndrome	CALHM6 - TRAPPC3L	rs2637678-C	6	116466215	1e-10	0.79		[0.73-0.85]	T	C	0.5962	0.0587	0.0309	0.05763	T	C	0.5817	0.0698	0.0325	0.03162	T	C	0.7415	0.0075	0.1144	0.9477	T	C	0.5957	-0.0647	0.0396	0.1025
37120605	Pediatric steroid sensitive nephrotic syndrome	AHI1	rs7759971-T	6	135425746	1e-13	1.34		[1.24-1.44]	T	C	0.3427	0.021	0.0322	0.5131	T	C	0.3517	0.0124	0.0335	0.7107	T	C	0.1663	0.0393	0.1373	0.7746	T	C	0.2062	0.0881	0.048	0.06671
37120605	Pediatric steroid sensitive nephrotic syndrome	TNFSF15 - DELEC1	rs10817678-G	9	114817177	3e-10	0.79		[0.73-0.85]	A	G	0.6841	0.0108	0.0331	0.743	A	G	0.6737	0.0073	0.0342	0.8299	A	G	0.8786	0.0227	0.1589	0.8865	A	G	0.6266	0.0246	0.0401	0.5388
37120605	Pediatric steroid sensitive nephrotic syndrome	CLEC16A	rs8062322-A	16	10998462	3e-11	0.75		[0.68-0.81]	A	C	0.3209	0.0144	0.0326	0.658	A	C	0.2999	-0.0296	0.0349	0.3964	A	C	0.482	0.1059	0.0993	0.2861	A	C	0.1921	-0.0936	0.0492	0.05736
37120605	Pediatric steroid sensitive nephrotic syndrome	CD28	rs55730955-A	2	203721233	4e-11	0.74		[0.68-0.81]	A	T	0.0638	0.0835	0.0633	0.1868	A	T	0.0586	0.0282	0.0691	0.6834	A	T	0.0943	0.3603	0.1721	0.0363	A	T	0.507	-0.0586	0.0391	0.1343
37120605	Pediatric steroid sensitive nephrotic syndrome	BTC	rs28862935-A	4	74768255	1e-10	1.41		[1.27-1.56]	A	G	0.185	0.0375	0.0419	0.3707	A	G	0.1368	0.0565	0.0466	0.2254	A	G	0.4148	-0.0722	0.1048	0.4906	A	G	0.0717	0.0498	0.0919	0.588
37120605	Pediatric steroid sensitive nephrotic syndrome	HLA-DQB1 - MTCO3P1	rs1794497-C	6	32681403	7e-52	2.04		[1.89-2.27]	T	C	0.8967	0.0327	0.0537	0.5426	T	C	0.9058	0.0023	0.0586	0.9685	T	C	0.8954	0.2916	0.1615	0.07108	T	C	0.8175	0.0098	0.0497	0.8435
37120605	Pediatric steroid sensitive nephrotic syndrome	MICA	rs2256318-A	6	31413742	1e-17	1.49		[1.36-1.64]	A	G	0.1545	0.0653	0.0444	0.1415	A	G	0.1313	-0.0633	0.0494	0.2001	A	G	0.2453	-0.024	0.1146	0.8342	A	G	0.2751	-0.0544	0.0441	0.2175
37120605	Pediatric steroid sensitive nephrotic syndrome	GSDMB	rs9303279-G	17	39917715	2e-07	1.22		[1.13-1.31]	C	G	0.5328	0.0405	0.031	0.1916	C	G	0.5153	-0.0471	0.0321	0.143	C	G	0.843	0.016	0.1435	0.9111	C	G	0.7292	-0.0815	0.0434	0.06078
37120605	Pediatric steroid sensitive nephrotic syndrome	TNFSF4 - PRDX6-AS1	rs1012507-T	1	173250332	6e-06	1.2		[1.11-1.29]	T	G	0.3488	0.1	0.0318	0.001649	T	G	0.3561	0.0868	0.0335	0.009619	T	G	0.2664	0.3295	0.1129	0.003521	T	G	0.1988	0.0889	0.0488	0.06823
37120605	Pediatric steroid sensitive nephrotic syndrome	PHC1	rs1805732-T	12	8938296	2e-07	0.82		[0.76-0.88]
37120605	Pediatric steroid sensitive nephrotic syndrome	MORF4L1	rs12911841-T	15	78870013	7e-07	1.82		[1.43-2.3]													T	C	0.2257	0.07	0.197	0.7223
37120605	Pediatric steroid sensitive nephrotic syndrome	RNF39 - TRIM31	rs1264705-?	6	30095897	3e-07	4.64		[2.58-8.34]	C	G	0.1024	0.2337	0.0549	2.09e-05	C	G	0.1029	0.2414	0.0579	3.05e-05	C	G	0.0984	0.1645	0.1736	0.3433
37120605	Pediatric steroid sensitive nephrotic syndrome	HLA-DQB1 - MTCO3P1	rs9274740-A	6	32670191	1e-39	0.41		[0.36-0.47]	A	T	0.5531	0.0388	0.0359	0.2802	A	T	0.5551	-0.024	0.0372	0.5193	A	T	0.5744	-0.3263	0.1808	0.07113	A	T	0.2846	0.0081	0.0432	0.8507
37120605	Pediatric steroid sensitive nephrotic syndrome	NPHS1	rs412175-T	19	35851201	7e-25	0.53		[0.47-0.6]	T	C	0.819	0.0052	0.0647	0.9361	T	C	0.9606	0.0049	0.0823	0.9521	T	C	0.5907	0.0056	0.1046	0.9574
37120605	Pediatric steroid sensitive nephrotic syndrome	HLA-S - MICA	rs2596485-T	6	31397093	2e-15	0.61		[0.53-0.69]	T	C	0.8151	0.0725	0.049	0.1387	T	C	0.8258	-0.0644	0.0511	0.2081	T	C	0.8912	-0.4106	0.2881	0.1541	T	C	0.6508	-0.0602	0.0417	0.1484
37120605	Pediatric steroid sensitive nephrotic syndrome	TNFSF15 - DELEC1	rs7848647-T	9	114806766	1e-12	0.7		[0.63-0.77]	T	C	0.3075	0.0002	0.0332	0.9949	T	C	0.3179	0.0034	0.0344	0.9216	T	C	0.1167	-0.0104	0.1569	0.9472	T	C	0.3738	-0.023	0.0398	0.563
37120605	Pediatric steroid sensitive nephrotic syndrome	CD28	rs1181388-A	2	203711228	5e-11	0.73		[0.66-0.8]	A	G	0.1596	0.0303	0.0423	0.4744	A	G	0.1421	0.0119	0.0459	0.7947	A	G	0.276	0.1376	0.1152	0.2323	A	G	0.505	-0.0585	0.039	0.1338
37120605	Pediatric steroid sensitive nephrotic syndrome	ZNF311 - OR2AD1P	rs115180879-T	6	29016846	3e-09	3		[2.09-4.32]	T	C	0.0522	0.1036	0.0906	0.2526	T	C	0.037	-0.0865	0.1084	0.425	T	C	0.0922	-0.1453	0.1752	0.407
37120605	Pediatric steroid sensitive nephrotic syndrome	CLEC16A	rs8062322-A	16	10998462	5e-09	0.68		[0.59-0.77]	A	C	0.3209	0.0144	0.0326	0.658	A	C	0.2999	-0.0296	0.0349	0.3964	A	C	0.482	0.1059	0.0993	0.2861	A	C	0.1921	-0.0936	0.0492	0.05736
37120605	Pediatric steroid sensitive nephrotic syndrome	HLA-DRB1 - HLA-DQA1	rs9271747-T	6	32626037	6e-51	3.3		[2.82-3.86]
37120605	Pediatric steroid sensitive nephrotic syndrome	CALHM6 - TRAPPC3L	rs2637678-T	6	116466215	2e-27	1.74		[1.58-1.93]	T	C	0.5962	0.0587	0.0309	0.05763	T	C	0.5817	0.0698	0.0325	0.03162	T	C	0.7415	0.0075	0.1144	0.9477	T	C	0.5957	-0.0647	0.0396	0.1025
37120605	Pediatric steroid sensitive nephrotic syndrome	NFKBIL1	rs2857607-T	6	31549471	1e-13	1.95		[1.66-2.31]	T	C	0.0702	0.0349	0.0627	0.5779	T	C	0.0671	-0.0449	0.0671	0.5028	T	C	0.0913	0.0343	0.1758	0.8452
37120605	Pediatric steroid sensitive nephrotic syndrome	AHI1	rs2746419-A	6	135332717	2e-10	1.34		[1.22-1.47]	A	C	0.4661	0.0102	0.0308	0.7405	A	C	0.4445	-0.0241	0.0323	0.4555	A	C	0.7547	0.1737	0.1197	0.1467	A	C	0.3123	0.0777	0.0418	0.06323
37120605	Pediatric steroid sensitive nephrotic syndrome	ELMO1	rs111796602-T	7	37362887	2e-08	0.68		[0.59-0.78]	T	C	0.8939	0.0804	0.0497	0.1058	T	C	0.8907	-0.077	0.0514	0.1342	T	C	0.9542	-0.1081	0.2361	0.6472
37120605	Pediatric steroid sensitive nephrotic syndrome	MORF4L1	rs12911841-T	15	78870013	4e-08	2.95		[2.01-4.34]													T	C	0.2257	0.07	0.197	0.7223
37120605	Pediatric steroid sensitive nephrotic syndrome	HLA-DQB1 - MTCO3P1	rs28755181-?	6	32674236	3e-51	3.35		[2.86-3.92]	A	C	0.0859	0.0024	0.0917	0.9791	A	C	0.0851	-0.0036	0.0992	0.9714	A	C	0.0859	0.0991	0.3254	0.7607

## Sheet: Table S4
Supplementary Table 4. Genetic Correlation Across Related Phenotypes of Nephrotic Syndrome.
Phenotype	Rg (se)	P	Data Source (PMID)
Pediatric Nephrotic Syndrome	0.63 (0.095)	3.52x10-11	37120605
Diabetic Kidney Disease	0.24 (0.13)	0.069	34594039
Systolic Blood Pressure	0.061 (0.037)	0.1	30224653
Blood Urea Nitrogen	-0.041 (0.035)	0.24	34594039
eGFR	0.037 (0.035)	0.29	35710981
Acute Kidney Injury (AKI)	-0.073 (0.100)	0.47	34594039
Membranous Nephropathy	0.205 (0.300)		32231244
Type 2 Diabetes	0.0088 (0.036)	0.81	34594039
Chronic Glomerulonephritis	-0.28 (2.35)	0.9	34594039

[truncated: 6 more sheets: Table S5a, Table S5b, Table S5c, Table S5d, Table S6a, Table S6b]
